# Supplementary material for: Grapevine – Downy Mildew <em>Rendez-Vous</em>: Proteome Analysis of the First Hours of an Incompatible Interaction
Source: Preprints.org preprint supplement (doi:10.20944/preprints202010.0066.v1), 2020-10-05
Supplement: Supplementary file 1 [file supplementary]

## Sheet: Table S1
Table S1. List of V. vinifera differentially accumulated proteins at 6 and 12 hpi.
Protein Name	Protein acc. nº (NCBI)	Gene ID	Fold change 6 hpi (log2; P. viticola vs mock inoculated leaf)	6 hpi p-value	Fold change 12 hpi (log2; P. viticola vs mock inoculated leaf)	12 hpi p-value
PREDICTED: triosephosphate isomerase, cytosolic [Vitis vinifera]	XP_002283693.1	100263345	-1.35	0.127426	5.23	6.55739e-05
PREDICTED: malate dehydrogenase [NADP], chloroplastic [Vitis vinifera]	XP_002265080.1	100247974	-2.7	0.000956303	3.13	0.000317615
PREDICTED: probable protein disulfide-isomerase A6 [Vitis vinifera]	XP_002282603.1	100258052	-0.69	0.113607	2.72	3.88489e-05
hypothetical protein VITISV_028922 [Vitis vinifera]	CAN78612.1	104879610	2.22	0.000620219	-0.595	0.223258
PREDICTED: uncharacterized protein LOC100245386 [Vitis vinifera]	XP_002264554.1	100245386	2.39	0.000260037	-0.439	0.342412
PREDICTED: fruit protein pKIWI502 [Vitis vinifera]	XP_002283966.1	100255949	2.02	0.0392768	3.99	0.000816136
PREDICTED: luminal-binding protein 5 [Vitis vinifera]	XP_002263323.1	100251379	0.0521	0.939295	4.09	9.75411e-05
PREDICTED: plastoglobulin-1, chloroplastic [Vitis vinifera]	XP_002276479.1	100264252	-2.98	0.000569548	0.11	0.860421
PREDICTED: signal recognition particle 43 kDa protein, chloroplastic [Vitis vinifera]	XP_002282206.1	100243569	3.67	0.000199482	0.0414	0.950708
PREDICTED: probable pyridoxal 5'-phosphate synthase subunit PDX1 [Vitis vinifera]	XP_002278391.1	100260451	-0.399	0.670033	4.17	0.000925677
PREDICTED: 60S ribosomal protein L4 [Vitis vinifera]	XP_002285741.1	100251826	0.837	0.0872108	-2.75	8.71252e-05
PREDICTED: chlorophyll a-b binding protein CP29.1, chloroplastic [Vitis vinifera]	XP_002279834.1	100266604	-4.49	1.301e-05	-0.911	0.146745
PREDICTED: aminomethyltransferase, mitochondrial [Vitis vinifera]	XP_002272701.1	100250401	-1.74	0.0348854	5.42	1.57698e-05
PREDICTED: ATP synthase gamma chain, chloroplastic [Vitis vinifera]	XP_002275015.1	100264091	-2.04	0.000436331	1.54	0.00313196
PREDICTED: uncharacterized protein At5g39570 [Vitis vinifera]	XP_002283932.1	100252475	-1.03	0.0606963	2.81	0.000171346
PREDICTED: thioredoxin-like protein CDSP32, chloroplastic [Vitis vinifera]	XP_002285902.1	100259132	1.45	0.195939	5.46	0.000356862
PREDICTED: 40S ribosomal protein S17 [Vitis vinifera]	XP_002268997.1	100243000	0.394	0.383294	-2.13	0.000550186
PREDICTED: 30S ribosomal protein S1, chloroplastic [Vitis vinifera]	XP_002280604.1	100265325	1.69	0.00365559	2.39	0.000316758
PREDICTED: major allergen Pru av 1 [Vitis vinifera]	XP_002274617.1	100256795	-2.61	0.000275425	-1.24	0.0274992
PREDICTED: protein THYLAKOID FORMATION1, chloroplastic [Vitis vinifera]	XP_002275686.2	100259646	-0.145	0.766382	2.91	9.5845e-05
PREDICTED: U2 small nuclear ribonucleoprotein A' [Vitis vinifera]	XP_002275396.1	100264276	0.12	0.790257	-2.1	0.000677796
PREDICTED: MLP-like protein 423 [Vitis vinifera]	XP_002267219.1	100243241	4.25	5.28421e-07	-0.212	0.598014
PREDICTED: chloroplast stem-loop binding protein of 41 kDa a, chloroplastic [Vitis vinifera]	XP_002275066.1	100266662	-0.499	0.228184	2.48	6.93555e-05
PREDICTED: endo-1,3;1,4-beta-D-glucanase [Vitis vinifera]	XP_002275697.1	100257884	-5.25	6.93649e-05	0.225	0.789858
PREDICTED: RNA-binding protein 8A [Vitis vinifera]	XP_002281228.1	100260882	0.0433	0.913124	-2.17	0.000197475
PREDICTED: 26S protease regulatory subunit 6A homolog [Vitis vinifera]	XP_002271397.1	100256329	-0.828	0.308557	3.98	0.000387577
PREDICTED: psbP domain-containing protein 1, chloroplastic [Vitis vinifera]	XP_002281448.2	100259632	0.88	0.0598996	-1.94	0.000831282
unnamed protein product, partial [Vitis vinifera]	CBI39678.3	104881374	-0.759	0.377355	-4.64	0.000193088
PREDICTED: copper transport protein ATX1 [Vitis vinifera]	XP_002264332.1	100247137	3.84	0.000198043	-0.311	0.657976
PREDICTED: cysteine proteinase RD21A [Vitis vinifera]	XP_002285299.1	100252080	-2.26	0.000269799	-0.451	0.304681
PREDICTED: chaperone protein ClpB4, mitochondrial [Vitis vinifera]	XP_002282880.1	100247399	-3.74	0.000478459	1.63	0.0524681
PREDICTED: haloacid dehalogenase-like hydrolase domain-containing protein At3g48420 [Vitis vinifera]	XP_002277650.1	100253525	2.74	0.0120946	6.04	4.64126e-05
PREDICTED: ferredoxin--NADP reductase, leaf-type isozyme, chloroplastic [Vitis vinifera]	XP_002265774.1	100241976	-1.71	0.00930714	2.82	0.000335312
PREDICTED: glutamine synthetase leaf isozyme, chloroplastic [Vitis vinifera]	XP_002279497.1	100261413	0.379	0.45508	4.18	5.23317e-06
PREDICTED: trigger factor-like protein TIG, Chloroplastic [Vitis vinifera]	XP_002277545.1	100243475	0.178	0.8488	4.67	0.000399458
PREDICTED: thiol protease aleurain-like isoform X1 [Vitis vinifera]	XP_002278624.1	100244107	-6.62	1.00766e-06	-1.42	0.0528725
PREDICTED: 2-C-methyl-D-erythritol 4-phosphate cytidylyltransferase, chloroplastic [Vitis vinifera]	XP_002268908.1	100247263	-2.4	0.000530616	0.582	0.257611
PREDICTED: enolase 1 [Vitis vinifera]	XP_002283632.1	100242642	-1.22	0.0472359	3.29	0.000106877
PREDICTED: soluble inorganic pyrophosphatase 4 [Vitis vinifera]	XP_002278867.1	100258490	-2.06	0.0165782	4.73	5.40561e-05
PREDICTED: uncharacterized protein LOC100251922 [Vitis vinifera]	XP_002262747.1	100251922	4.35	0.000162694	-0.706	0.371644
PREDICTED: ruBisCO large subunit-binding protein subunit beta, chloroplastic [Vitis vinifera]	XP_002284134.1	100261815	1.42	0.0531556	3.09	0.000723485
PREDICTED: MAR-binding filament-like protein 1-1 isoform X1 [Vitis vinifera]	XP_002284745.2	100249815	3.85	6.22283e-06	2.21	0.000644685
PREDICTED: rho-N domain-containing protein 1, chloroplastic [Vitis vinifera]	XP_002277984.1	100261778	2.29	0.000210817	-1.36	0.00764504
PREDICTED: triosephosphate isomerase, chloroplastic [Vitis vinifera]	XP_002274871.1	100260576	-1.08	0.0966046	3.48	0.000139917
PREDICTED: glyceraldehyde-3-phosphate dehydrogenase B, chloroplastic [Vitis vinifera]	XP_002273754.1	100259814	-0.964	0.0191979	2.24	6.35056e-05
PREDICTED: uncharacterized protein LOC100258718 [Vitis vinifera]	XP_002280988.1	100258718	0.802	0.104914	2.1	0.000814801
PREDICTED: L-ascorbate peroxidase 2, cytosolic [Vitis vinifera]	XP_002284767.1	100233013	-1.05	0.017285	1.71	0.000882529
PREDICTED: ruBisCO large subunit-binding protein subunit beta, chloroplastic [Vitis vinifera]	XP_002285746.1	100263832	-0.428	0.439562	3.82	2.54371e-05
PREDICTED: probable L-ascorbate peroxidase 6, chloroplastic isoform X2 [Vitis vinifera]	XP_003634424.1	100254009	-0.526	0.355147	2.87	0.00032129
PREDICTED: small heat shock protein, chloroplastic [Vitis vinifera]	XP_002272418.1	100267630	-5.98	0.000339387	1.2	0.317694
PREDICTED: thiamine thiazole synthase 2, chloroplastic [Vitis vinifera]	XP_002267414.1	100265774	5.16	0.000159135	0.94	0.317316
PREDICTED: aspartic proteinase A1 [Vitis vinifera]	XP_002262915.2	100233021	-2.62	7.03509e-05	0.157	0.710974
PREDICTED: fructose-bisphosphate aldolase 1, chloroplastic [Vitis vinifera]	XP_003631873.1	100852851	-1.77	0.00219373	2.32	0.000308501
PREDICTED: soluble inorganic pyrophosphatase 1 [Vitis vinifera]	XP_002264695.2	100254798	-0.747	0.472261	4.78	0.000681857
PREDICTED: major allergen Pru ar 1 [Vitis vinifera]	XP_002273790.2	100253292	3.04	1.12317e-05	-1.47	0.00331208
PREDICTED: malate dehydrogenase, cytoplasmic [Vitis vinifera]	XP_002278636.2	100253273	-1.1	0.18243	4.25	0.000221036
PREDICTED: nascent polypeptide-associated complex subunit alpha-like protein 1 [Vitis vinifera]	XP_003632619.1	100243098	1.3	0.0198571	-2.19	0.000853281
PREDICTED: heat shock cognate 70 kDa protein 2 [Vitis vinifera]	XP_002283532.2	100254725	-0.821	0.21971	6.58	7.94461e-07
PREDICTED: nascent polypeptide-associated complex subunit alpha-like protein 2 [Vitis vinifera]	XP_003634163.1	100854239	3.41	0.000468658	-1.64	0.0355965
PREDICTED: clathrin light chain 1 [Vitis vinifera]	XP_003635272.1	100854215	2.1	0.000283761	-1.39	0.0050558
PREDICTED: superoxide dismutase [Cu-Zn] isoform X3 [Vitis vinifera]	XP_002268436.1	100241809	-2.22	0.000596295	-0.225	0.632118
lipid transfer protein precursor [Vitis vinifera]	NP_001268074.1	100233106	-5.67	1.95715e-05	1.09	0.186516
serine/threonine kinase-like [Vitis vinifera]	NP_001268124.1	100232874	1.48	0.0026998	-2.1	0.000215569
uncharacterized protein LOC100267074 [Vitis vinifera]	NP_001267956.1	100267074	-4.29	6.2633e-07	0.0715	0.861549
PREDICTED: hsp70-Hsp90 organizing protein 3 [Vitis vinifera]	XP_003635686.2	100855394	0.581	0.264304	3.45	3.07715e-05
putative ripening-related protein [Vitis vinifera]	CAB85626.1	100232885	0.534	0.209533	-2.44	0.000101183
PREDICTED: major allergen Pru av 1 [Vitis vinifera]	XP_002274309.1	100244758	-2.77	0.0116221	1.51	0.125244
PREDICTED: stromal cell-derived factor 2-like protein [Vitis vinifera]	XP_002271807.1	100260264	0.288	0.826868	-0.659	0.618471
PREDICTED: uncharacterized protein LOC100249037 [Vitis vinifera]	XP_002274820.2	100249037	0.185	0.819638	0.437	0.592904
PREDICTED: NAD(P)H-quinone oxidoreductase subunit S, chloroplastic [Vitis vinifera]	XP_002269912.1	100253040	0.3	0.560271	-0.581	0.269603
PREDICTED: psbP domain-containing protein 2, chloroplastic isoform X2 [Vitis vinifera]	XP_002274735.2		-0.934	0.575218	-3.02	0.0901845
hypothetical protein VITISV_005075 [Vitis vinifera]	CAN69889.1	100249863	-1.68	0.120663	-0.793	0.441939
PREDICTED: uncharacterized protein LOC100249521 [Vitis vinifera]	XP_002270877.1	100249521	3.02	0.0584745	3.89	0.0202954
PREDICTED: serine carboxypeptidase 1 [Vitis vinifera]	XP_002264454.2	100258524	1.01	0.392451	2.02	0.103855
hypothetical protein VITISV_030335 [Vitis vinifera]	CAN62864.1		-4.24	0.00337801	0.29	0.801205
PREDICTED: squamosa promoter-binding protein 1 isoform X2 [Vitis vinifera]	XP_002280052.1	100250271	0.00211	0.998147	-0.0832	0.927089
hypothetical protein VITISV_017918 [Vitis vinifera]	CAN67380.1	100233095	-2.26	0.151656	2.96	0.068816
hypothetical protein VITISV_008571 [Vitis vinifera]	CAN62909.1		-0.746	0.199119	-1.42	0.0253904
PREDICTED: uncharacterized protein LOC100241189 [Vitis vinifera]	XP_002265546.1	100241189	0.205	0.852157	2.07	0.0810659
PREDICTED: 60S acidic ribosomal protein P2 isoform X1 [Vitis vinifera]	XP_002266030.2	100241445	0.382	0.364899	-0.371	0.378683
PREDICTED: oxygen-dependent coproporphyrinogen-III oxidase, chloroplastic [Vitis vinifera]	XP_002263190.1	100243271	0.558	0.651248	3.03	0.0291833
PREDICTED: thiosulfate sulfurtransferase 16, chloroplastic [Vitis vinifera]	XP_002271073.3	100259157	0.942	0.0248765	0.986	0.0201504
PREDICTED: photosystem I reaction center subunit II, chloroplastic [Vitis vinifera]	XP_002278284.1	100242600	0.36	0.763054	0.591	0.621625
PREDICTED: pathogenesis-related protein PR-4 [Vitis vinifera]	XP_002264720.1	100255405	-0.912	0.182517	-0.623	0.351225
PREDICTED: ferritin-3, chloroplastic [Vitis vinifera]	XP_002277114.1	100267235	0.684	0.180815	-1.11	0.0414939
hypothetical protein VITISV_012048 [Vitis vinifera]	CAN69132.1		-1.43	0.0117831	-1.33	0.0169103
PREDICTED: uncharacterized protein LOC104877681 [Vitis vinifera]	XP_010644754.1		-1.85	0.417175	1.17	0.605351
PREDICTED: violaxanthin de-epoxidase, chloroplastic [Vitis vinifera]	XP_002267152.1	100257865	-1.89	0.202117	1.96	0.186405
hypothetical protein VITISV_004512 [Vitis vinifera]	CAN59845.1	100265296	0.408	0.54472	1.15	0.106494
PREDICTED: psbP domain-containing protein 5, chloroplastic [Vitis vinifera]	XP_002284586.1	100252532	1.76	0.180693	-2.29	0.0913044
PREDICTED: uncharacterized protein LOC100244206 [Vitis vinifera]	XP_002282517.1	100244206	1.28	0.329079	3.92	0.0101528
PREDICTED: oxygen-evolving enhancer protein 1, chloroplastic [Vitis vinifera]	XP_002274796.1	100245459	0.252	0.515941	-0.0278	0.942186
PREDICTED: subtilisin-like protease SBT1.4 [Vitis vinifera]	XP_002272769.1	100251409	1.18	0.527721	-2.51	0.191957
PREDICTED: 17.3 kDa class II heat shock protein [Vitis vinifera]	XP_002280647.1	100245734	1.09	0.392952	0.0925	0.94112
PREDICTED: 40S ribosomal protein S28 [Vitis vinifera]	XP_002281508.3	100246987	0.901	0.535453	-0.829	0.567746
PREDICTED: NADH dehydrogenase [ubiquinone] flavoprotein 2, mitochondrial [Vitis vinifera]	XP_002281655.1	100242595	-1.12	0.256351	2.39	0.0279742
PREDICTED: 40S ribosomal protein S29 [Vitis vinifera]	XP_002277856.1	100262886	1.04	0.337945	1.27	0.247799
PREDICTED: ATP-dependent zinc metalloprotease FTSH, chloroplastic [Vitis vinifera]	XP_002285925.1	100250509	1.42	0.250189	1.73	0.166163
hypothetical protein VITISV_027349 [Vitis vinifera]	CAN65010.1	104880199	0.734	0.340481	2.11	0.0162242
PREDICTED: 60S ribosomal protein L27a-3 [Vitis vinifera]	XP_002272813.2		1.39	0.385123	-3.04	0.0749586
PREDICTED: thioredoxin [Vitis vinifera]	XP_002266022.1	100264263	0.703	0.120323	1.06	0.0285501
PREDICTED: pinin [Vitis vinifera]	XP_002265691.1	100245237	-0.535	0.612162	-1.56	0.157155
PREDICTED: stromal 70 kDa heat shock-related protein, chloroplastic [Vitis vinifera]	XP_002282802.1	100248235	-2.64	0.00578694	-0.941	0.244274
PREDICTED: probable WRKY transcription factor 20 isoform X1 [Vitis vinifera]	XP_002272407.1	100256306	1.72	0.0379321	1.76	0.0340543
hypothetical protein VITISV_041925 [Vitis vinifera]	CAN60148.1	100265397	-0.976	0.124429	-0.38	0.529326
PREDICTED: psbP domain-containing protein 3, chloroplastic [Vitis vinifera]	XP_002273332.1	100263326	-0.106	0.898229	-2.21	0.0208747
PREDICTED: protein FLX-like 3 [Vitis vinifera]	XP_002278937.2	100253153	0.296	0.542674	-1.89	0.00226659
PREDICTED: NAD(P)H-quinone oxidoreductase subunit U, chloroplastic [Vitis vinifera]	XP_002281227.1	100257708	0.292	0.734583	1.48	0.1078
PREDICTED: secoisolariciresinol dehydrogenase-like [Vitis vinifera]	XP_002272838.1	100248353	0.468	0.606197	1.97	0.0488778
PREDICTED: adenosine kinase 2 [Vitis vinifera]	XP_002272669.1	100241094	1.94	0.000875407	0.11	0.798158
hypothetical protein VITISV_022886 [Vitis vinifera]	CAN70311.1		-4.43	0.000718351	-0.0505	0.957894
PREDICTED: eukaryotic translation initiation factor 1A [Vitis vinifera]	XP_002285844.1	100252402	1.43	0.430977	-1.48	0.414271
PREDICTED: 14 kDa zinc-binding protein isoform X1 [Vitis vinifera]	XP_002276515.1	100242206	-1.26	0.441068	1.34	0.414267
PREDICTED: DNA damage-inducible protein 1 [Vitis vinifera]	XP_002276099.1	100248128	1.22	0.19908	1.72	0.0824449
hypothetical protein VITISV_038770 [Vitis vinifera]	CAN74125.1	100251971	0.732	0.240851	0.697	0.262091
PREDICTED: reactive Intermediate Deaminase A, chloroplastic [Vitis vinifera]	XP_002280251.1	100265829	-1.69	0.169768	0.847	0.477094
PREDICTED: peptidyl-prolyl cis-trans isomerase FKBP17-2, chloroplastic [Vitis vinifera]	XP_003634204.1	100853930	2.72	0.0137094	0.731	0.443629
hypothetical protein VITISV_014971 [Vitis vinifera]	CAN60554.1	100264572	0.493	0.421889	-1.79	0.0121495
PREDICTED: uncharacterized protein LOC100258138 isoform X1 [Vitis vinifera]	XP_002266002.1	100258138	3.22	0.0489725	-0.291	0.844281
PREDICTED: polyadenylate-binding protein 2 [Vitis vinifera]	XP_002279148.1	100242522	1.7	0.0124387	-1.31	0.0406385
PREDICTED: uncharacterized protein LOC100245470 [Vitis vinifera]	XP_002279226.1	100245470	-3.26	0.00584232	-1.92	0.0678176
hypothetical protein VITISV_005665 [Vitis vinifera]	CAN63754.1	100232888	1.06	0.512446	2.86	0.096094
hypothetical protein VITISV_035042 [Vitis vinifera]	CAN68405.1	100246364	-0.769	0.207405	-1.49	0.0253245
PREDICTED: adenylate kinase, chloroplastic [Vitis vinifera]	XP_003634590.1	100853175	0.453	0.766248	2.16	0.1759
PREDICTED: probable plastid-lipid-associated protein 6, chloroplastic [Vitis vinifera]	XP_002285326.1	100254627	-1.13	0.014584	-0.579	0.163847
PREDICTED: 17.3 kDa class II heat shock protein [Vitis vinifera]	XP_002280632.1	100250883	2.18	0.173595	1.6	0.306478
PREDICTED: FAM10 family protein At4g22670 [Vitis vinifera]	XP_010646815.1		0.392	0.421503	-0.258	0.594258
PREDICTED: protein FLX-like 1 [Vitis vinifera]	XP_002267059.2		0.172	0.851712	1.2	0.20885
hypothetical protein VITISV_003301 [Vitis vinifera]	CAN75427.1	100242352	1.01	0.471638	1.07	0.445154
PREDICTED: calmodulin-7 isoform X2 [Vitis vinifera]	XP_003632229.1	100261610	0.283	0.534654	-1.15	0.0253625
hypothetical protein VITISV_019336 [Vitis vinifera]	CAN60921.1		0.698	0.689123	2.74	0.136635
PREDICTED: craniofacial development protein 1 [Vitis vinifera]	XP_002262955.1	100251180	0.98	0.348118	-0.101	0.921444
hypothetical protein VITISV_013832 [Vitis vinifera]	CAN64354.1	100265618	1.29	0.243227	-0.541	0.614107
hypothetical protein VITISV_010071 [Vitis vinifera]	CAN79971.1	100243229	0.508	0.344002	-0.554	0.304371
PREDICTED: vacuolar protein sorting-associated protein 2 homolog 1 [Vitis vinifera]	XP_002280053.1	100255989	-0.531	0.681313	0.91	0.485173
PREDICTED: carotenoid 9,10(9',10')-cleavage dioxygenase 1 [Vitis vinifera]	XP_002278628.1	100249903	0.152	0.905889	-0.704	0.587641
PREDICTED: uncharacterized protein LOC100241260 [Vitis vinifera]	XP_002268728.2	100241260	2.5	0.148071	1.16	0.48446
PREDICTED: uncharacterized protein LOC100250997 [Vitis vinifera]	XP_002285183.2		-0.731	0.171576	-0.781	0.14693
PREDICTED: 30S ribosomal protein S31, chloroplastic [Vitis vinifera]	XP_002274396.3	100258002	4	0.0155873	0.531	0.709168
hypothetical protein VITISV_016403 [Vitis vinifera]	CAN81311.1	100265039	-0.175	0.772165	-1.95	0.00746887
hypothetical protein VITISV_017654 [Vitis vinifera]	CAN82383.1		-1.78	0.00120677	-0.255	0.539841
PREDICTED: probable aldo-keto reductase 2 [Vitis vinifera]	XP_002265775.1	100251429	-0.192	0.858288	1.27	0.253939
PREDICTED: photosynthetic NDH subunit of lumenal location 5, chloroplastic [Vitis vinifera]	XP_002265030.2	100248997	-2.67	0.000938555	-0.138	0.817586
hypothetical protein VITISV_030871 [Vitis vinifera]	CAN82836.1		1.81	0.0194785	-0.492	0.468787
hypothetical protein VITISV_012500 [Vitis vinifera]	CAN80823.1	100232920	-0.775	0.297642	-0.813	0.276021
hypothetical protein VITISV_006764 [Vitis vinifera]	CAN81046.1	100258713	2.56	0.112867	0.189	0.900702
PREDICTED: protein TOC75-3, chloroplastic [Vitis vinifera]	XP_002280661.1	100263897	0.863	0.0869515	-0.0615	0.895372
hypothetical protein VITISV_013098 [Vitis vinifera]	CAN80447.1	100241624	0.238	0.730346	-1.1	0.132686
PREDICTED: peptide methionine sulfoxide reductase B5 [Vitis vinifera]	XP_002265129.2	100264443	0.0275	0.942089	1.04	0.0173306
PREDICTED: psbP domain-containing protein 6, chloroplastic [Vitis vinifera]	XP_002283307.1		0.272	0.45576	0.694	0.0757945
PREDICTED: ATP sulfurylase 2 [Vitis vinifera]	XP_002276993.1	100252345	0.0201	0.981202	3.05	0.00414453
hypothetical protein VITISV_006478 [Vitis vinifera]	CAN83041.1		-1.88	0.438747	0.421	0.859875
PREDICTED: protein PROTON GRADIENT REGULATION 5, chloroplastic [Vitis vinifera]	XP_002285437.1	100254512	-0.752	0.467852	1.55	0.14935
PREDICTED: RNA polymerase II degradation factor 1 [Vitis vinifera]	XP_002283405.1	100250808	0.259	0.802376	1.49	0.171288
RecName: Full=S-adenosylmethionine synthase 4; Short=AdoMet synthase 4; AltName: Full=Methionine adenosyltransferase 4; Short=MAT 4	A7PRJ6.1	100251171	-0.0217	0.987694	0.325	0.817344
PREDICTED: nodulin-related protein 1 [Vitis vinifera]	XP_002271911.1	100262861	1.03	0.156352	0.0664	0.923715
PREDICTED: dihydrolipoyllysine-residue acetyltransferase component 4 of pyruvate dehydrogenase complex, chloroplastic [Vitis vinifera]	XP_002282287.1	100261197	-2.69	0.0542765	0.967	0.453322
PREDICTED: eukaryotic translation initiation factor 4B2 [Vitis vinifera]	XP_002285504.1	100242447	0.28	0.766437	-0.462	0.624538
PREDICTED: mitochondrial outer membrane protein porin of 36 kDa [Vitis vinifera]	XP_002276636.1	100248362	-0.0598	0.917572	0.996	0.106723
PREDICTED: non-specific lipid transfer protein GPI-anchored 1 [Vitis vinifera]	XP_002277578.1	100259092	0.511	0.737741	0.892	0.560845
PREDICTED: calvin cycle protein CP12-1, chloroplastic [Vitis vinifera]	XP_002275043.1	100267103	-0.193	0.816239	1.04	0.225395
PREDICTED: protein indeterminate-domain 5, chloroplastic isoform X1 [Vitis vinifera]	XP_002268279.1	100251079	0.106	0.9091	0.557	0.55339
PREDICTED: 30S ribosomal protein S6 alpha, chloroplastic [Vitis vinifera]	XP_002264340.1	100244408	0.374	0.808818	1.02	0.513368
PREDICTED: uncharacterized protein LOC100254752 [Vitis vinifera]	XP_002277018.1	100254752	-0.323	0.426681	-0.834	0.0576261
PREDICTED: uncharacterized protein LOC100261574 [Vitis vinifera]	XP_002282656.1	100261574	0.637	0.493404	0.308	0.737901
PREDICTED: protein P21 [Vitis vinifera]	XP_002283030.1	100259841	2.31	0.0336964	3.03	0.0090328
PREDICTED: protein P21 [Vitis vinifera]	XP_002283042.1	100254732	-0.632	0.496258	-1.61	0.100953
PREDICTED: plant UBX domain-containing protein 8 [Vitis vinifera]	XP_002276758.1	100251323	-0.362	0.652622	-1.47	0.0890575
PREDICTED: fructose-bisphosphate aldolase 1, chloroplastic [Vitis vinifera]	XP_002267726.1	100262354	-1.63	0.0037584	1.36	0.010522
PREDICTED: eukaryotic translation initiation factor 4B3 [Vitis vinifera]	XP_002275899.1	100262348	2.17	0.0442792	-0.98	0.324871
PREDICTED: glycine-rich protein 2 [Vitis vinifera]	XP_002277628.1	100259004	-0.318	0.886852	0.66	0.768307
PREDICTED: 40S ribosomal protein S25-2 [Vitis vinifera]	XP_002283830.1	100258834	0.174	0.873129	-3.79	0.00489557
PREDICTED: polyadenylate-binding protein 2 isoform X1 [Vitis vinifera]	XP_002285190.1	100241923	0.448	0.701007	3.32	0.0145917
PREDICTED: heat shock 70 kDa protein, mitochondrial isoform X1 [Vitis vinifera]	XP_002263457.1	100250929	-2.1	0.022046	2.12	0.0209744
PREDICTED: upstream activation factor subunit spp27 [Vitis vinifera]	XP_002272147.1	100242279	-0.849	0.495541	1.37	0.280771
PREDICTED: putative 4-hydroxy-4-methyl-2-oxoglutarate aldolase 2 [Vitis vinifera]	XP_002277981.1	100263339	-0.0246	0.963424	1.49	0.0170282
PREDICTED: actin-7 [Vitis vinifera]	XP_002282516.1	100232866	-2.63	0.00316469	2.03	0.0140355
PREDICTED: transcription factor 25 homolog [Vitis vinifera]	XP_002282783.1		-1.65	0.326572	-0.492	0.764466
PREDICTED: major allergen Pru av 1 [Vitis vinifera]	XP_002274242.1	100249884	-1.36	0.00963027	0.443	0.326984
PREDICTED: dihydrolipoyl dehydrogenase, mitochondrial [Vitis vinifera]	XP_002263180.1	100246037	0.494	0.758702	6.56	0.00174458
PREDICTED: photosystem I reaction center subunit II, chloroplastic [Vitis vinifera]	XP_002281825.1	100240928	-0.378	0.352378	-0.638	0.130221
PREDICTED: heterogeneous nuclear ribonucleoprotein 1 [Vitis vinifera]	XP_002285419.1	100257917	1.54	0.101973	-1.97	0.0434306
PREDICTED: uncharacterized protein LOC100246892 [Vitis vinifera]	XP_002270599.1		-0.32	0.547358	-1.23	0.0371749
PREDICTED: uncharacterized protein LOC100247585 [Vitis vinifera]	XP_002275949.1	100247585	0.616	0.647648	1.04	0.446135
PREDICTED: uncharacterized protein LOC100266227 isoform X2 [Vitis vinifera]	XP_002280489.1	100266227	-1.73	0.0386464	1.23	0.122276
PREDICTED: CBS domain-containing protein CBSX3, mitochondrial [Vitis vinifera]	XP_002262956.1	100265678	-0.351	0.570088	0.00658	0.991434
PREDICTED: ran-binding protein 1 homolog b [Vitis vinifera]	XP_002276692.1	100257001	2.3	0.0823527	3.21	0.0222878
PREDICTED: eukaryotic translation initiation factor 3 subunit G-B [Vitis vinifera]	XP_002282278.1	100265545	2.27	0.088815	1.94	0.137757
PREDICTED: protein TIC 62, chloroplastic isoform X2 [Vitis vinifera]	XP_002282730.1		1.42	0.00473602	-0.104	0.797875
PREDICTED: chaperone protein DnaJ isoform X2 [Vitis vinifera]	XP_002282790.1	100258713	0.928	0.24477	-0.839	0.290254
PREDICTED: probable histone H2B.1 [Vitis vinifera]	XP_002284277.1	100251955	0.682	0.461298	-1.2	0.206084
PREDICTED: actin-depolymerizing factor 2 [Vitis vinifera]	XP_002284292.1	100246819	-4.15	0.00191756	2.86	0.0168547
PREDICTED: 60S ribosomal protein L35 [Vitis vinifera]	XP_002284495.1	100246718	0.488	0.677797	-0.594	0.613602
PREDICTED: enoyl-[acyl-carrier-protein] reductase [NADH], chloroplastic [Vitis vinifera]	XP_002285625.1	100241680	-1.12	0.398987	1.83	0.17878
PREDICTED: uncharacterized protein LOC100241562 [Vitis vinifera]	XP_002285744.1	100241562	1.62	0.0027682	0.951	0.04361
PREDICTED: uncharacterized protein LOC100263360 [Vitis vinifera]	XP_002273249.1	100263360	0.254	0.494261	-0.325	0.385958
PREDICTED: 50S ribosomal protein L3, chloroplastic [Vitis vinifera]	XP_002271466.1	100267754	2.36	0.0224479	-2.31	0.0249103
PREDICTED: photosystem I chlorophyll a/b-binding protein 3-1, chloroplastic [Vitis vinifera]	XP_002273201.1	100232927	-0.636	0.201725	-0.538	0.274803
PREDICTED: 40S ribosomal protein S15 [Vitis vinifera]	XP_002282294.1	100263010	0.764	0.706104	1.65	0.422467
PREDICTED: uncharacterized protein OsI_027940 isoform X1 [Vitis vinifera]	XP_002264898.1	100258848	2.52	0.044669	-0.797	0.485192
PREDICTED: phosphoribosylformylglycinamidine cyclo-ligase, chloroplastic [Vitis vinifera]	XP_002275035.1		0.127	0.897174	1.25	0.217533
PREDICTED: S-adenosylmethionine synthase 5 [Vitis vinifera]	XP_002280106.1	100243560	0.823	0.472652	4.32	0.00274397
PREDICTED: heterogeneous nuclear ribonucleoprotein 1-like [Vitis vinifera]	XP_002274734.1		0.364	0.283827	-1.33	0.00186156
PREDICTED: H/ACA ribonucleoprotein complex subunit 1 [Vitis vinifera]	XP_002277849.1	100254260	-2.09	0.0500815	-4.04	0.00147931
PREDICTED: nudix hydrolase 26, chloroplastic isoform X1 [Vitis vinifera]	XP_002263671.1	100253524	3.18	0.0123894	0.568	0.60036
PREDICTED: V-type proton ATPase subunit E1 [Vitis vinifera]	XP_002270168.1	100248521	-1.7	0.25313	3.8	0.0217082
PREDICTED: uncharacterized protein LOC100251893 isoform X1 [Vitis vinifera]	XP_002267243.1	100251893	0.205	0.65714	0.302	0.515722
PREDICTED: macrophage migration inhibitory factor homolog isoform X2 [Vitis vinifera]	XP_002263560.1	100256897	0.433	0.646247	2.74	0.0129879
PREDICTED: protein MODIFIER OF SNC1 11 isoform X1 [Vitis vinifera]	XP_002276541.1	100249849	1.22	0.0127958	-1.8	0.00121272
PREDICTED: 60S ribosomal protein L12 [Vitis vinifera]	XP_002281255.1	100267052	0.492	0.300203	-0.159	0.73119
PREDICTED: 29 kDa ribonucleoprotein A, chloroplastic [Vitis vinifera]	XP_002281642.1	100246501	1.92	0.00064391	-1.8	0.00103317
PREDICTED: hsp70-binding protein 1 [Vitis vinifera]	XP_002269511.1	100261411	3.03	0.00648287	0.472	0.607907
PREDICTED: cell division protein FtsZ homolog 2-1, chloroplastic [Vitis vinifera]	XP_002282740.1	100251032	0.122	0.771854	-1.39	0.00653005
PREDICTED: fructose-bisphosphate aldolase 1, cytoplasmic [Vitis vinifera]	XP_002283381.1	100245998	-1.67	0.185932	2.48	0.0605506
PREDICTED: uncharacterized protein LOC100255580 [Vitis vinifera]	XP_002284462.1	100255580	-1.42	0.308837	1.32	0.344773
PREDICTED: proteasome subunit alpha type-5 [Vitis vinifera]	XP_002265563.1	100263432	-0.623	0.47758	3.45	0.00204658
PREDICTED: 60S ribosomal protein L9 [Vitis vinifera]	XP_002276785.1	100253227	-0.34	0.585144	-0.207	0.738138
PREDICTED: 30S ribosomal protein S17, chloroplastic [Vitis vinifera]	XP_002284468.1	100251530	1.99	0.00554201	0.407	0.49176
PREDICTED: methyl-CpG-binding domain-containing protein 11 [Vitis vinifera]	XP_002267149.1	100249094	-0.201	0.741322	0.674	0.280565
PREDICTED: uncharacterized protein LOC100263834 [Vitis vinifera]	XP_002271931.1	100263834	-2.87	0.0168507	4.04	0.00234631
PREDICTED: cell wall integrity protein scw1 [Vitis vinifera]	XP_002273578.1	100263943	-0.166	0.850072	0.609	0.491829
PREDICTED: ATP synthase subunit epsilon, mitochondrial [Vitis vinifera]	XP_002274249.1	100248446	0.196	0.904931	0.592	0.719023
PREDICTED: pyruvate dehydrogenase E1 component subunit alpha, mitochondrial [Vitis vinifera]	XP_002274285.1	100243322	1.18	0.189712	2	0.0385098
PREDICTED: magnesium-chelatase subunit ChlI, chloroplastic [Vitis vinifera]	XP_002276262.1	100267459	2.78	0.0919268	2.35	0.147039
PREDICTED: stress-response A/B barrel domain-containing protein UP3-like [Vitis vinifera]	XP_002279728.1	100259336	0.0176	0.986937	1.28	0.248993
PREDICTED: stress-response A/B barrel domain-containing protein UP3-like [Vitis vinifera]	XP_002279848.1	100249118	-0.994	0.272689	1.91	0.0491928
PREDICTED: 60S ribosomal protein L31 [Vitis vinifera]	XP_002282984.1	100267870	1.56	0.182465	1.14	0.320071
PREDICTED: uncharacterized protein LOC100262932 [Vitis vinifera]	XP_002280712.1	100262932	0.703	0.331772	1.67	0.0356952
PREDICTED: methyl-CpG-binding domain-containing protein 11 isoform X1 [Vitis vinifera]	XP_002285323.1	100259445	0.116	0.773165	-0.953	0.035204
PREDICTED: biotin carboxylase 1, chloroplastic [Vitis vinifera]	XP_002266489.1	100251795	0.205	0.864176	2.04	0.110896
PREDICTED: 40S ribosomal protein S12 [Vitis vinifera]	XP_002279327.1	100265590	1.41	0.152031	2.93	0.0090728
PREDICTED: ATP-dependent zinc metalloprotease FTSH 2, chloroplastic [Vitis vinifera]	XP_002282107.1	100250511	-0.182	0.646539	1.28	0.00754459
PREDICTED: ATP-dependent Clp protease proteolytic subunit 4, chloroplastic [Vitis vinifera]	XP_002282652.1	100254000	0.0657	0.901378	-1.45	0.0180424
PREDICTED: chlorophyll a-b binding protein of LHCII type 1 [Vitis vinifera]	XP_002283566.1	100250504	-1.59	0.00317147	-0.893	0.057144
PREDICTED: photosystem II repair protein PSB27-H1, chloroplastic [Vitis vinifera]	XP_002277789.1	100263742	0.754	0.140868	-1.15	0.0345727
PREDICTED: chlorophyll a-b binding protein 151, chloroplastic [Vitis vinifera]	XP_002271687.1	100254533	-0.0543	0.968882	0.45	0.747119
PREDICTED: chlorophyll a-b binding protein CP24 10A, chloroplastic [Vitis vinifera]	XP_002263201.1	100241887	0.245	0.762419	0.082	0.919177
PREDICTED: ferredoxin-like [Vitis vinifera]	XP_002269617.1	100249080	3.52	0.26132	2.99	0.335117
PREDICTED: clathrin light chain 2 [Vitis vinifera]	XP_002269465.1	100248438	0.277	0.500777	-0.956	0.0360516
PREDICTED: 50S ribosomal protein L10, chloroplastic [Vitis vinifera]	XP_002281167.1	100245108	2.27	0.0588645	0.599	0.587363
PREDICTED: cytochrome c oxidase subunit 6b-1 isoform X3 [Vitis vinifera]	XP_002281992.1	100263948	-0.613	0.333838	-0.49	0.436534
PREDICTED: elongation factor 1-alpha [Vitis vinifera]	XP_002277159.1	100261589	-3.06	0.0178718	2.57	0.0387441
PREDICTED: ATP synthase subunit d, mitochondrial [Vitis vinifera]	XP_002277452.1	100241092	-0.506	0.225182	-1.38	0.00522881
PREDICTED: eukaryotic translation initiation factor 3 subunit G [Vitis vinifera]	XP_002282439.1	100251333	0.861	0.210404	1.68	0.0256636
PREDICTED: ribulose bisphosphate carboxylase/oxygenase activase, chloroplastic [Vitis vinifera]	XP_002282979.1	100266698	1.84	0.00195807	1.06	0.0392578
PREDICTED: 15.7 kDa heat shock protein, peroxisomal [Vitis vinifera]	XP_002283860.1	100254799	3.9	0.0154586	-1.18	0.40251
PREDICTED: histone H4 [Vitis vinifera]	XP_002283894.1		0.0284	0.948434	-1.92	0.00110631
PREDICTED: 60S ribosomal protein L23a [Vitis vinifera]	XP_002284261.1	100254719	-0.361	0.622827	-1.92	0.0216021
PREDICTED: photosystem II 5 kDa protein, chloroplastic [Vitis vinifera]	XP_002277909.1	100265352	-1.76	0.0965965	-0.565	0.569936
PREDICTED: thylakoid lumenal 19 kDa protein, chloroplastic [Vitis vinifera]	XP_002275752.1	100261871	0.125	0.851044	0.801	0.242774
PREDICTED: histone H3.2 [Vitis vinifera]	XP_002264961.1	100263009	-4.88	0.00871851	-1.82	0.254773
PREDICTED: uncharacterized protein LOC100249460 [Vitis vinifera]	XP_002270910.1	100249460	2	0.0043887	-0.476	0.40812
PREDICTED: glyceraldehyde-3-phosphate dehydrogenase A, chloroplastic [Vitis vinifera]	XP_002278352.1	100246378	-0.167	0.677189	1.64	0.0016661
PREDICTED: 14-3-3-like protein A [Vitis vinifera]	XP_002283492.1	100259987	-1.25	0.200646	0.675	0.475398
PREDICTED: 40S ribosomal protein S7 [Vitis vinifera]	XP_002283918.1	100241243	-0.0165	0.986486	-2.67	0.0177534
PREDICTED: 50S ribosomal protein L12, chloroplastic [Vitis vinifera]	XP_002277258.1	100257626	1.11	0.412126	1.13	0.404506
PREDICTED: malate dehydrogenase, chloroplastic-like [Vitis vinifera]	XP_002283619.1	100247511	2.04	0.0922404	2.38	0.0550866
PREDICTED: probable mitochondrial-processing peptidase subunit beta, mitochondrial [Vitis vinifera]	XP_002284370.1	100259477	-2.75	0.00531099	0.036	0.964142
PREDICTED: ATP-dependent Clp protease proteolytic subunit 3, chloroplastic [Vitis vinifera]	XP_002271649.1	100265683	0.554	0.676466	0.63	0.635642
PREDICTED: nucleoside diphosphate kinase B [Vitis vinifera]	XP_002271352.1	100258184	-0.145	0.68301	-0.727	0.0611158
PREDICTED: acetyl-coenzyme A carboxylase carboxyl transferase subunit alpha, chloroplastic [Vitis vinifera]	XP_002269834.1	100256854	-2.59	0.036128	2.01	0.0901649
PREDICTED: uncharacterized protein LOC100247770 isoform X1 [Vitis vinifera]	XP_002274959.1	100247770	-0.748	0.41886	-2.82	0.00948287
PREDICTED: NADH dehydrogenase [ubiquinone] 1 beta subcomplex subunit 10-B [Vitis vinifera]	XP_002276810.1	100250756	0.134	0.731117	-0.692	0.096452
PREDICTED: stromal 70 kDa heat shock-related protein, chloroplastic [Vitis vinifera]	XP_002279101.1	100249184	0.479	0.288734	1.36	0.0096434
PREDICTED: ATP synthase subunit beta, mitochondrial [Vitis vinifera]	XP_002280824.1	100259544	-1.45	0.00565653	1.16	0.0187316
PREDICTED: elongation factor 1-delta [Vitis vinifera]	XP_002283673.1	100252524	-0.452	0.222016	0.768	0.0508078
PREDICTED: elongation factor TuB, chloroplastic [Vitis vinifera]	XP_002277301.1	100244975	-0.922	0.0405192	1.72	0.00130856
PREDICTED: uncharacterized protein LOC100246777 [Vitis vinifera]	XP_002282612.1	100246777	1.78	0.147693	-0.396	0.735412
PREDICTED: glycine-rich RNA-binding protein blt801 [Vitis vinifera]	XP_002284026.1	100256940	0.114	0.948834	1.19	0.509581
PREDICTED: ribulose-phosphate 3-epimerase, chloroplastic [Vitis vinifera]	XP_002284772.1	100267206	-0.135	0.935197	1.73	0.309978
PREDICTED: SKP1-like protein 1B [Vitis vinifera]	XP_002270061.1	100252349	0.983	0.222999	1.68	0.049711
PREDICTED: peptidyl-prolyl cis-trans isomerase [Vitis vinifera]	XP_002274869.1	100247119	-1.71	0.00141728	1.62	0.0020486
PREDICTED: proteoglycan 4 [Vitis vinifera]	XP_002281318.1	100250577	-0.909	0.211043	-0.304	0.664634
PREDICTED: oxygen-evolving enhancer protein 1, chloroplastic [Vitis vinifera]	XP_002283699.1	100260811	0.91	0.0872689	-1	0.0633642
PREDICTED: uncharacterized protein LOC100255721 [Vitis vinifera]	XP_002285601.1	100255721	1.28	0.219151	2.22	0.045451
PREDICTED: uncharacterized protein LOC100257445 [Vitis vinifera]	XP_002285622.1	100257445	-0.424	0.610677	-2.13	0.0243541
PREDICTED: 22.0 kDa class IV heat shock protein [Vitis vinifera]	XP_002263376.1	100263588	-3.19	0.0175099	-2.81	0.0312185
PREDICTED: ATP synthase delta chain, chloroplastic [Vitis vinifera]	XP_002274963.1	100251062	0.109	0.759525	1	0.0154991
PREDICTED: heterogeneous nuclear ribonucleoprotein 1 [Vitis vinifera]	XP_002277226.1	100246013	0.991	0.0166306	-1.09	0.0103587
PREDICTED: cytochrome b-c1 complex subunit 6 [Vitis vinifera]	XP_002269910.1	100253774	-0.858	0.321383	-1.53	0.0920792
PREDICTED: 14-3-3-like protein D [Vitis vinifera]	XP_002285427.1	100250345	-0.632	0.324206	0.288	0.647141
PREDICTED: heterogeneous nuclear ribonucleoprotein 1 [Vitis vinifera]	XP_002271592.1	100265210	0.19	0.68029	-1.03	0.0431333
PREDICTED: proteasome subunit alpha type-4 [Vitis vinifera]	XP_002266877.1	100251448	-0.993	0.287226	-1.1	0.242688
PREDICTED: thioredoxin X, chloroplastic [Vitis vinifera]	XP_002268262.1	100242924	-0.0511	0.977828	2.39	0.211783
PREDICTED: uncharacterized protein OsI_027940 [Vitis vinifera]	XP_002265220.1	100264829	0.0227	0.98606	0.823	0.530253
PREDICTED: DNA-binding protein DDB_G0278111 [Vitis vinifera]	XP_002274043.1	100245316	0.0591	0.950072	-0.871	0.365875
PREDICTED: sufE-like protein 1, chloroplastic/mitochondrial [Vitis vinifera]	XP_002263467.1	100242888	1.18	0.406678	-1.48	0.302108
PREDICTED: ferredoxin-thioredoxin reductase, variable chain [Vitis vinifera]	XP_002271306.1	100257686	0.809	0.0741302	-1.41	0.00590147
PREDICTED: cysteine proteinase inhibitor 12 [Vitis vinifera]	XP_002267841.1	100260839	-1.36	0.0847399	-1.59	0.0482933
PREDICTED: protein SRC2 homolog [Vitis vinifera]	XP_002271267.1	100249100	-1.01	0.176288	-0.63	0.38431
PREDICTED: 50S ribosomal protein L31, chloroplastic-like [Vitis vinifera]	XP_002272548.1		-0.817	0.604688	-1.57	0.329171
PREDICTED: uncharacterized protein At2g27730, mitochondrial [Vitis vinifera]	XP_002275041.1	100250197	-0.209	0.85443	0.626	0.584984
PREDICTED: NADPH-dependent pterin aldehyde reductase [Vitis vinifera]	XP_002268804.1	100267823	-0.121	0.746924	1.31	0.00460692
PREDICTED: chaperone protein dnaJ A6, chloroplastic [Vitis vinifera]	XP_002274349.1	100268135	1.78	0.166899	3.57	0.0132373
PREDICTED: uncharacterized protein LOC100262616 [Vitis vinifera]	XP_002275177.1	100262616	2.37	0.268269	1.67	0.427884
PREDICTED: 14-3-3-like protein [Vitis vinifera]	XP_002262802.1	100264912	-1.29	0.03662	-0.773	0.181209
PREDICTED: uncharacterized protein At5g48480 [Vitis vinifera]	XP_002263284.1	100251676	-0.128	0.88233	1.12	0.21175
PREDICTED: membrane steroid-binding protein 2 [Vitis vinifera]	XP_002262780.1	100253241	-1.07	0.305138	-1.11	0.291147
PREDICTED: heme-binding protein 2 [Vitis vinifera]	XP_002266519.1	100246364	-0.406	0.712071	0.243	0.824517
PREDICTED: phosphoribulokinase, chloroplastic [Vitis vinifera]	XP_002263724.1	100244092	-2	0.000647495	0.319	0.45976
PREDICTED: wound-induced basic protein [Vitis vinifera]	XP_002264634.1	100268008	4.8	0.00267941	-1.49	0.2507
PREDICTED: 40S ribosomal protein S14 [Vitis vinifera]	XP_002274381.1	100248468	-1.71	0.0409606	-3.33	0.000967443
ribosomal protein L16, partial (chloroplast) [Vitis vinifera]	BAH90783.1		1.5	0.0935863	-1.48	0.0982649
PREDICTED: probable ribose-5-phosphate isomerase 3, chloroplastic [Vitis vinifera]	XP_002278297.1	100264080	0.213	0.590019	0.259	0.513723
PREDICTED: adenylate kinase 4 isoform X1 [Vitis vinifera]	XP_002266762.1	100240759	-3.16	0.00219716	-0.442	0.584344
unnamed protein product, partial [Vitis vinifera]	CBI18797.3	100852483	-1.12	0.491132	1.06	0.517038
PREDICTED: uncharacterized protein LOC100242143 [Vitis vinifera]	XP_002263934.1	100242143	1.37	0.551667	-0.622	0.785539
PREDICTED: ankyrin repeat and SAM domain-containing protein 6 [Vitis vinifera]	XP_002267796.1	100246803	1.72	0.0734921	0.211	0.812061
PREDICTED: ran-binding protein 1 homolog a [Vitis vinifera]	XP_002262903.1	100243801	-0.568	0.558495	-0.0468	0.961231
PREDICTED: protease Do-like 1, chloroplastic [Vitis vinifera]	XP_002267510.3	100241896	-0.27	0.486314	-0.461	0.245573
PREDICTED: uncharacterized protein LOC100245159 [Vitis vinifera]	XP_002266350.1	100245159	-0.0424	0.914434	-1.22	0.00975631
PREDICTED: abscisic stress-ripening protein 2 [Vitis vinifera]	XP_002265590.2	100250281	1.22	0.111653	0.0981	0.891549
PREDICTED: proteasome subunit beta type-7-A [Vitis vinifera]	XP_002285415.1	100249199	-1.25	0.226981	1.42	0.174187
PREDICTED: vacuolar protein sorting-associated protein 20 homolog 2 [Vitis vinifera]	XP_002270590.1	100248753	0.359	0.601211	-1.79	0.022096
PREDICTED: far upstream element-binding protein 2 [Vitis vinifera]	XP_002278761.1	100259454	0.00858	0.98384	-1.38	0.00732646
PREDICTED: ran-binding protein 1 homolog a [Vitis vinifera]	XP_002280173.1	100247393	-0.281	0.624618	1.43	0.0275308
PREDICTED: uncharacterized protein LOC100249293 [Vitis vinifera]	XP_002281444.2	100249293	1.01	0.480371	1.92	0.194283
PREDICTED: selenoprotein H [Vitis vinifera]	XP_002282811.1	100261165	0.62	0.688616	-0.48	0.756087
PREDICTED: probable transcriptional regulatory protein At2g25830 isoform X1 [Vitis vinifera]	XP_002283851.1	100245721	-1.13	0.270773	0.529	0.598911
PREDICTED: photosynthetic NDH subunit of subcomplex B 3, chloroplastic [Vitis vinifera]	XP_002281853.1	100250753	-2.22	0.126532	1.71	0.227867
PREDICTED: probable histone H2A variant 3 [Vitis vinifera]	XP_002284738.1	100249276	-1.59	0.279128	-0.701	0.624627
PREDICTED: cytochrome b-c1 complex subunit 7-2 isoform X1 [Vitis vinifera]	XP_002284960.1	100257612	-1.02	0.115812	-2.72	0.000952089
PREDICTED: eukaryotic translation initiation factor 5A-2 [Vitis vinifera]	XP_002285505.1	100247352	-0.892	0.285834	3.08	0.00285308
PREDICTED: phospholipid hydroperoxide glutathione peroxidase 1, chloroplastic [Vitis vinifera]	XP_002285564.1	100245697	-0.635	0.16498	0.391	0.37826
unnamed protein product, partial [Vitis vinifera]	CBI21159.3	100252604	0.624	0.283462	-0.559	0.333777
unnamed protein product, partial [Vitis vinifera]	CBI21204.3	100256565	1.62	0.0421955	-0.35	0.62658
unnamed protein product, partial [Vitis vinifera]	CBI21275.3	100266854	-0.534	0.737841	0.104	0.948081
PREDICTED: uncharacterized protein LOC100265298 isoform X2 [Vitis vinifera]	XP_002270017.1		1.49	0.130552	1.32	0.177762
PREDICTED: mitochondrial import receptor subunit TOM20 [Vitis vinifera]	XP_002269795.1	100248125	-0.163	0.794953	-0.587	0.359771
PREDICTED: CBS domain-containing protein CBSX1, chloroplastic [Vitis vinifera]	XP_002283079.1	100257777	0.936	0.0405708	-0.901	0.0472113
PREDICTED: photosynthetic NDH subunit of lumenal location 4, chloroplastic [Vitis vinifera]	XP_002281281.1	100268058	0.177	0.647535	-0.944	0.0303722
PREDICTED: probable ATP synthase 24 kDa subunit, mitochondrial [Vitis vinifera]	XP_002279389.1	100254399	-0.177	0.645068	-0.569	0.156486
PREDICTED: uncharacterized protein LOC100262744 isoform X2 [Vitis vinifera]	XP_010645005.1	100262744	-0.478	0.58934	1.98	0.0424641
PREDICTED: photosystem II 10 kDa polypeptide, chloroplastic [Vitis vinifera]	XP_002271791.1	100243967	0.0101	0.984672	-1.23	0.0371941
PREDICTED: mitochondrial outer membrane protein porin of 34 kDa [Vitis vinifera]	XP_002282471.1	100264665	1.77	0.150562	3.65	0.00919076
PREDICTED: ATP-dependent zinc metalloprotease FTSH 6, chloroplastic [Vitis vinifera]	XP_002283393.2	100266289	-1.36	0.165755	1.93	0.0587913
PREDICTED: uncharacterized protein LOC100247999 [Vitis vinifera]	XP_002267727.1	100247999	2.62	0.0486965	-0.279	0.816826
PREDICTED: bifunctional monothiol glutaredoxin-S16, chloroplastic [Vitis vinifera]	XP_002263823.1	100245544	-0.96	0.455203	3.42	0.0193362
PREDICTED: huntingtin-interacting protein K [Vitis vinifera]	XP_002278475.1	100251666	1.38	0.460783	-2.4	0.213129
PREDICTED: universal stress protein PHOS32 isoform X1 [Vitis vinifera]	XP_002277653.1	100255026	-0.153	0.871088	1.36	0.168045
PREDICTED: major allergen Pru av 1 [Vitis vinifera]	XP_002274785.1	100246525	-1.86	0.0895875	-0.784	0.447153
PREDICTED: 60S ribosomal protein L19-2 [Vitis vinifera]	XP_002272727.1	100267158	0.924	0.34917	2.36	0.0304577
PREDICTED: probable small nuclear ribonucleoprotein F [Vitis vinifera]	XP_002272246.1	100263985	1.48	0.34975	0.885	0.56974
PREDICTED: oxygen-evolving enhancer protein 3, chloroplastic [Vitis vinifera]	XP_002275624.1	100240959	0.93	0.131609	-0.55	0.355304
unnamed protein product, partial [Vitis vinifera]	CBI23563.3		1.32	0.0282403	-1.48	0.016406
PREDICTED: multiple organellar RNA editing factor 2, chloroplastic [Vitis vinifera]	XP_002285392.1	100251024	2.46	0.172125	0.635	0.711954
unnamed protein product, partial [Vitis vinifera]	CBI23720.3	104879303	2.88	0.0232336	0.123	0.911269
PREDICTED: rhodanese-like/PpiC domain-containing protein 12, chloroplastic [Vitis vinifera]	XP_002276538.1	100244760	-1.14	0.256893	3.38	0.00485496
PREDICTED: 10 kDa chaperonin, mitochondrial [Vitis vinifera]	XP_002264840.1	100254674	-0.249	0.50488	-1.43	0.00249697
unnamed protein product, partial [Vitis vinifera]	CBI24299.3	100261522	0.243	0.57387	1.9	0.00100927
PREDICTED: cysteine proteinase inhibitor A [Vitis vinifera]	XP_003632227.1	100258165	-1.21	0.397524	-1.56	0.280768
PREDICTED: CDGSH iron-sulfur domain-containing protein NEET [Vitis vinifera]	XP_002269624.1	100263402	-2.8	0.0121261	-0.289	0.760043
PREDICTED: 40S ribosomal protein S20-2 [Vitis vinifera]	XP_002265347.1	100258347	-0.161	0.701546	-0.371	0.38632
PREDICTED: beta-fructofuranosidase, soluble isoenzyme I isoform X1 [Vitis vinifera]	XP_002265534.1	100256970	-0.799	0.111046	-0.674	0.171181
PREDICTED: 23.6 kDa heat shock protein, mitochondrial [Vitis vinifera]	XP_002267332.1	100253548	0.31	0.559437	-0.304	0.566836
PREDICTED: DNA-directed RNA polymerases II and V subunit 8A [Vitis vinifera]	XP_002274171.1	100254322	1.96	0.0349172	0.267	0.747531
unnamed protein product, partial [Vitis vinifera]	CBI24644.3		2.64	0.049348	0.973	0.430947
PREDICTED: uncharacterized protein LOC100257831 isoform X1 [Vitis vinifera]	XP_002273660.2		2.37	0.0846101	-1.15	0.375508
PREDICTED: 15 kDa selenoprotein [Vitis vinifera]	XP_002273955.1	100266214	1.98	0.214582	0.172	0.910848
PREDICTED: cysteine synthase, chloroplastic/chromoplastic [Vitis vinifera]	XP_002277485.1	100233046	0.411	0.286985	1.09	0.0135553
PREDICTED: uncharacterized protein LOC100252564 [Vitis vinifera]	XP_002277983.1	100252564	0.537	0.395708	-1.65	0.0210386
PREDICTED: aminoacyl tRNA synthase complex-interacting multifunctional protein 1 [Vitis vinifera]	XP_002280840.1	100245646	1.46	0.303284	-0.394	0.775529
PREDICTED: uncharacterized protein LOC100248935 [Vitis vinifera]	XP_002277779.1	100248935	-0.617	0.43906	0.558	0.483068
unnamed protein product, partial [Vitis vinifera]	CBI28258.3	100854423	-1.12	0.220179	1.8	0.0604553
PREDICTED: dnaJ protein homolog [Vitis vinifera]	XP_002270362.1	100251979	-0.363	0.684767	2.51	0.0154633
PREDICTED: ubiquitin-conjugating enzyme E2 variant 1D [Vitis vinifera]	XP_002271772.1	100248369	1.22	0.281923	0.216	0.844819
unnamed protein product, partial [Vitis vinifera]	CBI28434.3		0.789	0.264309	1.76	0.0244024
PREDICTED: indole-3-glycerol phosphate synthase, chloroplastic [Vitis vinifera]	XP_002265275.1	100251045	1.39	0.159431	2.53	0.0195313
PREDICTED: heterogeneous nuclear ribonucleoprotein 1 [Vitis vinifera]	XP_002267309.1	100240900	-0.644	0.751265	-1.53	0.457053
PREDICTED: GBF-interacting protein 1-like isoform X1 [Vitis vinifera]	XP_002267265.1	100245992	0.535	0.467552	-0.166	0.819499
unnamed protein product, partial [Vitis vinifera]	CBI28691.3	100263214	0.537	0.230715	-1.19	0.0179487
PREDICTED: N-alpha-acetyltransferase 20 [Vitis vinifera]	XP_002278246.1	100252851	0.058	0.977906	-1.53	0.472352
PREDICTED: 60S ribosomal protein L13-1 [Vitis vinifera]	XP_002274000.1	100257471	-0.805	0.465338	-4.58	0.00140356
PREDICTED: peptidyl-prolyl cis-trans isomerase FKBP19, chloroplastic [Vitis vinifera]	XP_002267989.1	100257384	0.84	0.159591	0.288	0.613953
PREDICTED: uncharacterized protein DDB_G0288133 [Vitis vinifera]	XP_002266051.1	100265608	0.845	0.0385922	-0.711	0.0733421
PREDICTED: 2,3-bisphosphoglycerate-independent phosphoglycerate mutase [Vitis vinifera]	XP_002266205.1	100245007	-0.666	0.547962	1.15	0.308201
PREDICTED: 14 kDa zinc-binding protein [Vitis vinifera]	XP_002270641.1	100265718	-2.34	0.271241	-1.65	0.431191
PREDICTED: V-type proton ATPase subunit G1 [Vitis vinifera]	XP_002275050.1	100251261	4.41	0.00306767	-1.01	0.398759
PREDICTED: chlorophyll a-b binding protein 6, chloroplastic [Vitis vinifera]	XP_002275552.1	100263275	0.51	0.518151	2.67	0.00541682
PREDICTED: uncharacterized protein LOC100263359 [Vitis vinifera]	XP_002278214.1	100263359	0.495	0.363318	0.0635	0.90529
PREDICTED: sedoheptulose-1,7-bisphosphatase, chloroplastic [Vitis vinifera]	XP_002263049.1	100260169	-0.565	0.165261	0.686	0.0990675
unnamed protein product, partial [Vitis vinifera]	CBI31602.3		-1.1	0.10876	1.76	0.0182692
PREDICTED: uncharacterized protein At2g39795, mitochondrial [Vitis vinifera]	XP_002282374.1	100266772	0.167	0.876495	0.897	0.411198
PREDICTED: thylakoid lumenal 15 kDa protein 1, chloroplastic [Vitis vinifera]	XP_002282933.1	100244370	0.509	0.252835	-0.896	0.0580407
PREDICTED: photosynthetic NDH subunit of lumenal location 1, chloroplastic [Vitis vinifera]	XP_002279556.1	100242691	-0.505	0.748429	0.12	0.938952
PREDICTED: psbP-like protein 1, chloroplastic [Vitis vinifera]	XP_002284256.1	100259776	0.734	0.0894307	-0.288	0.47748
unnamed protein product, partial [Vitis vinifera]	CBI32196.3		-2.37	0.0851453	-1.08	0.404149
PREDICTED: peptide chain release factor APG3, chloroplastic [Vitis vinifera]	XP_002269884.1	100247720	0.428	0.4967	1.97	0.00853368
PREDICTED: uncharacterized protein LOC100240762 [Vitis vinifera]	XP_002270167.1	100240762	1.61	0.0182489	0.685	0.2596
PREDICTED: endo-1,3;1,4-beta-D-glucanase [Vitis vinifera]	XP_002275763.1	100252738	1.74	0.198349	0.872	0.507057
PREDICTED: copper-transporting ATPase PAA1, chloroplastic [Vitis vinifera]	XP_002274497.1	100257685	0.924	0.488905	-0.547	0.679812
PREDICTED: uncharacterized protein LOC100266972 [Vitis vinifera]	XP_002268556.1	100266972	1.57	0.383116	0.237	0.893185
unnamed protein product, partial [Vitis vinifera]	CBI33169.3	100233050	-0.401	0.408727	1.61	0.00576987
PREDICTED: uncharacterized protein LOC100265785 isoform X1 [Vitis vinifera]	XP_002284553.1	100265785	1.44	0.0447209	-1.89	0.0131307
PREDICTED: glutathione S-transferase DHAR3, chloroplastic isoform X1 [Vitis vinifera]	XP_002266106.1	100258402	-0.805	0.0329408	0.941	0.0159359
PREDICTED: uncharacterized protein LOC100241624 [Vitis vinifera]	XP_002270339.2	100241624	0.211	0.816842	-0.616	0.504166
PREDICTED: 60S ribosomal protein L26-1 [Vitis vinifera]	XP_003632488.1	100855039	-2.91	0.0627783	-2.42	0.112648
PREDICTED: ubiquitin receptor RAD23c [Vitis vinifera]	XP_002283656.1	100244610	2.82	0.0208554	2.44	0.0391385
unnamed protein product, partial [Vitis vinifera]	CBI33677.3	100248029	-0.00553	0.998379	1.95	0.478237
unnamed protein product, partial [Vitis vinifera]	CBI34046.3	100245219	1.44	0.00747814	-0.268	0.55101
PREDICTED: 28 kDa ribonucleoprotein, chloroplastic [Vitis vinifera]	XP_002270233.1	100266472	1.53	0.0151812	-0.329	0.545107
unnamed protein product, partial [Vitis vinifera]	CBI34862.3	100257580	1.24	0.173846	-0.00538	0.995068
PREDICTED: protein enabled [Vitis vinifera]	XP_002275607.1	100264681	0.418	0.760919	0.267	0.845844
PREDICTED: glutaredoxin [Vitis vinifera]	XP_002276266.1	100244121	-0.586	0.2027	1.59	0.004001
PREDICTED: peptide deformylase 1B, chloroplastic [Vitis vinifera]	XP_002276964.1	100250707	2.62	0.0551621	0.283	0.819951
PREDICTED: carbonic anhydrase 2 isoform X1 [Vitis vinifera]	XP_002277957.1	100249137	-2.84	0.00615557	-0.000261	0.999755
unnamed protein product, partial [Vitis vinifera]	CBI34931.3		1.5	0.00524921	-0.509	0.260225
PREDICTED: uncharacterized protein LOC100266403 [Vitis vinifera]	XP_002274527.1	100266403	-1.3	0.303921	-2.07	0.115113
PREDICTED: peptidyl-prolyl cis-trans isomerase, chloroplastic [Vitis vinifera]	XP_002278807.1	100262894	0.424	0.268458	0.671	0.0929312
PREDICTED: uncharacterized protein LOC100264617 [Vitis vinifera]	XP_002275276.3	100264617	1.31	0.00940559	-1.36	0.00760193
PREDICTED: ferredoxin-thioredoxin reductase catalytic chain, chloroplastic [Vitis vinifera]	XP_002280653.1	100245804	0.112	0.934123	2.56	0.0816743
PREDICTED: ABC transporter I family member 6, chloroplastic [Vitis vinifera]	XP_002267203.1	100243733	-0.0887	0.837231	-0.532	0.233834
PREDICTED: thioredoxin-like protein CITRX, chloroplastic [Vitis vinifera]	XP_002264063.1	100254862	0.869	0.601795	0.0832	0.959848
PREDICTED: NADPH:quinone oxidoreductase [Vitis vinifera]	XP_002264859.1	100261719	0.107	0.928564	-0.108	0.928048
unnamed protein product, partial [Vitis vinifera]	CBI35182.3	100242733	0.263	0.482357	-0.219	0.556199
PREDICTED: probable prefoldin subunit 4 [Vitis vinifera]	XP_002264422.1	100243376	0.258	0.867635	-3.21	0.0584378
PREDICTED: pathogenesis-related protein PR-4 [Vitis vinifera]	XP_002264647.1	100260476	-1.68	0.143874	1.04	0.347356
PREDICTED: nifU-like protein 4, mitochondrial [Vitis vinifera]	XP_002264979.1	100260156	-0.345	0.616103	0.723	0.30301
PREDICTED: nascent polypeptide-associated complex subunit beta [Vitis vinifera]	XP_002265041.1	100242819	1.16	0.223874	0.0196	0.982955
PREDICTED: glycine-rich RNA-binding protein 3, mitochondrial [Vitis vinifera]	XP_002271224.1	100246039	1.18	0.172866	0.389	0.638002
PREDICTED: glycine-rich RNA-binding protein RZ1A [Vitis vinifera]	XP_003634493.1	100256416	0.471	0.626745	2.97	0.00969493
PREDICTED: succinate dehydrogenase assembly factor 2, mitochondrial isoform X1 [Vitis vinifera]	XP_010646726.1	100259710	-0.908	0.118548	0.355	0.519942
PREDICTED: acyl carrier protein 1, chloroplastic [Vitis vinifera]	XP_002267614.1	100253968	4.59	0.0241865	2.07	0.260308
PREDICTED: light-regulated protein [Vitis vinifera]	XP_002269300.1	100245467	-0.866	0.238194	0.475	0.507017
PREDICTED: UPF0603 protein At1g54780, chloroplastic [Vitis vinifera]	XP_002284939.1	100254639	-0.452	0.293321	-0.25	0.553733
PREDICTED: eukaryotic translation initiation factor 3 subunit J [Vitis vinifera]	XP_002284709.1	100242541	0.634	0.289111	-1.34	0.038514
unnamed protein product, partial [Vitis vinifera]	CBI37468.3	100254618	0.933	0.207639	-2.58	0.00376918
PREDICTED: uncharacterized protein LOC100260231 [Vitis vinifera]	XP_002262727.1	100260231	-0.162	0.9353	-1.36	0.500619
PREDICTED: NAD(P)H-quinone oxidoreductase subunit O, chloroplastic isoform X1 [Vitis vinifera]	XP_002280638.1	100248924	0.981	0.0914424	-1.19	0.0474802
PREDICTED: UTP--glucose-1-phosphate uridylyltransferase isoform X1 [Vitis vinifera]	XP_002282276.1	100253896	-3.15	0.0116092	1.07	0.320392
PREDICTED: uncharacterized protein C6C3.02c [Vitis vinifera]	XP_002269289.1	100253947	-2.66	0.00964889	-0.973	0.273111
PREDICTED: NADH dehydrogenase [ubiquinone] iron-sulfur protein 4, mitochondrial-like [Vitis vinifera]	XP_003634841.2	100852788	-1.99	0.30573	-0.309	0.870773
unnamed protein product, partial [Vitis vinifera]	CBI38682.3	104881879	-2.82	0.0872321	-2.12	0.185085
PREDICTED: GRF1-interacting factor 3 isoform X1 [Vitis vinifera]	XP_002263524.1	100262678	0.44	0.320192	0.5	0.261924
PREDICTED: 60S acidic ribosomal protein P1 [Vitis vinifera]	XP_002266284.1	100261912	3.02	0.154952	1.61	0.431341
PREDICTED: protein CURVATURE THYLAKOID 1B, chloroplastic [Vitis vinifera]	XP_002266107.1	100248815	-0.546	0.697722	0.912	0.518881
PREDICTED: 40S ribosomal protein S13 [Vitis vinifera]	XP_002280012.2		0.678	0.628179	-0.311	0.82342
PREDICTED: putative lipid-binding protein At4g00165 [Vitis vinifera]	XP_003633921.2	100259034	-0.522	0.61928	2.63	0.0267264
unnamed protein product, partial [Vitis vinifera]	CBI38896.3	100245397	-1.74	0.0854198	1.27	0.194563
PREDICTED: 50S ribosomal protein L17, chloroplastic [Vitis vinifera]	XP_002275983.1	100263106	0.745	0.215925	-1.47	0.0257237
PREDICTED: putative phosphatidylglycerol/phosphatidylinositol transfer protein DDB_G0282179 [Vitis vinifera]	XP_002271535.1	100244437	-1.5	0.159051	1.93	0.0785951
PREDICTED: 33 kDa ribonucleoprotein, chloroplastic [Vitis vinifera]	XP_002264127.1	100255531	1.35	0.383107	1.05	0.494773
PREDICTED: protein TIC 40, chloroplastic isoform X1 [Vitis vinifera]	XP_002282574.1	100265473	0.883	0.0505134	0.263	0.524742
PREDICTED: histone H2A.1 [Vitis vinifera]	XP_002283971.1	100256203	0.399	0.667628	-1.11	0.24713
PREDICTED: 40S ribosomal protein S21 [Vitis vinifera]	XP_002283649.1	100246017	0.49	0.660745	-0.624	0.577045
unnamed protein product, partial [Vitis vinifera]	CBI39531.3	100261409	0.989	0.41081	0.406	0.731777
unnamed protein product, partial [Vitis vinifera]	CBI39540.3	100259659	-2.26	0.0156181	0.0843	0.916263
PREDICTED: uncharacterized protein LOC100245914 [Vitis vinifera]	XP_002281636.1	100245914	-0.167	0.837464	0.713	0.389318
PREDICTED: chloroplast stem-loop binding protein of 41 kDa b, chloroplastic [Vitis vinifera]	XP_002281395.1	100261308	-2.54	0.0393837	-0.693	0.534313
PREDICTED: 30S ribosomal protein S10, chloroplastic [Vitis vinifera]	XP_002265045.1	100248042	-0.0462	0.982505	-1.3	0.54266
PREDICTED: LOW QUALITY PROTEIN: spidroin-1 [Vitis vinifera]	XP_010644568.1		0.0347	0.95895	0.661	0.337846
PREDICTED: fructose-bisphosphate aldolase, cytoplasmic isozyme 1 [Vitis vinifera]	XP_002263794.1	100265177	-0.226	0.599202	1.58	0.00333048
PREDICTED: prohibitin-3, mitochondrial [Vitis vinifera]	XP_002265881.1	100247395	0.0101	0.991633	0.651	0.502706
PREDICTED: 60S acidic ribosomal protein P3 [Vitis vinifera]	XP_002269613.1	100259048	-1.72	0.339743	1.13	0.524347
PREDICTED: uncharacterized protein LOC100247238 [Vitis vinifera]	XP_002271647.1	100247238	1.43	0.061146	-0.277	0.693459
PREDICTED: small ubiquitin-related modifier 1 [Vitis vinifera]	XP_002262911.1	100255142	-0.18	0.898015	1.89	0.195568
PREDICTED: peptidyl-prolyl cis-trans isomerase FKBP15-1 [Vitis vinifera]	XP_002271056.1	100245185	0.12	0.746933	0.216	0.563601
unnamed protein product [Vitis vinifera]	CBM39207.1	100249611	1.36	0.361972	-3.42	0.0364963
PREDICTED: 18.2 kDa class I heat shock protein [Vitis vinifera]	XP_002281354.1	100249533	-1.84	0.0065881	-0.949	0.109666
PREDICTED: 18.1 kDa class I heat shock protein [Vitis vinifera]	XP_002280935.1	100253085	-2.71	0.168095	0.443	0.812825
PREDICTED: 18.1 kDa class I heat shock protein [Vitis vinifera]	XP_002280353.1		-1.79	0.00375038	-0.997	0.0640569
PREDICTED: 18.2 kDa class I heat shock protein [Vitis vinifera]	XP_002281285.1	100265108	-1.88	0.288916	-0.904	0.601668
unnamed protein product [Vitis vinifera]	CBM35005.1		-0.0114	0.985118	0.785	0.215861
PREDICTED: nucleoside diphosphate kinase 2, chloroplastic isoform X2 [Vitis vinifera]	XP_002263177.1	100242823	0.0319	0.969659	2.56	0.0103821
PREDICTED: 28 kDa ribonucleoprotein, chloroplastic [Vitis vinifera]	XP_002278832.1	100257045	1.43	0.0358943	-0.0202	0.973491
PREDICTED: FKBP12-interacting protein of 37 kDa isoform X1 [Vitis vinifera]	XP_002281490.1	100246679	2.5	0.00594403	0.282	0.704647
unnamed protein product, partial [Vitis vinifera]	CBI14990.3	100253519	-0.33	0.885566	-0.171	0.940471
PREDICTED: peroxisomal membrane protein PEX14 isoform X1 [Vitis vinifera]	XP_002282743.1	100253619	-0.681	0.404667	0.368	0.648169
PREDICTED: 40S ribosomal protein S19-3 [Vitis vinifera]	XP_002284393.1	100255295	1.84	0.184631	-3.44	0.0236052
PREDICTED: uncharacterized protein LOC100250168 [Vitis vinifera]	XP_002271953.1	100250168	-2.25	0.0957918	0.211	0.86685
PREDICTED: protein SPIRAL1-like 1 [Vitis vinifera]	XP_002285501.1	100252679	0.849	0.124206	-1.48	0.0147657
PREDICTED: ribulose bisphosphate carboxylase small chain, chloroplastic [Vitis vinifera]	XP_002276967.1	100267942	-1.84	0.0109701	1.47	0.0326498
PREDICTED: 20 kDa chaperonin, chloroplastic [Vitis vinifera]	XP_002277861.1	100267892	0.136	0.753308	-0.832	0.0753168
PREDICTED: 40S ribosomal protein S7 [Vitis vinifera]	XP_002278371.1	100252536	-1.42	0.480632	0.2	0.919735
PREDICTED: adenylate kinase 4 [Vitis vinifera]	XP_002283508.1	100245612	-1.09	0.0599405	0.917	0.105597
PREDICTED: thylakoid lumenal 17.9 kDa protein, chloroplastic [Vitis vinifera]	XP_002280221.1	100262841	3.33	0.040399	-0.869	0.554729
PREDICTED: glutamate-1-semialdehyde 2,1-aminomutase, chloroplastic [Vitis vinifera]	XP_002284200.1	100250737	-3.53	0.027819	2.72	0.076771
unnamed protein product, partial [Vitis vinifera]	CBI15747.3	100250896	-0.86	0.263492	-0.502	0.505404
PREDICTED: probable alpha-mannosidase At5g13980 [Vitis vinifera]	XP_002280858.1	100249067	-3	0.0252889	-3.85	0.00703227
PREDICTED: peptidyl-prolyl cis-trans isomerase FKBP20-2, chloroplastic isoform X2 [Vitis vinifera]	XP_002274957.1	100258093	-2.6	0.181623	-2.41	0.213979
unnamed protein product, partial [Vitis vinifera]	CBI16673.3	100259885	0.914	0.263194	0.0525	0.947088
PREDICTED: tubulin-folding cofactor A [Vitis vinifera]	XP_002270593.1	100246164	1.34	0.284674	-0.0583	0.961847
PREDICTED: ATP synthase subunit delta', mitochondrial [Vitis vinifera]	XP_002267995.1	100242707	0.38	0.780344	2.4	0.0997798
PREDICTED: 10 kDa chaperonin 1, chloroplastic [Vitis vinifera]	XP_002267346.1	100252967	0.586	0.614601	2.16	0.0836361
PREDICTED: acyl carrier protein 1, mitochondrial [Vitis vinifera]	XP_002266315.1	100246253	-0.0902	0.947083	0.653	0.632541
PREDICTED: uncharacterized protein LOC100244771 [Vitis vinifera]	XP_002263772.1	100244771	0.626	0.574043	2.38	0.0512904
PREDICTED: chlorophyll a-b binding protein CP26, chloroplastic [Vitis vinifera]	XP_002264295.1	100246457	-1.51	0.0105177	0.175	0.72468
PREDICTED: uncharacterized protein LOC100253402 [Vitis vinifera]	XP_002266468.1	100253402	-2.47	0.0215353	2.29	0.0305226
PREDICTED: 50S ribosomal protein L9, chloroplastic [Vitis vinifera]	XP_002274311.1	100251697	1.92	0.125619	1.43	0.242952
unnamed protein product, partial [Vitis vinifera]	CBI17131.3	100233100	-2.69	0.000743389	-0.937	0.130268
PREDICTED: 26S proteasome non-ATPase regulatory subunit 4 homolog [Vitis vinifera]	XP_002264558.1	100257366	0.782	0.260418	2.89	0.00122485
PREDICTED: peptidyl-prolyl cis-trans isomerase Pin1 [Vitis vinifera]	XP_002269631.1	100242075	1.09	0.0751214	0.00514	0.992746
PREDICTED: cysteine protease RD19A [Vitis vinifera]	XP_002275759.1	100233020	-2.26	0.0012153	-0.134	0.799102
unnamed protein product, partial [Vitis vinifera]	CBI17497.3	100244526	-0.254	0.837466	-2.77	0.0439401
PREDICTED: membrane-associated protein VIPP1, chloroplastic isoform X1 [Vitis vinifera]	XP_002276816.1	100249595	0.787	0.0394892	-0.461	0.19707
PREDICTED: biotin carboxyl carrier protein of acetyl-CoA carboxylase, chloroplastic isoform X1 [Vitis vinifera]	XP_002276955.2	100266760	0.192	0.830944	1.43	0.131782
PREDICTED: thioredoxin F-type, chloroplastic [Vitis vinifera]	XP_002277021.2	100261565	1.37	0.348629	1.22	0.401787
PREDICTED: mitochondrial outer membrane protein porin 4 [Vitis vinifera]	XP_002272180.1	100242708	-0.506	0.543347	2.38	0.01392
PREDICTED: glutaredoxin-C4 [Vitis vinifera]	XP_002266525.1	100241059	0.89	0.229342	-1.87	0.0224469
unnamed protein product, partial [Vitis vinifera]	CBI17930.3	100242562	1.44	0.0789771	0.192	0.799934
PREDICTED: uncharacterized protein LOC100241479 [Vitis vinifera]	XP_002267558.1	100241479	1.65	0.0428073	1.64	0.0439585
PREDICTED: 40S ribosomal protein S4-1 [Vitis vinifera]	XP_002276986.1	100244922	-0.774	0.304644	-1.13	0.144741
PREDICTED: 7-dehydrocholesterol reductase isoform X2 [Vitis vinifera]	XP_002268455.2	100256426	1.59	0.108682	-1.39	0.154993
unnamed protein product, partial [Vitis vinifera]	CBI18550.3	100241011	0.502	0.687899	-0.255	0.837715
PREDICTED: electron transfer flavoprotein subunit alpha, mitochondrial [Vitis vinifera]	XP_002281637.1	100243622	-1.27	0.0807896	0.722	0.296396
PREDICTED: protein LHCP TRANSLOCATION DEFECT [Vitis vinifera]	XP_002281441.1	100260680	1.63	0.0380972	-0.383	0.587331
PREDICTED: proteasome subunit beta type-6 [Vitis vinifera]	XP_002266488.1	100262044	1.86	0.207427	1.24	0.389141
PREDICTED: phosphoglycerate kinase, chloroplastic [Vitis vinifera]	XP_002263796.1	100249576	-0.299	0.394402	0.915	0.0208953
PREDICTED: phosphoglycerate kinase, cytosolic [Vitis vinifera]	XP_002263950.1	100244419	-1.85	0.0864373	1.92	0.0765062
PREDICTED: thiosulfate/3-mercaptopyruvate sulfurtransferase 1, mitochondrial [Vitis vinifera]	XP_002264748.1	100261543	-2.21	0.120989	0.833	0.538385
PREDICTED: thioredoxin-like protein Clot [Vitis vinifera]	XP_002265835.1	100247612	2.17	0.0947751	0.198	0.869818
PREDICTED: 30S ribosomal protein 2, chloroplastic [Vitis vinifera]	XP_002265629.1	100266645	1.03	0.0235833	-0.778	0.0726327
PREDICTED: 60S ribosomal protein L6-3 [Vitis vinifera]	XP_002265394.1	100252724	0.593	0.388846	-1.47	0.0485325
PREDICTED: 50S ribosomal protein L1, chloroplastic [Vitis vinifera]	XP_002274498.1	100244868	2.03	0.000785308	1.3	0.0127714
unnamed protein product, partial [Vitis vinifera]	CBI25065.3	100253976	0.237	0.75307	0.459	0.544851
PREDICTED: cytochrome c oxidase subunit 6b-1 isoform X1 [Vitis vinifera]	XP_002282033.1	100263948	0.258	0.807311	-3.47	0.00693886
PREDICTED: glutathione S-transferase L3 [Vitis vinifera]	XP_002281575.1	100267329	-1.41	0.0748187	1.14	0.139276
PREDICTED: late embryogenesis abundant protein D-29 [Vitis vinifera]	XP_002268697.1	100252810	-2.47	0.0135181	-0.154	0.85684
PREDICTED: 50S ribosomal protein L18, chloroplastic [Vitis vinifera]	XP_002270819.1	100261418	0.896	0.115302	0.672	0.225314
PREDICTED: translationally-controlled tumor protein homolog [Vitis vinifera]	XP_002283842.1	100254426	0.166	0.727244	-0.26	0.585615
unnamed protein product, partial [Vitis vinifera]	CBI26077.3	100264903	-0.749	0.239548	-1.76	0.0143677
PREDICTED: acyl carrier protein 1, chloroplastic [Vitis vinifera]	XP_003631979.1	100242610	0.791	0.5154	0.594	0.623156
PREDICTED: photosystem II D1 precursor processing protein PSB27-H2, chloroplastic isoform X2 [Vitis vinifera]	XP_002282406.1	100259756	0.23	0.80743	0.651	0.493872
unnamed protein product, partial [Vitis vinifera]	CBI26258.3	100244156	0.716	0.454173	0.00715	0.993953
PREDICTED: photosynthetic NDH subunit of subcomplex B 5, chloroplastic [Vitis vinifera]	XP_002280020.1	100252711	1.02	0.443985	-1.21	0.366051
PREDICTED: UPF0426 protein At1g28150, chloroplastic [Vitis vinifera]	XP_002263375.1	100264935	1.67	0.174045	0.281	0.810806
PREDICTED: coiled-coil domain-containing protein 12 [Vitis vinifera]	XP_002263858.1	100244142	0.759	0.471285	0.0372	0.971414
PREDICTED: protein BOLA4, chloroplastic/mitochondrial isoform X1 [Vitis vinifera]	XP_002264335.1	100251009	1.04	0.061982	0.155	0.761065
PREDICTED: binding partner of ACD11 1 [Vitis vinifera]	XP_002274164.1	100244246	0.522	0.145029	-1.17	0.0052054
PREDICTED: polyadenylate-binding protein RBP45 [Vitis vinifera]	XP_002280601.1	100250363	3.18	0.0107964	1.59	0.149804
PREDICTED: cell division protein FtsZ homolog 1, chloroplastic [Vitis vinifera]	XP_002276623.1	100243513	1.16	0.115028	-1.09	0.13793
unnamed protein product, partial [Vitis vinifera]	CBI26711.3	100260620	0.0751	0.960521	1.32	0.394444
PREDICTED: heterogeneous nuclear ribonucleoprotein 1 [Vitis vinifera]	XP_002274589.1	100267443	2.04	0.00317674	-1.5	0.017616
PREDICTED: eukaryotic translation initiation factor 3 subunit I [Vitis vinifera]	XP_002285281.1	100250769	3.28	0.00779614	0.714	0.489543
PREDICTED: HMG-Y-related protein A [Vitis vinifera]	XP_002284720.1	100244042	0.469	0.689028	1.89	0.127531
PREDICTED: MLP-like protein 34 [Vitis vinifera]	XP_003631204.1	100853085	-1.71	0.0741543	-1.71	0.0749586
PREDICTED: 10 kDa chaperonin, mitochondrial [Vitis vinifera]	XP_002284449.1	100264459	-0.415	0.484691	-1.03	0.102119
unnamed protein product, partial [Vitis vinifera]	CBI26950.3	100267988	-1.14	0.0337036	0.506	0.302993
unnamed protein product, partial [Vitis vinifera]	CBI27021.3	100242187	-0.111	0.784476	-1.63	0.00199017
PREDICTED: alpha-xylosidase 1 [Vitis vinifera]	XP_002282429.1	100262991	0.711	0.446581	-2.86	0.00935178
PREDICTED: ubiquitin receptor RAD23c isoform X2 [Vitis vinifera]	XP_002282352.1	100245820	-0.862	0.126366	0.00717	0.989222
PREDICTED: protein decapping 5 isoform X1 [Vitis vinifera]	XP_002281060.1	100242198	-1.34	0.265568	0.875	0.45868
unnamed protein product, partial [Vitis vinifera]	CBI27134.3	100249247	1	0.489317	-0.013	0.992754
PREDICTED: photosystem II stability/assembly factor HCF136, chloroplastic [Vitis vinifera]	XP_002278958.1	100254346	-0.38	0.332772	-1.59	0.00159768
PREDICTED: uncharacterized protein LOC100249303 [Vitis vinifera]	XP_002277028.2	100249303	1.01	0.257419	1.2	0.184132
PREDICTED: glycine cleavage system H protein 2, mitochondrial [Vitis vinifera]	XP_002278252.1	100252595	-1.04	0.287406	-0.745	0.438742
PREDICTED: proteasome subunit alpha type-2-B [Vitis vinifera]	XP_002278126.1	100262851	0.247	0.667926	-0.62	0.292377
PREDICTED: peptidyl-prolyl cis-trans isomerase FKBP17-1, chloroplastic [Vitis vinifera]	XP_002276516.2	100262776	0.837	0.475519	0.0185	0.987223
PREDICTED: peptidyl-prolyl cis-trans isomerase FKBP13, chloroplastic [Vitis vinifera]	XP_002272628.1	100262788	-1.46	0.00952251	-0.00949	0.983949
PREDICTED: chaperonin 60 subunit beta 4, chloroplastic [Vitis vinifera]	XP_002269341.2	100251252	1.81	0.288354	2.06	0.231431
PREDICTED: small heat shock protein, chloroplastic [Vitis vinifera]	XP_002272065.1	100261354	-1.09	0.0154986	-0.934	0.0313108
PREDICTED: protein PLASTID TRANSCRIPTIONALLY ACTIVE 7 isoform X2 [Vitis vinifera]	XP_002266725.1	100244197	3.45	0.0193956	1.52	0.250572
PREDICTED: uncharacterized protein LOC100248862 isoform X2 [Vitis vinifera]	XP_002277728.1	100248862	2.85	0.0173484	-1.01	0.33887
PREDICTED: mitochondrial-processing peptidase subunit alpha [Vitis vinifera]	XP_002283310.1	100266273	-2.51	0.0873382	1.04	0.450152
PREDICTED: acid phosphatase 1 [Vitis vinifera]	XP_002283385.2	100250835	-0.739	0.622178	-1.96	0.206477
PREDICTED: SNW/SKI-interacting protein [Vitis vinifera]	XP_002283858.1	100245841	1.07	0.103836	0.707	0.264783
PREDICTED: uncharacterized protein LOC100245830 [Vitis vinifera]	XP_002284790.1	100245830	2.18	0.124179	-0.433	0.745826
PREDICTED: uncharacterized protein At2g34160 [Vitis vinifera]	XP_002285115.1	100268144	-0.419	0.580886	-0.739	0.33817
unnamed protein product, partial [Vitis vinifera]	CBI28195.3	100855207	3.34	0.0294324	2.04	0.153158
PREDICTED: heme oxygenase 1, chloroplastic [Vitis vinifera]	XP_002285192.1	100249078	0.0145	0.987252	-0.861	0.353718
unnamed protein product, partial [Vitis vinifera]	CBI28214.3	100261107	0.187	0.822719	1.09	0.208675
PREDICTED: thylakoid lumenal 16.5 kDa protein, chloroplastic [Vitis vinifera]	XP_002285317.1	100257780	1.23	0.00791827	-0.519	0.194174
PREDICTED: elongation factor Ts, mitochondrial [Vitis vinifera]	XP_002282316.1	100259510	-0.125	0.843328	2.02	0.00819309
PREDICTED: putative clathrin assembly protein At5g35200 [Vitis vinifera]	XP_003633084.1		3.91	0.101241	1.46	0.516267
PREDICTED: 2-methylene-furan-3-one reductase [Vitis vinifera]	XP_003631255.1	100852555	-0.811	0.0385	0.19	0.591041
PREDICTED: small ubiquitin-related modifier 1 [Vitis vinifera]	XP_002274949.1	100267064	0.216	0.855267	1.44	0.239485
PREDICTED: uncharacterized protein LOC100245899 [Vitis vinifera]	XP_002263332.1	100245899	1.75	0.105714	-1.5	0.157199
unnamed protein product, partial [Vitis vinifera]	CBI29627.3	104881029	0.322	0.818403	-0.39	0.780817
PREDICTED: cytochrome c [Vitis vinifera]	XP_002265266.1	100266092	-0.538	0.702651	1.44	0.317505
PREDICTED: photosynthetic NDH subunit of subcomplex B 2, chloroplastic [Vitis vinifera]	XP_002282103.1	100252010	-1.32	0.231779	0.323	0.762889
PREDICTED: superoxide dismutase [Cu-Zn] 2 [Vitis vinifera]	XP_002281571.1	100260705	-0.418	0.798998	-0.4	0.80743
PREDICTED: 40S ribosomal protein S5 [Vitis vinifera]	XP_002281538.1	100243591	-0.325	0.740354	-0.0854	0.930351
PREDICTED: probable plastid-lipid-associated protein 13, chloroplastic [Vitis vinifera]	XP_002279430.1	100246993	-1.26	0.00739301	-1.43	0.00348233
PREDICTED: zinc finger CCCH domain-containing protein 14 [Vitis vinifera]	XP_002279071.1	100245220	-0.457	0.60834	0.292	0.742601
PREDICTED: UBP1-associated protein 2C isoform X1 [Vitis vinifera]	XP_002278602.1	100243489	-0.113	0.834558	-0.079	0.884268
PREDICTED: H/ACA ribonucleoprotein complex subunit 3-like protein [Vitis vinifera]	XP_002266078.1	100260505	0.436	0.527765	-0.472	0.495647
PREDICTED: peptidyl-prolyl cis-trans isomerase FKBP16-4, chloroplastic isoform X3 [Vitis vinifera]	XP_002264435.1	100260611	-0.152	0.855174	-2.54	0.0104615
PREDICTED: uncharacterized protein LOC100256294 [Vitis vinifera]	XP_002283313.1	100256294	-0.894	0.594552	-1.12	0.506091
PREDICTED: 60S acidic ribosomal protein P2 [Vitis vinifera]	XP_002283025.1	100254522	2.3	0.162519	2.85	0.0911149
PREDICTED: acyl carrier protein 2, mitochondrial [Vitis vinifera]	XP_002282873.1	100242535	0.557	0.722351	-1.65	0.304892
PREDICTED: probable small nuclear ribonucleoprotein G [Vitis vinifera]	XP_002282193.1	100247783	0.306	0.522187	-1.53	0.00756204
PREDICTED: uncharacterized protein LOC100266598 [Vitis vinifera]	XP_002282019.1	100266598	-1.76	0.232255	3.15	0.0455342
PREDICTED: peptidyl-prolyl cis-trans isomerase CYP18-2 [Vitis vinifera]	XP_002281866.1	100264827	-0.0997	0.935258	0.686	0.579115
PREDICTED: 40S ribosomal protein S17 [Vitis vinifera]	XP_002281256.1	100256195	0.163	0.883445	-3.9	0.00462991
unnamed protein product, partial [Vitis vinifera]	CBI30370.3	100259748	-1.11	0.0105254	0.911	0.0281599
PREDICTED: NDR1/HIN1-like protein 12 [Vitis vinifera]	XP_002280566.1	100252904	-0.39	0.731902	-0.296	0.794246
PREDICTED: charged multivesicular body protein 5 [Vitis vinifera]	XP_002280464.1	100240918	1.94	0.0788545	-0.983	0.345759
unnamed protein product, partial [Vitis vinifera]	CBI30402.3		1.66	0.0863757	2.05	0.0402135
PREDICTED: fructose-1,6-bisphosphatase, chloroplastic [Vitis vinifera]	XP_002276567.1	100240924	-1.83	0.0206499	1.18	0.109063
PREDICTED: probable proteasome inhibitor [Vitis vinifera]	XP_002275006.1	100263076	-0.495	0.588912	-1.13	0.229159
PREDICTED: uracil phosphoribosyltransferase [Vitis vinifera]	XP_002273489.1	100261300	3.2	0.0302841	-0.927	0.484014
PREDICTED: uncharacterized protein LOC100249439 [Vitis vinifera]	XP_002269159.1	100249439	1.06	0.162626	1.34	0.0837626
unnamed protein product, partial [Vitis vinifera]	CBI30539.3	100247687	-0.153	0.679563	-0.55	0.156877
PREDICTED: mitochondrial import inner membrane translocase subunit Tim9 [Vitis vinifera]	XP_002265562.1	100261305	0.666	0.398317	-0.547	0.485253
PREDICTED: 30S ribosomal protein S5, chloroplastic [Vitis vinifera]	XP_002274092.3	100264070	1.85	0.281401	-2.08	0.22857
PREDICTED: auxin-repressed 12.5 kDa protein isoform X1 [Vitis vinifera]	XP_002279836.1	100260521	-1.54	0.0103316	-1.85	0.00355091
PREDICTED: 28 kDa heat- and acid-stable phosphoprotein [Vitis vinifera]	XP_002277729.1	100258915	-0.826	0.670359	-2.46	0.22008
PREDICTED: SH3 domain-containing protein 3 [Vitis vinifera]	XP_002272365.1	100258967	-0.417	0.548678	0.0896	0.89658
unnamed protein product, partial [Vitis vinifera]	CBI30819.3	100245196	-0.341	0.524458	0.775	0.1646
PREDICTED: 3-oxoacyl-[acyl-carrier-protein] synthase I, chloroplastic [Vitis vinifera]	XP_002272874.2	100258842	0.228	0.893895	1.79	0.308375
PREDICTED: prefoldin subunit 6 [Vitis vinifera]	XP_002269426.2	100245160	0.0585	0.952452	-2.64	0.0198512
unnamed protein product, partial [Vitis vinifera]	CBI31881.3	100250522	-0.0484	0.890893	0.0714	0.839733
PREDICTED: 23.6 kDa heat shock protein, mitochondrial [Vitis vinifera]	XP_002270632.1	100243757	-0.935	0.0496328	-1.17	0.0185828
PREDICTED: peroxisome biogenesis protein 19-2 [Vitis vinifera]	XP_002269360.1	100242021	2.34	0.053454	3.03	0.0173285
PREDICTED: protein TIC 62, chloroplastic isoform X2 [Vitis vinifera]	XP_002284662.1	100262319	2.28	0.231669	1.83	0.329706
PREDICTED: protein SLOW GREEN 1, chloroplastic [Vitis vinifera]	XP_002277967.1	100267054	-1.58	0.209478	0.956	0.435802
PREDICTED: thylakoid lumenal 15.0 kDa protein 2, chloroplastic [Vitis vinifera]	XP_002282285.1	100255100	-0.586	0.258025	-0.981	0.0721492
PREDICTED: 10 kDa chaperonin, mitochondrial [Vitis vinifera]	XP_002282838.1	100265504	1.59	0.307378	-3.87	0.0252094
PREDICTED: alpha-L-arabinofuranosidase 1 [Vitis vinifera]	XP_002283975.1	100258574	-2.53	0.0284094	-0.0248	0.98057
PREDICTED: RPM1-interacting protein 4 [Vitis vinifera]	XP_002265336.2	100258114	0.3	0.772131	0.13	0.900306
PREDICTED: chaperonin CPN60-2, mitochondrial [Vitis vinifera]	XP_002285608.1	100244356	-0.334	0.839314	3.97	0.0324764
PREDICTED: RNA-binding protein CP29B, chloroplastic [Vitis vinifera]	XP_002279685.1	100243747	3.45	0.000661969	0.207	0.779048
PREDICTED: glycine cleavage system H protein, mitochondrial [Vitis vinifera]	XP_002280707.1	100259229	-2.86	0.156911	-1.93	0.32661
PREDICTED: uncharacterized protein LOC100253981 [Vitis vinifera]	XP_002282023.1	100253981	-0.77	0.28572	-1.18	0.11501
PREDICTED: monodehydroascorbate reductase 5, mitochondrial isoform X2 [Vitis vinifera]	XP_002278648.2	100253570	0.442	0.687771	0.752	0.497334
PREDICTED: 2-C-methyl-D-erythritol 2,4-cyclodiphosphate synthase, chloroplastic isoform X1 [Vitis vinifera]	XP_002278406.1	100250076	-1.25	0.143898	-1.7	0.0565645
PREDICTED: V-type proton ATPase subunit E [Vitis vinifera]	XP_002274995.1	100246834	-1.73	0.124241	2.81	0.0213692
unnamed protein product, partial [Vitis vinifera]	CBI34488.3	100263310	-3.93	0.0226668	1.61	0.298861
PREDICTED: uncharacterized protein LOC100264984 [Vitis vinifera]	XP_002267043.1	100264984	3.71	0.00819267	0.647	0.581193
PREDICTED: 60S acidic ribosomal protein P1 [Vitis vinifera]	XP_002279082.1	100249556	1.49	0.347573	1.33	0.400247
PREDICTED: 50S ribosomal protein L11, chloroplastic [Vitis vinifera]	XP_002278388.1	100263279	-0.906	0.581996	1.6	0.339102
PREDICTED: LOW QUALITY PROTEIN: mitochondrial import inner membrane translocase subunit Tim13 [Vitis vinifera]	XP_002277915.2		0.936	0.295085	-0.664	0.451742
unnamed protein product, partial [Vitis vinifera]	CBI34639.3	100249633	0.944	0.258174	0.726	0.378478
unnamed protein product, partial [Vitis vinifera]	CBI34679.3	100259774	-0.739	0.211997	0.867	0.148532
PREDICTED: uncharacterized protein LOC100854844 [Vitis vinifera]	XP_003634833.1	100854844	-0.434	0.437539	2.46	0.000946716
PREDICTED: 17.4 kDa class III heat shock protein [Vitis vinifera]	XP_002268705.1	100244609	-1.29	0.338914	2.63	0.0680298
PREDICTED: proteasome subunit alpha type-6 [Vitis vinifera]	XP_002271929.1	100261826	-1.57	0.255281	0.051	0.969543
PREDICTED: 40S ribosomal protein S3-3 [Vitis vinifera]	XP_002275541.1	100261737	-0.699	0.375176	1.05	0.19495
PREDICTED: PHD finger protein ALFIN-LIKE 4 isoform X1 [Vitis vinifera]	XP_002276358.1	100263503	0.268	0.783026	1.43	0.161805
unnamed protein product, partial [Vitis vinifera]	CBI35908.3	100254971	0.576	0.543469	0.548	0.562924
unnamed protein product, partial [Vitis vinifera]	CBI35915.3	100251405	-0.0361	0.968381	0.475	0.604794
PREDICTED: glyoxylate/succinic semialdehyde reductase 2, chloroplastic isoform X2 [Vitis vinifera]	XP_002280297.1	100241231	4.18	0.0123496	0.789	0.58018
PREDICTED: 60S ribosomal protein L28-2 [Vitis vinifera]	XP_002281233.1	100261817	-0.266	0.841474	-0.618	0.643688
PREDICTED: vacuolar protein sorting-associated protein 32 homolog 2 [Vitis vinifera]	XP_002275998.1	100242412	-0.402	0.701392	0.224	0.830612
PREDICTED: photosynthetic NDH subunit of subcomplex B 3, chloroplastic [Vitis vinifera]	XP_002284206.1	100241139	0.695	0.561841	3.77	0.00840793
PREDICTED: photosystem I reaction center subunit VI, chloroplastic [Vitis vinifera]	XP_002284496.1	100241224	0.947	0.516864	1.3	0.376999
PREDICTED: uncharacterized protein LOC100260053 [Vitis vinifera]	XP_002284612.1	100260053	-0.281	0.738672	-3.25	0.00249559
PREDICTED: cytochrome c1-2, heme protein, mitochondrial isoform X1 [Vitis vinifera]	XP_002285312.1	100261810	-0.487	0.631299	1.35	0.198184
PREDICTED: cytochrome c oxidase subunit 5b-1, mitochondrial [Vitis vinifera]	XP_002285331.1	100251589	-0.735	0.10763	0.536	0.227161
PREDICTED: monothiol glutaredoxin-S15, mitochondrial [Vitis vinifera]	XP_002285351.1	100263408	-0.381	0.744421	2.75	0.0351219
PREDICTED: uncharacterized protein LOC100242878 [Vitis vinifera]	XP_002285378.1	100242878	1.78	0.0640961	0.551	0.536037
unnamed protein product, partial [Vitis vinifera]	CBI36290.3	100252596	1.35	0.42201	-3.36	0.0635875
unnamed protein product, partial [Vitis vinifera]	CBI36318.3	100266263	-3.4	0.00407854	0.0294	0.97527
PREDICTED: NADP-dependent glyceraldehyde-3-phosphate dehydrogenase [Vitis vinifera]	XP_002279374.1	100260378	0.775	0.466099	4.26	0.00182351
PREDICTED: leucine aminopeptidase 1 isoform X1 [Vitis vinifera]	XP_002276114.1	100250183	-0.61	0.453879	2.86	0.00420474
PREDICTED: nucleoid-associated protein At4g30620, chloroplastic [Vitis vinifera]	XP_002277907.1	100243229	1.32	0.00542152	-0.263	0.498774
PREDICTED: uncharacterized protein LOC100243384 isoform X1 [Vitis vinifera]	XP_002276984.1	100243384	1.06	0.0403047	-1.61	0.00500532
PREDICTED: peptidyl-prolyl cis-trans isomerase E [Vitis vinifera]	XP_002265598.1	100261055	-0.508	0.470469	-0.0562	0.935531
PREDICTED: probable transcription factor PosF21 [Vitis vinifera]	XP_002270784.1	100266402	-0.176	0.76381	-0.768	0.207302
unnamed protein product, partial [Vitis vinifera]	CBI36823.3	100255621	0.17	0.885118	2.58	0.0481034
PREDICTED: 60S ribosomal protein L19-2 [Vitis vinifera]	XP_002272357.1	100246855	3.1	0.0130499	-1.71	0.128522
PREDICTED: fumarate hydratase 1, mitochondrial [Vitis vinifera]	XP_002273033.1	100264013	-0.987	0.247431	1.72	0.0575187
PREDICTED: ATP-dependent Clp protease proteolytic subunit 5, chloroplastic [Vitis vinifera]	XP_002277104.1	100246849	-1.65	0.284555	-0.818	0.587084
PREDICTED: nifU-like protein 1, chloroplastic [Vitis vinifera]	XP_002278510.1	100265749	1.03	0.477873	0.343	0.810607
PREDICTED: nitrogen regulatory protein P-II homolog isoform X1 [Vitis vinifera]	XP_002279289.1	100262411	-0.263	0.497271	-1.46	0.00272907
PREDICTED: photosystem II reaction center PSB28 protein, chloroplastic [Vitis vinifera]	XP_002271666.1	100260011	0.32	0.610306	-0.626	0.327679
PREDICTED: monothiol glutaredoxin-S10 [Vitis vinifera]	XP_002267052.1	100265126	0.409	0.494715	0.303	0.611024
PREDICTED: photosystem I reaction center subunit IV B, chloroplastic [Vitis vinifera]	XP_002266424.1	100256684	1.31	0.242224	1.97	0.0915932
unnamed protein product, partial [Vitis vinifera]	CBI37272.3	100257974	-0.853	0.146175	-0.829	0.156594
PREDICTED: uncharacterized protein At4g13200, chloroplastic [Vitis vinifera]	XP_002267372.1	100247719	-0.868	0.0547585	-1.36	0.00642439
PREDICTED: cytochrome b5 [Vitis vinifera]	XP_002265677.1	100248225	0.23	0.835493	-0.744	0.505331
PREDICTED: V-type proton ATPase subunit B 2 isoform X2 [Vitis vinifera]	XP_002285897.1	100257413	-0.748	0.440953	2.76	0.0138757
PREDICTED: L-ascorbate peroxidase 3, peroxisomal [Vitis vinifera]	XP_002278281.1	100246866	-1.1	0.517715	1.27	0.457508
PREDICTED: uncharacterized protein LOC100257186 [Vitis vinifera]	XP_002276532.2		-0.594	0.51288	3.33	0.00327499
PREDICTED: ubiquitin fusion degradation protein 1 homolog isoform X1 [Vitis vinifera]	XP_002268781.1	100258971	-0.157	0.77429	0.677	0.232551
PREDICTED: NADH dehydrogenase [ubiquinone] 1 beta subcomplex subunit 9 [Vitis vinifera]	XP_002268405.1	100246984	0.258	0.825981	-3.55	0.0106406
unnamed protein product, partial [Vitis vinifera]	CBI38417.3	100250759	0.542	0.61237	2.92	0.0179138
unnamed protein product, partial [Vitis vinifera]	CBI38418.3	100250759	2.74	0.0264485	1.76	0.126542
PREDICTED: peptide methionine sulfoxide reductase A1 [Vitis vinifera]	XP_002281325.1	100258013	-1.75	0.00583162	1.49	0.0140208
unnamed protein product, partial [Vitis vinifera]	CBI38929.3	100255187	2.9	0.0105703	1.94	0.0632665
unnamed protein product, partial [Vitis vinifera]	CBI39159.3	100246361	1.24	0.5408	1.95	0.342698
PREDICTED: uncharacterized protein At3g61260 [Vitis vinifera]	XP_002270914.1	100241460	0.458	0.387287	0.368	0.484338
PREDICTED: 50S ribosomal protein L21, chloroplastic [Vitis vinifera]	XP_002272295.1	100255002	2.03	0.170287	-0.907	0.524292
PREDICTED: uncharacterized protein LOC100260183 [Vitis vinifera]	XP_002275801.1	100260183	-1.76	0.0126652	-0.789	0.206251
PREDICTED: bifunctional L-3-cyanoalanine synthase/cysteine synthase 1, mitochondrial isoform X2 [Vitis vinifera]	XP_002276013.1	100255091	0.212	0.616501	-0.464	0.283514
unnamed protein product, partial [Vitis vinifera]	CBI40498.3	100255153	-1.33	0.0281832	0.503	0.357265
unnamed protein product, partial [Vitis vinifera]	CBI40714.3	100244516	-0.0509	0.93593	1.59	0.0272956
PREDICTED: calvin cycle protein CP12-3, chloroplastic [Vitis vinifera]	XP_002276622.1	100251226	-1.48	0.00744403	-1.53	0.00604854
unnamed protein product, partial [Vitis vinifera]	CBI15787.3	104879510	1.91	0.00124884	-0.223	0.619356
unnamed protein product, partial [Vitis vinifera]	CBI15803.3	100246786	-0.14	0.869358	2.42	0.0148806
PREDICTED: peptidyl-prolyl cis-trans isomerase CYP20-1 [Vitis vinifera]	XP_002277763.1	100251977	0.0894	0.937834	0.437	0.703971
PREDICTED: uncharacterized protein LOC100265554 [Vitis vinifera]	XP_002280087.1	100265554	1.37	0.0149147	-0.604	0.227874
unnamed protein product, partial [Vitis vinifera]	CBI16028.3	100854199	-0.567	0.355986	-1.45	0.03239
PREDICTED: transcription initiation factor IIA subunit 1 [Vitis vinifera]	XP_002282322.1	100241598	1.42	0.255787	-0.279	0.817389
PREDICTED: ribulose bisphosphate carboxylase/oxygenase activase, chloroplastic isoform X1 [Vitis vinifera]	XP_002282236.1	100263871	0.00716	0.985797	1.38	0.00522652
PREDICTED: mitochondrial import inner membrane translocase subunit Tim9 [Vitis vinifera]	XP_002283877.1	100244947	0.554	0.272998	-1.5	0.00999247
PREDICTED: THO complex subunit 4A [Vitis vinifera]	XP_002284215.1	100257081	0.477	0.406193	-2.22	0.00225068
PREDICTED: probable pyridoxal 5'-phosphate synthase subunit PDX2 [Vitis vinifera]	XP_002285095.1	100267348	0.0925	0.865257	2.11	0.00247486
PREDICTED: protein disulfide isomerase-like 1-4 isoform X1 [Vitis vinifera]	XP_002285136.1	100246809	-1.03	0.108647	1.69	0.015821
PREDICTED: protein YLS3 [Vitis vinifera]	XP_002285691.1	100267331	-2.78	0.034942	-1.4	0.247632
unnamed protein product, partial [Vitis vinifera]	CBI16555.3	100241562	2.97	0.0798264	0.51	0.74561
unnamed protein product, partial [Vitis vinifera]	CBI23809.3	100244682	0.86	0.136932	0.859	0.13754
PREDICTED: probable plastid-lipid-associated protein 4, chloroplastic isoform X2 [Vitis vinifera]	XP_002275707.1	100258274	-0.634	0.63707	0.394	0.768579
PREDICTED: glutamyl-tRNA reductase-binding protein, chloroplastic [Vitis vinifera]	XP_002274572.1	100260424	1.29	0.156125	1.02	0.256745
PREDICTED: sec-independent protein translocase protein TATA, chloroplastic [Vitis vinifera]	XP_002279607.1	100250385	2.52	0.108994	0.767	0.605052
PREDICTED: GDP-mannose 3,5-epimerase 2 isoform X2 [Vitis vinifera]	XP_003631999.1	100245900	0.601	0.494796	0.0383	0.964874
PREDICTED: acyl carrier protein 1, chloroplastic [Vitis vinifera]	XP_002269176.1	100257302	-2.86	0.118761	-0.218	0.899561
PREDICTED: nascent polypeptide-associated complex subunit alpha-like protein 1 [Vitis vinifera]	XP_002266597.1	100245825	0.897	0.0239743	-1.09	0.00894656
PREDICTED: UBX domain-containing protein 4 [Vitis vinifera]	XP_002273725.1	100248761	0.632	0.582243	2.7	0.0350912
PREDICTED: glycine-rich RNA-binding protein 4, mitochondrial [Vitis vinifera]	XP_002264895.1	100247038	0.598	0.33484	-1.89	0.00907424
unnamed protein product, partial [Vitis vinifera]	CBI17306.3		-0.121	0.943141	-3.66	0.0497841
PREDICTED: uncharacterized protein LOC100247161 isoform X1 [Vitis vinifera]	XP_002285932.1	100247161	1.35	0.305313	0.505	0.694762
PREDICTED: uncharacterized protein LOC100260869 [Vitis vinifera]	XP_002285906.2		-1.35	0.00920588	0.519	0.246764
PREDICTED: plastocyanin [Vitis vinifera]	XP_002285904.1	100248911	0.0213	0.971924	-0.145	0.811418
PREDICTED: NAD(P)H-quinone oxidoreductase subunit M, chloroplastic [Vitis vinifera]	XP_002285884.1	100264425	1.06	0.0600359	0.184	0.721148
PREDICTED: uncharacterized protein LOC100260874 [Vitis vinifera]	XP_002285869.2	100260874	4.24	0.0151172	-0.538	0.719077
PREDICTED: protein disulfide-isomerase [Vitis vinifera]	XP_002285864.1	100259138	0.0692	0.860991	1.43	0.00388038
PREDICTED: photosystem II 22 kDa protein, chloroplastic [Vitis vinifera]	XP_002285857.1	100245393	-2.77	0.00566302	-1.07	0.207225
PREDICTED: uncharacterized protein LOC100247142 [Vitis vinifera]	XP_002284450.1	100247142	1.46	0.152543	-1.18	0.236567
PREDICTED: uncharacterized protein LOC100260744 [Vitis vinifera]	XP_002285824.1	100260744	0.64	0.212062	-1	0.0634747
unnamed protein product, partial [Vitis vinifera]	CBI19114.3	100248897	1.05	0.122225	0.715	0.277144
PREDICTED: uncharacterized protein LOC100260886 isoform X2 [Vitis vinifera]	XP_002285796.1	100260886	-0.704	0.397054	-1.43	0.10272
PREDICTED: 14-3-3 protein 7 isoform X1 [Vitis vinifera]	XP_002285787.1	100247183	-1.97	0.0118225	-0.529	0.430978
unnamed protein product, partial [Vitis vinifera]	CBI19195.3	100257548	0.726	0.576899	0.295	0.819298
unnamed protein product, partial [Vitis vinifera]	CBI19198.3	104882489	0.59	0.21364	2	0.00104161
PREDICTED: aspartyl protease AED3 [Vitis vinifera]	XP_002283889.2	100252287	-1.88	0.0383729	0.943	0.261132
unnamed protein product, partial [Vitis vinifera]	CBI19322.3		0.712	0.200761	0.212	0.692428
PREDICTED: low-temperature-induced cysteine proteinase [Vitis vinifera]	XP_002284973.1	100241957	-3.81	0.0385283	-2.07	0.224954
PREDICTED: polyadenylate-binding protein 8 [Vitis vinifera]	XP_002284923.1	100255846	1.74	0.0408669	2.06	0.0194159
PREDICTED: thioredoxin-like 4, chloroplastic isoform X1 [Vitis vinifera]	XP_002284743.1	100267745	-2.31	0.00807292	0.199	0.783486
PREDICTED: succinate dehydrogenase subunit 5, mitochondrial [Vitis vinifera]	XP_002284591.1	100253931	0.341	0.649437	0.562	0.457614
PREDICTED: 26S proteasome non-ATPase regulatory subunit 14 homolog [Vitis vinifera]	XP_002284566.1	100247098	-2.73	0.0141181	0.226	0.811614
PREDICTED: outer envelope pore protein 24B, chloroplastic [Vitis vinifera]	XP_002282908.1	100259086	0.183	0.785891	-0.998	0.15764
unnamed protein product, partial [Vitis vinifera]	CBI19702.3	100242088	-0.273	0.869574	1.88	0.272952
PREDICTED: protein disulfide-isomerase LQY1, chloroplastic [Vitis vinifera]	XP_002276528.2	100267764	1.65	0.164633	1.8	0.133797
PREDICTED: psbP domain-containing protein 4, chloroplastic isoform X1 [Vitis vinifera]	XP_002265695.1	100252244	-0.913	0.0433547	-1.39	0.00546608
PREDICTED: pathogen-related protein [Vitis vinifera]	XP_002263092.1	100248978	-2.57	0.000959328	0.101	0.86142
PREDICTED: peptide methionine sulfoxide reductase B1, chloroplastic [Vitis vinifera]	XP_002285647.1	100267520	0.838	0.460554	1.8	0.128933
PREDICTED: multiple organellar RNA editing factor 8, chloroplastic/mitochondrial [Vitis vinifera]	XP_002285388.1	100265808	-0.678	0.41117	0.306	0.706626
PREDICTED: malate dehydrogenase, mitochondrial [Vitis vinifera]	XP_002285356.1	100253724	-2.38	0.00407697	1.55	0.0370389
PREDICTED: 30S ribosomal protein S20, chloroplastic [Vitis vinifera]	XP_002285149.1	100265925	1.13	0.0160858	-1.11	0.0181496
PREDICTED: probable bifunctional methylthioribulose-1-phosphate dehydratase/enolase-phosphatase E1 1 [Vitis vinifera]	XP_002285049.1	100257258	-1.72	0.0140854	0.0298	0.960161
PREDICTED: peptidyl-prolyl cis-trans isomerase CYP37, chloroplastic [Vitis vinifera]	XP_002284643.3	100258986	0.559	0.240567	0.998	0.0494732
PREDICTED: cytochrome b6-f complex iron-sulfur subunit 1, chloroplastic [Vitis vinifera]	XP_002284361.1	100258879	0.123	0.807322	-0.336	0.510919
PREDICTED: NAD(P)H dehydrogenase (quinone) FQR1 [Vitis vinifera]	XP_002283286.1	100232919	-1.3	0.15355	-3.14	0.0038343
PREDICTED: probable histone H2A.2 [Vitis vinifera]	XP_002282795.1	100265822	-0.216	0.871411	-0.329	0.805364
PREDICTED: photosynthetic NDH subunit of lumenal location 3, chloroplastic [Vitis vinifera]	XP_002282744.1	100253736	0.635	0.465846	-0.692	0.428173
PREDICTED: uncharacterized protein LOC100258940 [Vitis vinifera]	XP_002279843.2	100258940	1.1	0.242811	1.15	0.223647
unnamed protein product, partial [Vitis vinifera]	CBI21871.3	100254110	0.0404	0.94524	0.267	0.650983
PREDICTED: multiprotein-bridging factor 1a [Vitis vinifera]	XP_002280992.1	100245498	-0.148	0.817612	-1.23	0.0776196
PREDICTED: oxygen-evolving enhancer protein 2, chloroplastic isoform X1 [Vitis vinifera]	XP_002283048.1	100262649	0.241	0.680505	0.0737	0.899313
PREDICTED: uncharacterized protein LOC100260370 [Vitis vinifera]	XP_002267522.1	100260370	1.73	0.106548	0.85	0.405073
PREDICTED: protein SGT1 homolog isoform X2 [Vitis vinifera]	XP_002276170.1	100244083	-1.34	0.268669	1.82	0.143197
PREDICTED: probable NADH dehydrogenase [ubiquinone] 1 alpha subcomplex subunit 5, mitochondrial [Vitis vinifera]	XP_002276087.1	100249252	0.937	0.0390858	1.77	0.00112851
PREDICTED: sec-independent protein translocase protein TATB, chloroplastic isoform X1 [Vitis vinifera]	XP_002270827.1	100254207	2.82	0.0537753	-0.487	0.714244
PREDICTED: 60S ribosomal protein L36-3 [Vitis vinifera]	XP_002268754.1	100262717	0.419	0.751977	-1.1	0.412842
PREDICTED: remorin [Vitis vinifera]	XP_002267609.1	100260907	1.36	0.0529312	0.345	0.591401
PREDICTED: thylakoid lumenal 17.4 kDa protein, chloroplastic [Vitis vinifera]	XP_002275994.2	100267488	-0.51	0.249879	0.376	0.388651
PREDICTED: rhodanese-like domain-containing protein 14, chloroplastic [Vitis vinifera]	XP_002274646.1	100245212	-0.834	0.325077	0.107	0.897226
PREDICTED: serine/arginine-rich splicing factor SR34A-like [Vitis vinifera]	XP_003634148.2		2.56	0.00721426	0.478	0.54618
PREDICTED: ribosome-binding factor PSRP1, chloroplastic [Vitis vinifera]	XP_003634154.1	100853929	1.18	0.0973767	0.0155	0.981251
PREDICTED: uncharacterized protein LOC100265804 [Vitis vinifera]	XP_002264511.1	100265804	0.707	0.598539	-2.81	0.0554493
PREDICTED: cyanate hydratase [Vitis vinifera]	XP_002285393.1	100245884	0.392	0.341756	-0.119	0.768809
PREDICTED: glutamyl-tRNA(Gln) amidotransferase subunit C, chloroplastic/mitochondrial-like [Vitis vinifera]	XP_002275650.1	100249085	1.54	0.113486	-0.612	0.5068
PREDICTED: 50S ribosomal protein L15, chloroplastic [Vitis vinifera]	XP_002279311.2	100268043	-0.533	0.498251	1.31	0.114299
PREDICTED: thioredoxin O2, mitochondrial-like isoform X1 [Vitis vinifera]	XP_003631244.1	100855130	-0.562	0.560697	-0.821	0.400042
PREDICTED: uncharacterized protein At1g32220, chloroplastic isoform X1 [Vitis vinifera]	XP_002278389.2	100247104	-2.1	0.00932422	0.302	0.656659
PREDICTED: coiled-coil domain-containing protein 124 [Vitis vinifera]	XP_002279494.2	100265934	-1.13	0.199408	-0.526	0.536639
PREDICTED: ubiquitin domain-containing protein DSK2b isoform X2 [Vitis vinifera]	XP_002282473.2	100267604	0.634	0.665983	-1.46	0.329735
PREDICTED: protein XAP5 CIRCADIAN TIMEKEEPER isoform X2 [Vitis vinifera]	XP_002275138.2	100255509	0.443	0.758659	-2.59	0.093711
PREDICTED: glycine-rich RNA-binding protein GRP2A [Vitis vinifera]	XP_003631658.1	100853676	0.327	0.35936	-1.24	0.00435376
PREDICTED: malate dehydrogenase, glyoxysomal [Vitis vinifera]	XP_003631692.1	100232924	-1.07	0.236431	1.03	0.255006
PREDICTED: 17.3 kDa class II heat shock protein [Vitis vinifera]	XP_003631809.1	100854120	-0.335	0.775356	0.641	0.586608
PREDICTED: serine/arginine-rich splicing factor RSZ22 isoform X2 [Vitis vinifera]	XP_002272657.2	100262399	1.6	0.457314	3	0.178105
PREDICTED: acyl carrier protein 2, mitochondrial [Vitis vinifera]	XP_003631882.1	100854213	0.912	0.304245	-0.989	0.267758
PREDICTED: uncharacterized protein LOC100852500 [Vitis vinifera]	XP_003631963.1	100852500	-0.000685	0.999304	-1.62	0.0605736
PREDICTED: uncharacterized protein At4g15545 isoform X1 [Vitis vinifera]	XP_002278619.2	100252741	0.355	0.388509	-0.141	0.728373
PREDICTED: peptidyl-prolyl cis-trans isomerase FKBP16-3, chloroplastic [Vitis vinifera]	XP_002274062.2	100259438	0.0736	0.842774	-0.532	0.171348
PREDICTED: peroxidase A2 [Vitis vinifera]	XP_002285652.2	100260291	-3.63	0.00198888	-0.45	0.621566
PREDICTED: ribulose bisphosphate carboxylase/oxygenase activase, chloroplastic isoform X2 [Vitis vinifera]	XP_003632187.1	100263871	-1.56	0.545391	0.471	0.853778
PREDICTED: lactoylglutathione lyase isoform X2 [Vitis vinifera]	XP_003632261.1	100244888	-1.85	0.00551093	1.32	0.0315667
PREDICTED: ruBisCO large subunit-binding protein subunit alpha [Vitis vinifera]	XP_002277357.2	100253324	0.202	0.600599	1.13	0.0128287
PREDICTED: 40S ribosomal protein S18 isoform X2 [Vitis vinifera]	XP_003632303.1	100855135	-0.0364	0.959225	-2.71	0.00278718
PREDICTED: peptidyl-prolyl cis-trans isomerase [Vitis vinifera]	XP_002273421.2	100250386	2.12	0.0340532	3.42	0.00261923
PREDICTED: mitochondrial outer membrane protein porin 2 [Vitis vinifera]	XP_002279650.2	100266220	-0.11	0.826996	0.755	0.152534
PREDICTED: arginine biosynthesis bifunctional protein ArgJ, chloroplastic-like [Vitis vinifera]	XP_002274213.2	100253362	1.93	0.0276676	0.57	0.466707
PREDICTED: signal recognition particle 54 kDa protein, chloroplastic [Vitis vinifera]	XP_002276439.2	100247624	1.14	0.300184	1.21	0.269965
PREDICTED: ubiquitin-conjugating enzyme E2 variant 1D isoform X1 [Vitis vinifera]	XP_003632650.1	100244148	0.642	0.302164	1.22	0.06502
PREDICTED: ribulose bisphosphate carboxylase/oxygenase activase, chloroplastic [Vitis vinifera]	XP_002270571.2	100256315	0.137	0.788202	2.27	0.00096023
PREDICTED: uncharacterized protein LOC100249806 [Vitis vinifera]	XP_002268800.2	100249806	-1.26	0.18305	2.08	0.0395582
PREDICTED: ACT domain-containing protein ACR11 [Vitis vinifera]	XP_003632910.1	100853428	0.799	0.0778074	-0.381	0.372281
PREDICTED: dihydrolipoyllysine-residue succinyltransferase component of 2-oxoglutarate dehydrogenase complex 1, mitochondrial [Vitis vinifera]	XP_002266593.2	100244395	-0.403	0.632578	-0.185	0.825218
PREDICTED: 14-3-3-like protein D isoform X2 [Vitis vinifera]	XP_002273375.2	100244643	0.364	0.606407	-0.0906	0.897383
PREDICTED: chlorophyll a-b binding protein of LHCII type 1 [Vitis vinifera]	XP_003633024.1	100252004	-0.347	0.340116	0.5	0.17958
PREDICTED: protein PLASTID TRANSCRIPTIONALLY ACTIVE 12 isoform X2 [Vitis vinifera]	XP_002272288.2	100251522	2.77	0.00251141	-1.85	0.0238544
PREDICTED: probable lactoylglutathione lyase, chloroplastic [Vitis vinifera]	XP_003633121.1	100252461	-0.455	0.512381	1.92	0.0161805
PREDICTED: prefoldin subunit 1 isoform X1 [Vitis vinifera]	XP_002264879.2	100260485	0.528	0.752953	0.00581	0.997233
PREDICTED: universal stress protein PHOS32 [Vitis vinifera]	XP_003633322.1	100263170	-1.51	0.230958	1.98	0.124977
PREDICTED: uncharacterized protein LOC100241703 [Vitis vinifera]	XP_002265916.2	100241703	0.732	0.570149	-0.242	0.850108
PREDICTED: 50S ribosomal protein L29, chloroplastic [Vitis vinifera]	XP_003633349.1	100248255	1.4	0.00364188	-0.968	0.0264741
PREDICTED: survival of motor neuron-related-splicing factor 30 [Vitis vinifera]	XP_002269518.2	100257533	3.23	0.0210265	0.558	0.648232
PREDICTED: biotin carboxyl carrier protein of acetyl-CoA carboxylase 2, chloroplastic [Vitis vinifera]	XP_002278151.2	100258686	0.298	0.832294	1.22	0.393704
PREDICTED: protein BTR1 isoform X2 [Vitis vinifera]	XP_002264331.2	100258231	1.34	0.179147	0.973	0.317756
PREDICTED: ACT domain-containing protein ACR12 isoform X2 [Vitis vinifera]	XP_002268975.2	100256240	-2.74	0.0955321	0.653	0.670732
PREDICTED: cysteine synthase [Vitis vinifera]	XP_003633658.1	100264196	-1.03	0.250105	3.3	0.00273817
PREDICTED: elongation factor Tu, chloroplastic-like [Vitis vinifera]	XP_003633810.1	100245586	0.269	0.766661	3.22	0.00427326
PREDICTED: protease Do-like 8, chloroplastic isoform X1 [Vitis vinifera]	XP_002278099.2	100249197	0.678	0.514219	0.936	0.372626
PREDICTED: UMP-CMP kinase 3 [Vitis vinifera]	XP_003633878.1	100241478	-0.906	0.43154	1.26	0.282101
PREDICTED: reticulon-like protein B1 [Vitis vinifera]	XP_003633965.1	100241363	-0.297	0.734677	-0.376	0.668017
PREDICTED: ATP-dependent Clp protease ATP-binding subunit CLPT1, chloroplastic isoform X1 [Vitis vinifera]	XP_002268037.2	100261804	0.537	0.155882	-0.831	0.0385119
PREDICTED: transketolase, chloroplastic [Vitis vinifera]	XP_002266494.2	100248004	-3.45	0.00121135	1.3	0.127163
PREDICTED: luminal-binding protein 5 isoform X2 [Vitis vinifera]	XP_002276268.2	100253826	0.0741	0.908466	2.51	0.00237831
PREDICTED: RNA-binding protein 1 isoform X2 [Vitis vinifera]	XP_002275189.2	100265772	0.599	0.686774	1.7	0.264829
PREDICTED: histone H1 [Vitis vinifera]	XP_003634203.1		3.09	0.0946955	-0.264	0.877983
PREDICTED: glyceraldehyde-3-phosphate dehydrogenase, cytosolic [Vitis vinifera]	XP_002263145.2	100233024	-1.09	0.0387271	0.468	0.332124
PREDICTED: eukaryotic translation initiation factor 5A-2 [Vitis vinifera]	XP_003634303.1	100852874	0.574	0.203326	1.8	0.00156988
PREDICTED: ubiquitin-40S ribosomal protein S27a [Vitis vinifera]	XP_003634320.1	100259511	0.373	0.563322	0.911	0.174989
PREDICTED: uncharacterized protein LOC100254082 [Vitis vinifera]	XP_002284740.2	100254082	1.18	0.472697	-2.2	0.195401
PREDICTED: ferredoxin--NADP reductase, leaf-type isozyme, chloroplastic [Vitis vinifera]	XP_002274366.2	100252241	2.01	0.107092	1.32	0.274024
PREDICTED: uncharacterized protein LOC100267814 [Vitis vinifera]	XP_002285876.2	100267814	-0.51	0.308041	-0.798	0.123733
PREDICTED: sm-like protein LSM3B [Vitis vinifera]	XP_002266320.2	100253870	1.03	0.119142	-2.44	0.00222185
PREDICTED: uncharacterized protein LOC100245250 [Vitis vinifera]	XP_002282265.2	100245250	0.636	0.326617	1.7	0.0199575
PREDICTED: uncharacterized protein LOC100252150 isoform X2 [Vitis vinifera]	XP_002277588.2	100252150	0.0378	0.938116	-0.952	0.0721173
PREDICTED: far upstream element-binding protein 1 isoform X2 [Vitis vinifera]	XP_002277528.2	100253453	-0.385	0.444715	-0.268	0.59203
PREDICTED: uncharacterized protein LOC100248314 [Vitis vinifera]	XP_003634942.1	100248314	0.122	0.897533	-1.13	0.249265
PREDICTED: photosystem I reaction center subunit III, chloroplastic [Vitis vinifera]	XP_003634953.1	100247987	-1.36	0.108723	-0.821	0.312965
PREDICTED: phosphoglycolate phosphatase 2 isoform X2 [Vitis vinifera]	XP_003635038.1	100243036	2.31	0.0837282	3.28	0.0210228
PREDICTED: thioredoxin-like protein HCF164, chloroplastic [Vitis vinifera]	XP_003635085.1	100257490	-1.4	0.277063	-0.236	0.850478
PREDICTED: PLAT domain-containing protein 3-like [Vitis vinifera]	XP_003635219.1	100854560	2.15	0.135566	2.39	0.101395
PREDICTED: elongation factor G-2, chloroplastic [Vitis vinifera]	XP_002264221.2	100257414	-0.441	0.653036	1.17	0.246738
PREDICTED: haloacid dehalogenase-like hydrolase domain-containing protein At4g39970 [Vitis vinifera]	XP_003635299.1	100853189	-0.681	0.593779	3.67	0.0135698
PREDICTED: heat shock 70 kDa protein, mitochondrial [Vitis vinifera]	XP_002272173.2	100248447	-0.753	0.285475	1.97	0.0142739
PREDICTED: 50S ribosomal protein L19-2, chloroplastic [Vitis vinifera]	XP_002264869.2	100263826	0.931	0.412473	-1.11	0.332476
PREDICTED: peptidyl-prolyl cis-trans isomerase FKBP62 [Vitis vinifera]	XP_002263566.2	100266654	-0.964	0.34174	4.17	0.00143544
PREDICTED: photosynthetic NDH subunit of subcomplex B 4, chloroplastic-like [Vitis vinifera]	XP_003635595.1	100854601	0.594	0.691007	1.12	0.456587
PREDICTED: thiamine thiazole synthase 1, chloroplastic [Vitis vinifera]	XP_002281769.1	100260728	2.18	0.146173	2.05	0.168945
PREDICTED: photosystem I reaction center subunit N, chloroplastic [Vitis vinifera]	XP_003631913.1	100232935	0.468	0.818389	3.35	0.12237
PREDICTED: thioredoxin reductase NTRB [Vitis vinifera]	XP_002263864.2	100263578	-1.85	0.105389	1.05	0.335087
ribulose-1,5-bisphosphate carboxylase/oxygenase large subunit, partial (chloroplast) [Vitis vinifera]	CAG25748.1		-1.52	0.0253066	1.59	0.0206022
PREDICTED: 20 kDa chaperonin, chloroplastic [Vitis vinifera]	XP_002276749.1	100232962	0.276	0.585573	-0.273	0.588884
metacaspase-5-like [Vitis vinifera]	NP_001268027.1	100241522	-0.402	0.566729	1.91	0.0179113
PREDICTED: LOW QUALITY PROTEIN: polyphenol oxidase, chloroplastic [Vitis vinifera]	XP_010647100.1	100256583	-0.198	0.604071	-1.4	0.00337436
type II peroxiredoxin F [Vitis vinifera]	NP_001268077.1	100245908	-0.687	0.100259	-0.147	0.70789
PREDICTED: catalase isozyme 1 [Vitis vinifera]	XP_003631925.1	100853165	-3.77	0.00189524	0.529	0.574232
14-3-3 protein [Vitis vinifera]	NP_001267852.1	100257548	-1.51	0.0358434	0.385	0.55284
PREDICTED: thioredoxin H-type [Vitis vinifera]	XP_002280947.1	100266040	-0.407	0.576062	0.921	0.219472
germin-like protein 2 precursor [Vitis vinifera]	NP_001267914.1	100232998	0.672	0.271242	-1.3	0.0472266
glutamine synthetase cytosolic isozyme 1 [Vitis vinifera]	NP_001268175.1	100266191	-1.17	0.0893716	0.606	0.354873
type II peroxiredoxin C [Vitis vinifera]	NP_001268191.1	100243939	0.102	0.947178	2.74	0.0971604
type II peroxiredoxin E [Vitis vinifera]	NP_001268192.1	100264932	0.199	0.543016	1.05	0.00746146
peroxiredoxin Q [Vitis vinifera]	NP_001267969.1	100250698	-0.784	0.0869823	0.717	0.113566
uncharacterized protein LOC100243029 [Vitis vinifera]	NP_001267985.1	100243029	-1.57	0.26392	0.918	0.503663
PREDICTED: protein P21 [Vitis vinifera]	XP_002282988.1	100242737	-1.79	0.00522356	0.877	0.114063
PREDICTED: uncharacterized protein LOC100249262 [Vitis vinifera]	XP_002282754.1	100249262	-0.0682	0.934796	-1.62	0.0740464
PREDICTED: MLP-like protein 28 isoform X2 [Vitis vinifera]	XP_002284578.2	100262819	-1.64	0.0121624	-1.66	0.0112673
PREDICTED: chaperone protein dnaJ 10 [Vitis vinifera]	XP_010645323.1	100267597	-2.95	0.0788717	1.65	0.300728
PREDICTED: ankyrin repeat domain-containing protein 2B isoform X1 [Vitis vinifera]	XP_010645415.1	100258947	3.69	0.0479416	-2.12	0.226184
PREDICTED: ankyrin repeat domain-containing protein 2B isoform X2 [Vitis vinifera]	XP_010645426.1	100258947	0.771	0.201701	0.605	0.308848
PREDICTED: uncharacterized protein LOC100266115 isoform X1 [Vitis vinifera]	XP_002267434.3	100266115	1.18	0.625594	0.122	0.959627
PREDICTED: chloroplast processing peptidase [Vitis vinifera]	XP_002284378.2	100252527	-0.551	0.699625	0.959	0.505245
PREDICTED: uncharacterized protein LOC100259089 [Vitis vinifera]	XP_002266585.2	100259089	1	0.490983	1.55	0.294678
PREDICTED: 60S ribosomal protein L9 [Vitis vinifera]	XP_002268859.2		-1.61	0.18595	1.75	0.152404
PREDICTED: peptidyl-prolyl cis-trans isomerase CYP26-2, chloroplastic [Vitis vinifera]	XP_002273001.2		-0.283	0.805117	1.86	0.125778
PREDICTED: peptidyl-prolyl cis-trans isomerase FKBP18, chloroplastic isoform X1 [Vitis vinifera]	XP_002273060.3	100254701	0.00738	0.990075	-0.68	0.266748
PREDICTED: MFP1 attachment factor 1-like [Vitis vinifera]	XP_002285058.3		0.611	0.710044	1.08	0.512613
PREDICTED: TOM1-like protein 2 [Vitis vinifera]	XP_010644085.1	100264036	-1.12	0.152075	1.86	0.0280595
PREDICTED: ubiquitin-conjugating enzyme E2 36 [Vitis vinifera]	XP_010644126.1	100255523	-0.00668	0.989621	-0.375	0.471099
PREDICTED: UBP1-associated protein 2C [Vitis vinifera]	XP_010644134.1	100248626	-1.41	0.0244799	0.338	0.540087
PREDICTED: multiple organellar RNA editing factor 9, chloroplastic [Vitis vinifera]	XP_010644312.1	100255654	1.47	0.267719	3.88	0.0108647
PREDICTED: 50S ribosomal protein L24, chloroplastic [Vitis vinifera]	XP_010644320.1	100250357	2.25	0.00772808	-0.677	0.344966
PREDICTED: chloroplastic lipocalin [Vitis vinifera]	XP_010644414.1	100250424	-1.35	0.0158218	-0.704	0.161534
PREDICTED: protein CWC15 homolog isoform X2 [Vitis vinifera]	XP_010644622.1		1.32	0.187729	1.04	0.294282
PREDICTED: peroxisomal (S)-2-hydroxy-acid oxidase GLO1 isoform X2 [Vitis vinifera]	XP_010644817.1	100244701	-2.29	0.00480534	-2.01	0.010243
PREDICTED: plasma membrane-associated cation-binding protein 1 [Vitis vinifera]	XP_010645166.1		-1.08	0.364167	0.23	0.843424
PREDICTED: putative quinone-oxidoreductase homolog, chloroplastic [Vitis vinifera]	XP_002267533.3	100248513	-0.0889	0.941087	3.56	0.0121409
PREDICTED: UBA and UBX domain-containing protein At4g15410 isoform X2 [Vitis vinifera]	XP_010645353.1		-2.31	0.000843656	-0.535	0.307864
PREDICTED: calmodulin [Vitis vinifera]	XP_010645766.1	100260795	-0.278	0.662517	-2.2	0.00489969
PREDICTED: uncharacterized protein LOC100242437 [Vitis vinifera]	XP_002265462.3		1.29	0.233697	-0.377	0.718469
PREDICTED: serine hydroxymethyltransferase, mitochondrial [Vitis vinifera]	XP_010646402.1	100243424	-4.25	0.00171924	2.34	0.0427396
PREDICTED: eukaryotic translation initiation factor 5A-like [Vitis vinifera]	XP_003635375.2	100853490	-0.164	0.896955	3.79	0.0114744
PREDICTED: 3-isopropylmalate dehydratase small subunit 3 [Vitis vinifera]	XP_010647190.1	100241307	0.533	0.554346	2.7	0.010955
PREDICTED: splicing factor 3B subunit 2 [Vitis vinifera]	XP_002270799.3	100241488	0.038	0.971376	1.51	0.173117
PREDICTED: phosphoglycolate phosphatase 1B, chloroplastic [Vitis vinifera]	XP_002268808.3		-1.42	0.0618742	2.19	0.00868715
PREDICTED: uncharacterized protein LOC104878183 [Vitis vinifera]	XP_010646355.1	104878183	1.6	0.194203	-0.13	0.912286
PREDICTED: universal stress protein PHOS32 [Vitis vinifera]	XP_010646368.1	100855106	-0.016	0.985046	1.63	0.0767026
PREDICTED: 40S ribosomal protein S8 [Vitis vinifera]	XP_010646836.1		0.756	0.478832	1.01	0.348725
putative ripening-related protein [Vitis vinifera]	CAB85627.1	100233109	0.764	0.508598	-4.31	0.00295619
putative ripening-related protein [Vitis vinifera]	CAB85631.1	100232888	-0.351	0.622514	1.3	0.0891051
putative thaumatin-like protein, partial [Vitis vinifera]	CAB85636.1	100232879	0.569	0.587331	-1.15	0.28352
PREDICTED: uncharacterized protein LOC100260557 isoform X1 [Vitis vinifera]	XP_010645066.1	100260557	-1.51	0.109658	-1.31	0.160202
temperature-induced lipocalin [Vitis vinifera]	ABB02395.1	100265927	-0.0577	0.931837	2.65	0.00229503
malate dehydrogenase [Vitis vinifera]	AAF69802.1	100232859	0.403	0.36116	1.23	0.0149914
superoxide dismutase [Vitis vinifera]	AKG51696.1	100233137	-1.28	0.00297301	0.936	0.0176345
polyphenol oxidase [Vitis vinifera]	AKG51698.1		-0.0232	0.968392	-2.12	0.003818
ATP synthase CF1 alpha subunit (chloroplast) [Vitis vinifera]	ABE47519.1	4025114	-2.23	0.000696934	-0.225	0.641748
ATP synthase CF0 subunit I (chloroplast) [Vitis vinifera]	ABE47520.1	4025115	-0.865	0.586745	-0.132	0.933374
photosystem II protein D2 (chloroplast) [Vitis vinifera]	ABE47529.1	4025083	-1.66	0.136024	-3.61	0.00533477
photosystem II CP43 chlorophyll apoprotein (chloroplast) [Vitis vinifera]	ABE47530.1	4025084	-2.84	0.0187756	-4.08	0.00233069
photosystem I P700 apoprotein A2 (chloroplast) [Vitis vinifera]	ABE47533.1	4025090	0.154	0.92995	-1.38	0.438051
photosystem I P700 apoprotein A1 (chloroplast) [Vitis vinifera]	ABE47534.1	4025091	-1.25	0.250263	-0.135	0.89797
ATP synthase CF1 epsilon subunit (chloroplast) [Vitis vinifera]	ABE47540.1	4025007	0.417	0.359344	0.8	0.0945468
ATP synthase CF1 beta subunit (chloroplast) [Vitis vinifera]	ABE47541.1	4025008	-1.32	0.00326698	0.469	0.20436
photosystem II cytochrome b559 alpha subunit (chloroplast) [Vitis vinifera]	ABE47551.1	4025054	-0.922	0.41432	-0.307	0.782698
ribosomal protein S18 (chloroplast) [Vitis vinifera]	ABE47556.1	7498604	2.88	0.227557	-0.103	0.964333
ribosomal protein L36 (chloroplast) [Vitis vinifera]	ABE47567.1	7498541	-0.044	0.967971	1.77	0.128418
ribosomal protein L14 (chloroplast) [Vitis vinifera]	ABE47570.1	4025019	-1.57	0.256813	-0.115	0.931668
photosystem I subunit VII (chloroplast) [Vitis vinifera]	ABE47586.1	7498557	0.416	0.390973	2.04	0.00125772
ribosomal protein S15 (chloroplast) [Vitis vinifera]	ABE47592.1	7498561	1.3	0.214109	-0.0508	0.959873
ribosomal protein S7 (chloroplast) [Vitis vinifera]	ABE47595.1	4025062	1.43	0.439748	1.69	0.364829

## Sheet: Table S2
Table S2. List of significant V. vinifera proteins differentially accumulated at 6 hpi (p-value < 0.05).
Protein Name	Protein acc. nº (NCBI)	Gene ID	Fold change 6 hpi (log2; P. viticola vs mock inoculated leaf)	6 hpi p-value
PREDICTED: MLP-like protein 423 [Vitis vinifera]	XP_002267219.1	100243241	4.25	5.28421e-07
uncharacterized protein LOC100267074 [Vitis vinifera]	NP_001267956.1	100267074	-4.29	6.2633e-07
PREDICTED: thiol protease aleurain-like isoform X1 [Vitis vinifera]	XP_002278624.1	100244107	-6.62	1.00766e-06
PREDICTED: MAR-binding filament-like protein 1-1 isoform X1 [Vitis vinifera]	XP_002284745.2	100249815	3.85	6.22283e-06
PREDICTED: major allergen Pru ar 1 [Vitis vinifera]	XP_002273790.2	100253292	3.04	1.12317e-05
PREDICTED: chlorophyll a-b binding protein CP29.1, chloroplastic [Vitis vinifera]	XP_002279834.1	100266604	-4.49	1.301e-05
lipid transfer protein precursor [Vitis vinifera]	NP_001268074.1	100233106	-5.67	1.95715e-05
PREDICTED: endo-1,3;1,4-beta-D-glucanase [Vitis vinifera]	XP_002275697.1	100257884	-5.25	6.93649e-05
PREDICTED: aspartic proteinase A1 [Vitis vinifera]	XP_002262915.2	100233021	-2.62	7.03509e-05
PREDICTED: thiamine thiazole synthase 2, chloroplastic [Vitis vinifera]	XP_002267414.1	100265774	5.16	0.000159135
PREDICTED: uncharacterized protein LOC100251922 [Vitis vinifera]	XP_002262747.1	100251922	4.35	0.000162694
PREDICTED: copper transport protein ATX1 [Vitis vinifera]	XP_002264332.1	100247137	3.84	0.000198043
PREDICTED: signal recognition particle 43 kDa protein, chloroplastic [Vitis vinifera]	XP_002282206.1	100243569	3.67	0.000199482
PREDICTED: rho-N domain-containing protein 1, chloroplastic [Vitis vinifera]	XP_002277984.1	100261778	2.29	0.000210817
PREDICTED: uncharacterized protein LOC100245386 [Vitis vinifera]	XP_002264554.1	100245386	2.39	0.000260037
PREDICTED: cysteine proteinase RD21A [Vitis vinifera]	XP_002285299.1	100252080	-2.26	0.000269799
PREDICTED: major allergen Pru av 1 [Vitis vinifera]	XP_002274617.1	100256795	-2.61	0.000275425
PREDICTED: clathrin light chain 1 [Vitis vinifera]	XP_003635272.1	100854215	2.1	0.000283761
PREDICTED: small heat shock protein, chloroplastic [Vitis vinifera]	XP_002272418.1	100267630	-5.98	0.000339387
PREDICTED: ATP synthase gamma chain, chloroplastic [Vitis vinifera]	XP_002275015.1	100264091	-2.04	0.000436331
PREDICTED: nascent polypeptide-associated complex subunit alpha-like protein 2 [Vitis vinifera]	XP_003634163.1	100854239	3.41	0.000468658
PREDICTED: chaperone protein ClpB4, mitochondrial [Vitis vinifera]	XP_002282880.1	100247399	-3.74	0.000478459
PREDICTED: 2-C-methyl-D-erythritol 4-phosphate cytidylyltransferase, chloroplastic [Vitis vinifera]	XP_002268908.1	100247263	-2.4	0.000530616
PREDICTED: plastoglobulin-1, chloroplastic [Vitis vinifera]	XP_002276479.1	100264252	-2.98	0.000569548
PREDICTED: superoxide dismutase [Cu-Zn] isoform X3 [Vitis vinifera]	XP_002268436.1	100241809	-2.22	0.000596295
hypothetical protein VITISV_028922 [Vitis vinifera]	CAN78612.1	104879610	2.22	0.000620219
PREDICTED: 29 kDa ribonucleoprotein A, chloroplastic [Vitis vinifera]	XP_002281642.1	100246501	1.92	0.00064391
PREDICTED: phosphoribulokinase, chloroplastic [Vitis vinifera]	XP_002263724.1	100244092	-2	0.000647495
PREDICTED: RNA-binding protein CP29B, chloroplastic [Vitis vinifera]	XP_002279685.1	100243747	3.45	0.000661969
ATP synthase CF1 alpha subunit (chloroplast) [Vitis vinifera]	ABE47519.1	4025114	-2.23	0.000696934
hypothetical protein VITISV_022886 [Vitis vinifera]	CAN70311.1		-4.43	0.000718351
unnamed protein product, partial [Vitis vinifera]	CBI17131.3	100233100	-2.69	0.000743389
PREDICTED: 50S ribosomal protein L1, chloroplastic [Vitis vinifera]	XP_002274498.1	100244868	2.03	0.000785308
PREDICTED: UBA and UBX domain-containing protein At4g15410 isoform X2 [Vitis vinifera]	XP_010645353.1		-2.31	0.000843656
PREDICTED: adenosine kinase 2 [Vitis vinifera]	XP_002272669.1	100241094	1.94	0.000875407
PREDICTED: photosynthetic NDH subunit of lumenal location 5, chloroplastic [Vitis vinifera]	XP_002265030.2	100248997	-2.67	0.000938555
PREDICTED: malate dehydrogenase [NADP], chloroplastic [Vitis vinifera]	XP_002265080.1	100247974	-2.7	0.000956303
PREDICTED: pathogen-related protein [Vitis vinifera]	XP_002263092.1	100248978	-2.57	0.000959328
hypothetical protein VITISV_017654 [Vitis vinifera]	CAN82383.1		-1.78	0.00120677
PREDICTED: transketolase, chloroplastic [Vitis vinifera]	XP_002266494.2	100248004	-3.45	0.00121135
PREDICTED: cysteine protease RD19A [Vitis vinifera]	XP_002275759.1	100233020	-2.26	0.0012153
unnamed protein product, partial [Vitis vinifera]	CBI15787.3	104879510	1.91	0.00124884
PREDICTED: peptidyl-prolyl cis-trans isomerase [Vitis vinifera]	XP_002274869.1	100247119	-1.71	0.00141728
PREDICTED: serine hydroxymethyltransferase, mitochondrial [Vitis vinifera]	XP_010646402.1	100243424	-4.25	0.00171924
PREDICTED: catalase isozyme 1 [Vitis vinifera]	XP_003631925.1	100853165	-3.77	0.00189524
PREDICTED: actin-depolymerizing factor 2 [Vitis vinifera]	XP_002284292.1	100246819	-4.15	0.00191756
PREDICTED: ribulose bisphosphate carboxylase/oxygenase activase, chloroplastic [Vitis vinifera]	XP_002282979.1	100266698	1.84	0.00195807
PREDICTED: peroxidase A2 [Vitis vinifera]	XP_002285652.2	100260291	-3.63	0.00198888
PREDICTED: fructose-bisphosphate aldolase 1, chloroplastic [Vitis vinifera]	XP_003631873.1	100852851	-1.77	0.00219373
PREDICTED: adenylate kinase 4 isoform X1 [Vitis vinifera]	XP_002266762.1	100240759	-3.16	0.00219716
PREDICTED: protein PLASTID TRANSCRIPTIONALLY ACTIVE 12 isoform X2 [Vitis vinifera]	XP_002272288.2	100251522	2.77	0.00251141
PREDICTED: wound-induced basic protein [Vitis vinifera]	XP_002264634.1	100268008	4.8	0.00267941
serine/threonine kinase-like [Vitis vinifera]	NP_001268124.1	100232874	1.48	0.0026998
PREDICTED: uncharacterized protein LOC100241562 [Vitis vinifera]	XP_002285744.1	100241562	1.62	0.0027682
superoxide dismutase [Vitis vinifera]	AKG51696.1	100233137	-1.28	0.00297301
PREDICTED: V-type proton ATPase subunit G1 [Vitis vinifera]	XP_002275050.1	100251261	4.41	0.00306767
PREDICTED: actin-7 [Vitis vinifera]	XP_002282516.1	100232866	-2.63	0.00316469
PREDICTED: chlorophyll a-b binding protein of LHCII type 1 [Vitis vinifera]	XP_002283566.1	100250504	-1.59	0.00317147
PREDICTED: heterogeneous nuclear ribonucleoprotein 1 [Vitis vinifera]	XP_002274589.1	100267443	2.04	0.00317674
ATP synthase CF1 beta subunit (chloroplast) [Vitis vinifera]	ABE47541.1	4025008	-1.32	0.00326698
hypothetical protein VITISV_030335 [Vitis vinifera]	CAN62864.1		-4.24	0.00337801
PREDICTED: 50S ribosomal protein L29, chloroplastic [Vitis vinifera]	XP_003633349.1	100248255	1.4	0.00364188
PREDICTED: 30S ribosomal protein S1, chloroplastic [Vitis vinifera]	XP_002280604.1	100265325	1.69	0.00365559
PREDICTED: 18.1 kDa class I heat shock protein [Vitis vinifera]	XP_002280353.1		-1.79	0.00375038
PREDICTED: fructose-bisphosphate aldolase 1, chloroplastic [Vitis vinifera]	XP_002267726.1	100262354	-1.63	0.0037584
PREDICTED: malate dehydrogenase, mitochondrial [Vitis vinifera]	XP_002285356.1	100253724	-2.38	0.00407697
unnamed protein product, partial [Vitis vinifera]	CBI36318.3	100266263	-3.4	0.00407854
PREDICTED: uncharacterized protein LOC100249460 [Vitis vinifera]	XP_002270910.1	100249460	2	0.0043887
PREDICTED: protein TIC 62, chloroplastic isoform X2 [Vitis vinifera]	XP_002282730.1		1.42	0.00473602
PREDICTED: peroxisomal (S)-2-hydroxy-acid oxidase GLO1 isoform X2 [Vitis vinifera]	XP_010644817.1	100244701	-2.29	0.00480534
PREDICTED: protein P21 [Vitis vinifera]	XP_002282988.1	100242737	-1.79	0.00522356
unnamed protein product, partial [Vitis vinifera]	CBI34931.3		1.5	0.00524921
PREDICTED: probable mitochondrial-processing peptidase subunit beta, mitochondrial [Vitis vinifera]	XP_002284370.1	100259477	-2.75	0.00531099
PREDICTED: nucleoid-associated protein At4g30620, chloroplastic [Vitis vinifera]	XP_002277907.1	100243229	1.32	0.00542152
PREDICTED: lactoylglutathione lyase isoform X2 [Vitis vinifera]	XP_003632261.1	100244888	-1.85	0.00551093
PREDICTED: 30S ribosomal protein S17, chloroplastic [Vitis vinifera]	XP_002284468.1	100251530	1.99	0.00554201
PREDICTED: ATP synthase subunit beta, mitochondrial [Vitis vinifera]	XP_002280824.1	100259544	-1.45	0.00565653
PREDICTED: photosystem II 22 kDa protein, chloroplastic [Vitis vinifera]	XP_002285857.1	100245393	-2.77	0.00566302
PREDICTED: stromal 70 kDa heat shock-related protein, chloroplastic [Vitis vinifera]	XP_002282802.1	100248235	-2.64	0.00578694
PREDICTED: peptide methionine sulfoxide reductase A1 [Vitis vinifera]	XP_002281325.1	100258013	-1.75	0.00583162
PREDICTED: uncharacterized protein LOC100245470 [Vitis vinifera]	XP_002279226.1	100245470	-3.26	0.00584232
PREDICTED: FKBP12-interacting protein of 37 kDa isoform X1 [Vitis vinifera]	XP_002281490.1	100246679	2.5	0.00594403
PREDICTED: carbonic anhydrase 2 isoform X1 [Vitis vinifera]	XP_002277957.1	100249137	-2.84	0.00615557
PREDICTED: hsp70-binding protein 1 [Vitis vinifera]	XP_002269511.1	100261411	3.03	0.00648287
PREDICTED: 18.2 kDa class I heat shock protein [Vitis vinifera]	XP_002281354.1	100249533	-1.84	0.0065881
PREDICTED: serine/arginine-rich splicing factor SR34A-like [Vitis vinifera]	XP_003634148.2		2.56	0.00721426
PREDICTED: probable plastid-lipid-associated protein 13, chloroplastic [Vitis vinifera]	XP_002279430.1	100246993	-1.26	0.00739301
PREDICTED: calvin cycle protein CP12-3, chloroplastic [Vitis vinifera]	XP_002276622.1	100251226	-1.48	0.00744403
unnamed protein product, partial [Vitis vinifera]	CBI34046.3	100245219	1.44	0.00747814
PREDICTED: 50S ribosomal protein L24, chloroplastic [Vitis vinifera]	XP_010644320.1	100250357	2.25	0.00772808
PREDICTED: eukaryotic translation initiation factor 3 subunit I [Vitis vinifera]	XP_002285281.1	100250769	3.28	0.00779614
PREDICTED: thylakoid lumenal 16.5 kDa protein, chloroplastic [Vitis vinifera]	XP_002285317.1	100257780	1.23	0.00791827
PREDICTED: thioredoxin-like 4, chloroplastic isoform X1 [Vitis vinifera]	XP_002284743.1	100267745	-2.31	0.00807292
PREDICTED: uncharacterized protein LOC100264984 [Vitis vinifera]	XP_002267043.1	100264984	3.71	0.00819267
PREDICTED: histone H3.2 [Vitis vinifera]	XP_002264961.1	100263009	-4.88	0.00871851
PREDICTED: uncharacterized protein LOC100260869 [Vitis vinifera]	XP_002285906.2		-1.35	0.00920588
PREDICTED: ferredoxin--NADP reductase, leaf-type isozyme, chloroplastic [Vitis vinifera]	XP_002265774.1	100241976	-1.71	0.00930714
PREDICTED: uncharacterized protein At1g32220, chloroplastic isoform X1 [Vitis vinifera]	XP_002278389.2	100247104	-2.1	0.00932422
PREDICTED: uncharacterized protein LOC100264617 [Vitis vinifera]	XP_002275276.3	100264617	1.31	0.00940559
PREDICTED: peptidyl-prolyl cis-trans isomerase FKBP13, chloroplastic [Vitis vinifera]	XP_002272628.1	100262788	-1.46	0.00952251
PREDICTED: major allergen Pru av 1 [Vitis vinifera]	XP_002274242.1	100249884	-1.36	0.00963027
PREDICTED: uncharacterized protein C6C3.02c [Vitis vinifera]	XP_002269289.1	100253947	-2.66	0.00964889
PREDICTED: auxin-repressed 12.5 kDa protein isoform X1 [Vitis vinifera]	XP_002279836.1	100260521	-1.54	0.0103316
PREDICTED: chlorophyll a-b binding protein CP26, chloroplastic [Vitis vinifera]	XP_002264295.1	100246457	-1.51	0.0105177
unnamed protein product, partial [Vitis vinifera]	CBI30370.3	100259748	-1.11	0.0105254
unnamed protein product, partial [Vitis vinifera]	CBI38929.3	100255187	2.9	0.0105703
PREDICTED: polyadenylate-binding protein RBP45 [Vitis vinifera]	XP_002280601.1	100250363	3.18	0.0107964
PREDICTED: ribulose bisphosphate carboxylase small chain, chloroplastic [Vitis vinifera]	XP_002276967.1	100267942	-1.84	0.0109701
PREDICTED: UTP--glucose-1-phosphate uridylyltransferase isoform X1 [Vitis vinifera]	XP_002282276.1	100253896	-3.15	0.0116092
PREDICTED: major allergen Pru av 1 [Vitis vinifera]	XP_002274309.1	100244758	-2.77	0.0116221
hypothetical protein VITISV_012048 [Vitis vinifera]	CAN69132.1		-1.43	0.0117831
PREDICTED: 14-3-3 protein 7 isoform X1 [Vitis vinifera]	XP_002285787.1	100247183	-1.97	0.0118225
PREDICTED: haloacid dehalogenase-like hydrolase domain-containing protein At3g48420 [Vitis vinifera]	XP_002277650.1	100253525	2.74	0.0120946
PREDICTED: CDGSH iron-sulfur domain-containing protein NEET [Vitis vinifera]	XP_002269624.1	100263402	-2.8	0.0121261
PREDICTED: MLP-like protein 28 isoform X2 [Vitis vinifera]	XP_002284578.2	100262819	-1.64	0.0121624
PREDICTED: glyoxylate/succinic semialdehyde reductase 2, chloroplastic isoform X2 [Vitis vinifera]	XP_002280297.1	100241231	4.18	0.0123496
PREDICTED: nudix hydrolase 26, chloroplastic isoform X1 [Vitis vinifera]	XP_002263671.1	100253524	3.18	0.0123894
PREDICTED: polyadenylate-binding protein 2 [Vitis vinifera]	XP_002279148.1	100242522	1.7	0.0124387
PREDICTED: uncharacterized protein LOC100260183 [Vitis vinifera]	XP_002275801.1	100260183	-1.76	0.0126652
PREDICTED: protein MODIFIER OF SNC1 11 isoform X1 [Vitis vinifera]	XP_002276541.1	100249849	1.22	0.0127958
PREDICTED: 60S ribosomal protein L19-2 [Vitis vinifera]	XP_002272357.1	100246855	3.1	0.0130499
PREDICTED: late embryogenesis abundant protein D-29 [Vitis vinifera]	XP_002268697.1	100252810	-2.47	0.0135181
PREDICTED: peptidyl-prolyl cis-trans isomerase FKBP17-2, chloroplastic [Vitis vinifera]	XP_003634204.1	100853930	2.72	0.0137094
PREDICTED: probable bifunctional methylthioribulose-1-phosphate dehydratase/enolase-phosphatase E1 1 [Vitis vinifera]	XP_002285049.1	100257258	-1.72	0.0140854
PREDICTED: 26S proteasome non-ATPase regulatory subunit 14 homolog [Vitis vinifera]	XP_002284566.1	100247098	-2.73	0.0141181
PREDICTED: probable plastid-lipid-associated protein 6, chloroplastic [Vitis vinifera]	XP_002285326.1	100254627	-1.13	0.014584
PREDICTED: uncharacterized protein LOC100265554 [Vitis vinifera]	XP_002280087.1	100265554	1.37	0.0149147
PREDICTED: uncharacterized protein LOC100260874 [Vitis vinifera]	XP_002285869.2	100260874	4.24	0.0151172
PREDICTED: 28 kDa ribonucleoprotein, chloroplastic [Vitis vinifera]	XP_002270233.1	100266472	1.53	0.0151812
PREDICTED: 15.7 kDa heat shock protein, peroxisomal [Vitis vinifera]	XP_002283860.1	100254799	3.9	0.0154586
PREDICTED: small heat shock protein, chloroplastic [Vitis vinifera]	XP_002272065.1	100261354	-1.09	0.0154986
PREDICTED: 30S ribosomal protein S31, chloroplastic [Vitis vinifera]	XP_002274396.3	100258002	4	0.0155873
unnamed protein product, partial [Vitis vinifera]	CBI39540.3	100259659	-2.26	0.0156181
PREDICTED: chloroplastic lipocalin [Vitis vinifera]	XP_010644414.1	100250424	-1.35	0.0158218
PREDICTED: 30S ribosomal protein S20, chloroplastic [Vitis vinifera]	XP_002285149.1	100265925	1.13	0.0160858
PREDICTED: soluble inorganic pyrophosphatase 4 [Vitis vinifera]	XP_002278867.1	100258490	-2.06	0.0165782
PREDICTED: heterogeneous nuclear ribonucleoprotein 1 [Vitis vinifera]	XP_002277226.1	100246013	0.991	0.0166306
PREDICTED: uncharacterized protein LOC100263834 [Vitis vinifera]	XP_002271931.1	100263834	-2.87	0.0168507
PREDICTED: L-ascorbate peroxidase 2, cytosolic [Vitis vinifera]	XP_002284767.1	100233013	-1.05	0.017285
PREDICTED: uncharacterized protein LOC100248862 isoform X2 [Vitis vinifera]	XP_002277728.1	100248862	2.85	0.0173484
PREDICTED: 22.0 kDa class IV heat shock protein [Vitis vinifera]	XP_002263376.1	100263588	-3.19	0.0175099
PREDICTED: elongation factor 1-alpha [Vitis vinifera]	XP_002277159.1	100261589	-3.06	0.0178718
PREDICTED: uncharacterized protein LOC100240762 [Vitis vinifera]	XP_002270167.1	100240762	1.61	0.0182489
photosystem II CP43 chlorophyll apoprotein (chloroplast) [Vitis vinifera]	ABE47530.1	4025084	-2.84	0.0187756
PREDICTED: glyceraldehyde-3-phosphate dehydrogenase B, chloroplastic [Vitis vinifera]	XP_002273754.1	100259814	-0.964	0.0191979
PREDICTED: protein PLASTID TRANSCRIPTIONALLY ACTIVE 7 isoform X2 [Vitis vinifera]	XP_002266725.1	100244197	3.45	0.0193956
hypothetical protein VITISV_030871 [Vitis vinifera]	CAN82836.1		1.81	0.0194785
PREDICTED: nascent polypeptide-associated complex subunit alpha-like protein 1 [Vitis vinifera]	XP_003632619.1	100243098	1.3	0.0198571
PREDICTED: fructose-1,6-bisphosphatase, chloroplastic [Vitis vinifera]	XP_002276567.1	100240924	-1.83	0.0206499
PREDICTED: ubiquitin receptor RAD23c [Vitis vinifera]	XP_002283656.1	100244610	2.82	0.0208554
PREDICTED: survival of motor neuron-related-splicing factor 30 [Vitis vinifera]	XP_002269518.2	100257533	3.23	0.0210265
PREDICTED: uncharacterized protein LOC100253402 [Vitis vinifera]	XP_002266468.1	100253402	-2.47	0.0215353
PREDICTED: heat shock 70 kDa protein, mitochondrial isoform X1 [Vitis vinifera]	XP_002263457.1	100250929	-2.1	0.022046
PREDICTED: 50S ribosomal protein L3, chloroplastic [Vitis vinifera]	XP_002271466.1	100267754	2.36	0.0224479
unnamed protein product, partial [Vitis vinifera]	CBI34488.3	100263310	-3.93	0.0226668
unnamed protein product, partial [Vitis vinifera]	CBI23720.3	104879303	2.88	0.0232336
PREDICTED: 30S ribosomal protein 2, chloroplastic [Vitis vinifera]	XP_002265629.1	100266645	1.03	0.0235833
PREDICTED: nascent polypeptide-associated complex subunit alpha-like protein 1 [Vitis vinifera]	XP_002266597.1	100245825	0.897	0.0239743
PREDICTED: acyl carrier protein 1, chloroplastic [Vitis vinifera]	XP_002267614.1	100253968	4.59	0.0241865
PREDICTED: UBP1-associated protein 2C [Vitis vinifera]	XP_010644134.1	100248626	-1.41	0.0244799
PREDICTED: thiosulfate sulfurtransferase 16, chloroplastic [Vitis vinifera]	XP_002271073.3	100259157	0.942	0.0248765
PREDICTED: probable alpha-mannosidase At5g13980 [Vitis vinifera]	XP_002280858.1	100249067	-3	0.0252889
ribulose-1,5-bisphosphate carboxylase/oxygenase large subunit, partial (chloroplast) [Vitis vinifera]	CAG25748.1		-1.52	0.0253066
unnamed protein product, partial [Vitis vinifera]	CBI38418.3	100250759	2.74	0.0264485
PREDICTED: arginine biosynthesis bifunctional protein ArgJ, chloroplastic-like [Vitis vinifera]	XP_002274213.2	100253362	1.93	0.0276676
PREDICTED: glutamate-1-semialdehyde 2,1-aminomutase, chloroplastic [Vitis vinifera]	XP_002284200.1	100250737	-3.53	0.027819
unnamed protein product, partial [Vitis vinifera]	CBI40498.3	100255153	-1.33	0.0281832
unnamed protein product, partial [Vitis vinifera]	CBI23563.3		1.32	0.0282403
PREDICTED: alpha-L-arabinofuranosidase 1 [Vitis vinifera]	XP_002283975.1	100258574	-2.53	0.0284094
unnamed protein product, partial [Vitis vinifera]	CBI28195.3	100855207	3.34	0.0294324
PREDICTED: uracil phosphoribosyltransferase [Vitis vinifera]	XP_002273489.1	100261300	3.2	0.0302841
PREDICTED: glutathione S-transferase DHAR3, chloroplastic isoform X1 [Vitis vinifera]	XP_002266106.1	100258402	-0.805	0.0329408
PREDICTED: protein P21 [Vitis vinifera]	XP_002283030.1	100259841	2.31	0.0336964
unnamed protein product, partial [Vitis vinifera]	CBI26950.3	100267988	-1.14	0.0337036
PREDICTED: peptidyl-prolyl cis-trans isomerase [Vitis vinifera]	XP_002273421.2	100250386	2.12	0.0340532
PREDICTED: aminomethyltransferase, mitochondrial [Vitis vinifera]	XP_002272701.1	100250401	-1.74	0.0348854
PREDICTED: DNA-directed RNA polymerases II and V subunit 8A [Vitis vinifera]	XP_002274171.1	100254322	1.96	0.0349172
PREDICTED: protein YLS3 [Vitis vinifera]	XP_002285691.1	100267331	-2.78	0.034942
14-3-3 protein [Vitis vinifera]	NP_001267852.1	100257548	-1.51	0.0358434
PREDICTED: 28 kDa ribonucleoprotein, chloroplastic [Vitis vinifera]	XP_002278832.1	100257045	1.43	0.0358943
PREDICTED: acetyl-coenzyme A carboxylase carboxyl transferase subunit alpha, chloroplastic [Vitis vinifera]	XP_002269834.1	100256854	-2.59	0.036128
PREDICTED: 14-3-3-like protein [Vitis vinifera]	XP_002262802.1	100264912	-1.29	0.03662
PREDICTED: probable WRKY transcription factor 20 isoform X1 [Vitis vinifera]	XP_002272407.1	100256306	1.72	0.0379321
PREDICTED: protein LHCP TRANSLOCATION DEFECT [Vitis vinifera]	XP_002281441.1	100260680	1.63	0.0380972
PREDICTED: aspartyl protease AED3 [Vitis vinifera]	XP_002283889.2	100252287	-1.88	0.0383729
PREDICTED: 2-methylene-furan-3-one reductase [Vitis vinifera]	XP_003631255.1	100852555	-0.811	0.0385
PREDICTED: low-temperature-induced cysteine proteinase [Vitis vinifera]	XP_002284973.1	100241957	-3.81	0.0385283
PREDICTED: uncharacterized protein DDB_G0288133 [Vitis vinifera]	XP_002266051.1	100265608	0.845	0.0385922
PREDICTED: uncharacterized protein LOC100266227 isoform X2 [Vitis vinifera]	XP_002280489.1	100266227	-1.73	0.0386464
PREDICTED: glyceraldehyde-3-phosphate dehydrogenase, cytosolic [Vitis vinifera]	XP_002263145.2	100233024	-1.09	0.0387271
PREDICTED: probable NADH dehydrogenase [ubiquinone] 1 alpha subcomplex subunit 5, mitochondrial [Vitis vinifera]	XP_002276087.1	100249252	0.937	0.0390858
PREDICTED: fruit protein pKIWI502 [Vitis vinifera]	XP_002283966.1	100255949	2.02	0.0392768
PREDICTED: chloroplast stem-loop binding protein of 41 kDa b, chloroplastic [Vitis vinifera]	XP_002281395.1	100261308	-2.54	0.0393837
PREDICTED: membrane-associated protein VIPP1, chloroplastic isoform X1 [Vitis vinifera]	XP_002276816.1	100249595	0.787	0.0394892
PREDICTED: uncharacterized protein LOC100243384 isoform X1 [Vitis vinifera]	XP_002276984.1	100243384	1.06	0.0403047
PREDICTED: thylakoid lumenal 17.9 kDa protein, chloroplastic [Vitis vinifera]	XP_002280221.1	100262841	3.33	0.040399
PREDICTED: elongation factor TuB, chloroplastic [Vitis vinifera]	XP_002277301.1	100244975	-0.922	0.0405192
PREDICTED: CBS domain-containing protein CBSX1, chloroplastic [Vitis vinifera]	XP_002283079.1	100257777	0.936	0.0405708
PREDICTED: polyadenylate-binding protein 8 [Vitis vinifera]	XP_002284923.1	100255846	1.74	0.0408669
PREDICTED: 40S ribosomal protein S14 [Vitis vinifera]	XP_002274381.1	100248468	-1.71	0.0409606
unnamed protein product, partial [Vitis vinifera]	CBI21204.3	100256565	1.62	0.0421955
PREDICTED: uncharacterized protein LOC100241479 [Vitis vinifera]	XP_002267558.1	100241479	1.65	0.0428073
PREDICTED: psbP domain-containing protein 4, chloroplastic isoform X1 [Vitis vinifera]	XP_002265695.1	100252244	-0.913	0.0433547
PREDICTED: eukaryotic translation initiation factor 4B3 [Vitis vinifera]	XP_002275899.1	100262348	2.17	0.0442792
PREDICTED: uncharacterized protein OsI_027940 isoform X1 [Vitis vinifera]	XP_002264898.1	100258848	2.52	0.044669
PREDICTED: uncharacterized protein LOC100265785 isoform X1 [Vitis vinifera]	XP_002284553.1	100265785	1.44	0.0447209
PREDICTED: enolase 1 [Vitis vinifera]	XP_002283632.1	100242642	-1.22	0.0472359
PREDICTED: ankyrin repeat domain-containing protein 2B isoform X1 [Vitis vinifera]	XP_010645415.1	100258947	3.69	0.0479416
PREDICTED: uncharacterized protein LOC100247999 [Vitis vinifera]	XP_002267727.1	100247999	2.62	0.0486965
PREDICTED: uncharacterized protein LOC100258138 isoform X1 [Vitis vinifera]	XP_002266002.1	100258138	3.22	0.0489725
unnamed protein product, partial [Vitis vinifera]	CBI24644.3		2.64	0.049348
PREDICTED: 23.6 kDa heat shock protein, mitochondrial [Vitis vinifera]	XP_002270632.1	100243757	-0.935	0.0496328

## Sheet: Table S3
Table S3. List of significant V. vinifera proteins differentially accumulated at 12 hpi (p-value < 0.05).
Protein Name	Protein acc. nº (NCBI)	Gene ID	Fold change 12 hpi (log2; P. viticola vs mock inoculated leaf)	12 hpi p-value
PREDICTED: heat shock cognate 70 kDa protein 2 [Vitis vinifera]	XP_002283532.2	100254725	6.58	7.94461e-07
PREDICTED: glutamine synthetase leaf isozyme, chloroplastic [Vitis vinifera]	XP_002279497.1	100261413	4.18	5.23317e-06
PREDICTED: aminomethyltransferase, mitochondrial [Vitis vinifera]	XP_002272701.1	100250401	5.42	1.57698e-05
PREDICTED: ruBisCO large subunit-binding protein subunit beta, chloroplastic [Vitis vinifera]	XP_002285746.1	100263832	3.82	2.54371e-05
PREDICTED: hsp70-Hsp90 organizing protein 3 [Vitis vinifera]	XP_003635686.2	100855394	3.45	3.07715e-05
PREDICTED: probable protein disulfide-isomerase A6 [Vitis vinifera]	XP_002282603.1	100258052	2.72	3.88489e-05
PREDICTED: haloacid dehalogenase-like hydrolase domain-containing protein At3g48420 [Vitis vinifera]	XP_002277650.1	100253525	6.04	4.64126e-05
PREDICTED: soluble inorganic pyrophosphatase 4 [Vitis vinifera]	XP_002278867.1	100258490	4.73	5.40561e-05
PREDICTED: glyceraldehyde-3-phosphate dehydrogenase B, chloroplastic [Vitis vinifera]	XP_002273754.1	100259814	2.24	6.35056e-05
PREDICTED: triosephosphate isomerase, cytosolic [Vitis vinifera]	XP_002283693.1	100263345	5.23	6.55739e-05
PREDICTED: chloroplast stem-loop binding protein of 41 kDa a, chloroplastic [Vitis vinifera]	XP_002275066.1	100266662	2.48	6.93555e-05
PREDICTED: 60S ribosomal protein L4 [Vitis vinifera]	XP_002285741.1	100251826	-2.75	8.71252e-05
PREDICTED: protein THYLAKOID FORMATION1, chloroplastic [Vitis vinifera]	XP_002275686.2	100259646	2.91	9.5845e-05
PREDICTED: luminal-binding protein 5 [Vitis vinifera]	XP_002263323.1	100251379	4.09	9.75411e-05
putative ripening-related protein [Vitis vinifera]	CAB85626.1	100232885	-2.44	0.000101183
PREDICTED: enolase 1 [Vitis vinifera]	XP_002283632.1	100242642	3.29	0.000106877
PREDICTED: triosephosphate isomerase, chloroplastic [Vitis vinifera]	XP_002274871.1	100260576	3.48	0.000139917
PREDICTED: uncharacterized protein At5g39570 [Vitis vinifera]	XP_002283932.1	100252475	2.81	0.000171346
unnamed protein product, partial [Vitis vinifera]	CBI39678.3	104881374	-4.64	0.000193088
PREDICTED: RNA-binding protein 8A [Vitis vinifera]	XP_002281228.1	100260882	-2.17	0.000197475
serine/threonine kinase-like [Vitis vinifera]	NP_001268124.1	100232874	-2.1	0.000215569
PREDICTED: malate dehydrogenase, cytoplasmic [Vitis vinifera]	XP_002278636.2	100253273	4.25	0.000221036
PREDICTED: fructose-bisphosphate aldolase 1, chloroplastic [Vitis vinifera]	XP_003631873.1	100852851	2.32	0.000308501
PREDICTED: 30S ribosomal protein S1, chloroplastic [Vitis vinifera]	XP_002280604.1	100265325	2.39	0.000316758
PREDICTED: malate dehydrogenase [NADP], chloroplastic [Vitis vinifera]	XP_002265080.1	100247974	3.13	0.000317615
PREDICTED: probable L-ascorbate peroxidase 6, chloroplastic isoform X2 [Vitis vinifera]	XP_003634424.1	100254009	2.87	0.00032129
PREDICTED: ferredoxin--NADP reductase, leaf-type isozyme, chloroplastic [Vitis vinifera]	XP_002265774.1	100241976	2.82	0.000335312
PREDICTED: thioredoxin-like protein CDSP32, chloroplastic [Vitis vinifera]	XP_002285902.1	100259132	5.46	0.000356862
PREDICTED: 26S protease regulatory subunit 6A homolog [Vitis vinifera]	XP_002271397.1	100256329	3.98	0.000387577
PREDICTED: trigger factor-like protein TIG, Chloroplastic [Vitis vinifera]	XP_002277545.1	100243475	4.67	0.000399458
PREDICTED: 40S ribosomal protein S17 [Vitis vinifera]	XP_002268997.1	100243000	-2.13	0.000550186
PREDICTED: MAR-binding filament-like protein 1-1 isoform X1 [Vitis vinifera]	XP_002284745.2	100249815	2.21	0.000644685
PREDICTED: U2 small nuclear ribonucleoprotein A' [Vitis vinifera]	XP_002275396.1	100264276	-2.1	0.000677796
PREDICTED: soluble inorganic pyrophosphatase 1 [Vitis vinifera]	XP_002264695.2	100254798	4.78	0.000681857
PREDICTED: ruBisCO large subunit-binding protein subunit beta, chloroplastic [Vitis vinifera]	XP_002284134.1	100261815	3.09	0.000723485
PREDICTED: uncharacterized protein LOC100258718 [Vitis vinifera]	XP_002280988.1	100258718	2.1	0.000814801
PREDICTED: fruit protein pKIWI502 [Vitis vinifera]	XP_002283966.1	100255949	3.99	0.000816136
PREDICTED: psbP domain-containing protein 1, chloroplastic [Vitis vinifera]	XP_002281448.2	100259632	-1.94	0.000831282
PREDICTED: nascent polypeptide-associated complex subunit alpha-like protein 1 [Vitis vinifera]	XP_003632619.1	100243098	-2.19	0.000853281
PREDICTED: L-ascorbate peroxidase 2, cytosolic [Vitis vinifera]	XP_002284767.1	100233013	1.71	0.000882529
PREDICTED: probable pyridoxal 5'-phosphate synthase subunit PDX1 [Vitis vinifera]	XP_002278391.1	100260451	4.17	0.000925677
PREDICTED: uncharacterized protein LOC100854844 [Vitis vinifera]	XP_003634833.1	100854844	2.46	0.000946716
PREDICTED: cytochrome b-c1 complex subunit 7-2 isoform X1 [Vitis vinifera]	XP_002284960.1	100257612	-2.72	0.000952089
PREDICTED: ribulose bisphosphate carboxylase/oxygenase activase, chloroplastic [Vitis vinifera]	XP_002270571.2	100256315	2.27	0.00096023
PREDICTED: 40S ribosomal protein S14 [Vitis vinifera]	XP_002274381.1	100248468	-3.33	0.000967443
unnamed protein product, partial [Vitis vinifera]	CBI24299.3	100261522	1.9	0.00100927
PREDICTED: 29 kDa ribonucleoprotein A, chloroplastic [Vitis vinifera]	XP_002281642.1	100246501	-1.8	0.00103317
unnamed protein product, partial [Vitis vinifera]	CBI19198.3	104882489	2	0.00104161
PREDICTED: histone H4 [Vitis vinifera]	XP_002283894.1		-1.92	0.00110631
PREDICTED: probable NADH dehydrogenase [ubiquinone] 1 alpha subcomplex subunit 5, mitochondrial [Vitis vinifera]	XP_002276087.1	100249252	1.77	0.00112851
PREDICTED: protein MODIFIER OF SNC1 11 isoform X1 [Vitis vinifera]	XP_002276541.1	100249849	-1.8	0.00121272
PREDICTED: 26S proteasome non-ATPase regulatory subunit 4 homolog [Vitis vinifera]	XP_002264558.1	100257366	2.89	0.00122485
photosystem I subunit VII (chloroplast) [Vitis vinifera]	ABE47586.1	7498557	2.04	0.00125772
PREDICTED: elongation factor TuB, chloroplastic [Vitis vinifera]	XP_002277301.1	100244975	1.72	0.00130856
PREDICTED: 60S ribosomal protein L13-1 [Vitis vinifera]	XP_002274000.1	100257471	-4.58	0.00140356
PREDICTED: peptidyl-prolyl cis-trans isomerase FKBP62 [Vitis vinifera]	XP_002263566.2	100266654	4.17	0.00143544
PREDICTED: H/ACA ribonucleoprotein complex subunit 1 [Vitis vinifera]	XP_002277849.1	100254260	-4.04	0.00147931
PREDICTED: eukaryotic translation initiation factor 5A-2 [Vitis vinifera]	XP_003634303.1	100852874	1.8	0.00156988
PREDICTED: photosystem II stability/assembly factor HCF136, chloroplastic [Vitis vinifera]	XP_002278958.1	100254346	-1.59	0.00159768
PREDICTED: glyceraldehyde-3-phosphate dehydrogenase A, chloroplastic [Vitis vinifera]	XP_002278352.1	100246378	1.64	0.0016661
PREDICTED: dihydrolipoyl dehydrogenase, mitochondrial [Vitis vinifera]	XP_002263180.1	100246037	6.56	0.00174458
PREDICTED: NADP-dependent glyceraldehyde-3-phosphate dehydrogenase [Vitis vinifera]	XP_002279374.1	100260378	4.26	0.00182351
PREDICTED: heterogeneous nuclear ribonucleoprotein 1-like [Vitis vinifera]	XP_002274734.1		-1.33	0.00186156
unnamed protein product, partial [Vitis vinifera]	CBI27021.3	100242187	-1.63	0.00199017
PREDICTED: proteasome subunit alpha type-5 [Vitis vinifera]	XP_002265563.1	100263432	3.45	0.00204658
PREDICTED: peptidyl-prolyl cis-trans isomerase [Vitis vinifera]	XP_002274869.1	100247119	1.62	0.0020486
PREDICTED: sm-like protein LSM3B [Vitis vinifera]	XP_002266320.2	100253870	-2.44	0.00222185
PREDICTED: THO complex subunit 4A [Vitis vinifera]	XP_002284215.1	100257081	-2.22	0.00225068
PREDICTED: protein FLX-like 3 [Vitis vinifera]	XP_002278937.2	100253153	-1.89	0.00226659
temperature-induced lipocalin [Vitis vinifera]	ABB02395.1	100265927	2.65	0.00229503
photosystem II CP43 chlorophyll apoprotein (chloroplast) [Vitis vinifera]	ABE47530.1	4025084	-4.08	0.00233069
PREDICTED: uncharacterized protein LOC100263834 [Vitis vinifera]	XP_002271931.1	100263834	4.04	0.00234631
PREDICTED: luminal-binding protein 5 isoform X2 [Vitis vinifera]	XP_002276268.2	100253826	2.51	0.00237831
PREDICTED: probable pyridoxal 5'-phosphate synthase subunit PDX2 [Vitis vinifera]	XP_002285095.1	100267348	2.11	0.00247486
PREDICTED: uncharacterized protein LOC100260053 [Vitis vinifera]	XP_002284612.1	100260053	-3.25	0.00249559
PREDICTED: 10 kDa chaperonin, mitochondrial [Vitis vinifera]	XP_002264840.1	100254674	-1.43	0.00249697
PREDICTED: peptidyl-prolyl cis-trans isomerase [Vitis vinifera]	XP_002273421.2	100250386	3.42	0.00261923
PREDICTED: nitrogen regulatory protein P-II homolog isoform X1 [Vitis vinifera]	XP_002279289.1	100262411	-1.46	0.00272907
PREDICTED: cysteine synthase [Vitis vinifera]	XP_003633658.1	100264196	3.3	0.00273817
PREDICTED: S-adenosylmethionine synthase 5 [Vitis vinifera]	XP_002280106.1	100243560	4.32	0.00274397
PREDICTED: 40S ribosomal protein S18 isoform X2 [Vitis vinifera]	XP_003632303.1	100855135	-2.71	0.00278718
PREDICTED: eukaryotic translation initiation factor 5A-2 [Vitis vinifera]	XP_002285505.1	100247352	3.08	0.00285308
putative ripening-related protein [Vitis vinifera]	CAB85627.1	100233109	-4.31	0.00295619
PREDICTED: ATP synthase gamma chain, chloroplastic [Vitis vinifera]	XP_002275015.1	100264091	1.54	0.00313196
PREDICTED: uncharacterized protein LOC100257186 [Vitis vinifera]	XP_002276532.2		3.33	0.00327499
PREDICTED: major allergen Pru ar 1 [Vitis vinifera]	XP_002273790.2	100253292	-1.47	0.00331208
PREDICTED: fructose-bisphosphate aldolase, cytoplasmic isozyme 1 [Vitis vinifera]	XP_002263794.1	100265177	1.58	0.00333048
PREDICTED: LOW QUALITY PROTEIN: polyphenol oxidase, chloroplastic [Vitis vinifera]	XP_010647100.1	100256583	-1.4	0.00337436
PREDICTED: probable plastid-lipid-associated protein 13, chloroplastic [Vitis vinifera]	XP_002279430.1	100246993	-1.43	0.00348233
PREDICTED: auxin-repressed 12.5 kDa protein isoform X1 [Vitis vinifera]	XP_002279836.1	100260521	-1.85	0.00355091
unnamed protein product, partial [Vitis vinifera]	CBI37468.3	100254618	-2.58	0.00376918
polyphenol oxidase [Vitis vinifera]	AKG51698.1		-2.12	0.003818
PREDICTED: NAD(P)H dehydrogenase (quinone) FQR1 [Vitis vinifera]	XP_002283286.1	100232919	-3.14	0.0038343
PREDICTED: protein disulfide-isomerase [Vitis vinifera]	XP_002285864.1	100259138	1.43	0.00388038
PREDICTED: glutaredoxin [Vitis vinifera]	XP_002276266.1	100244121	1.59	0.004001
PREDICTED: ATP sulfurylase 2 [Vitis vinifera]	XP_002276993.1	100252345	3.05	0.00414453
PREDICTED: leucine aminopeptidase 1 isoform X1 [Vitis vinifera]	XP_002276114.1	100250183	2.86	0.00420474
PREDICTED: elongation factor Tu, chloroplastic-like [Vitis vinifera]	XP_003633810.1	100245586	3.22	0.00427326
PREDICTED: glycine-rich RNA-binding protein GRP2A [Vitis vinifera]	XP_003631658.1	100853676	-1.24	0.00435376
PREDICTED: NADPH-dependent pterin aldehyde reductase [Vitis vinifera]	XP_002268804.1	100267823	1.31	0.00460692
PREDICTED: 40S ribosomal protein S17 [Vitis vinifera]	XP_002281256.1	100256195	-3.9	0.00462991
PREDICTED: rhodanese-like/PpiC domain-containing protein 12, chloroplastic [Vitis vinifera]	XP_002276538.1	100244760	3.38	0.00485496
PREDICTED: 40S ribosomal protein S25-2 [Vitis vinifera]	XP_002283830.1	100258834	-3.79	0.00489557
PREDICTED: calmodulin [Vitis vinifera]	XP_010645766.1	100260795	-2.2	0.00489969
PREDICTED: uncharacterized protein LOC100243384 isoform X1 [Vitis vinifera]	XP_002276984.1	100243384	-1.61	0.00500532
PREDICTED: clathrin light chain 1 [Vitis vinifera]	XP_003635272.1	100854215	-1.39	0.0050558
PREDICTED: binding partner of ACD11 1 [Vitis vinifera]	XP_002274164.1	100244246	-1.17	0.0052054
PREDICTED: ribulose bisphosphate carboxylase/oxygenase activase, chloroplastic isoform X1 [Vitis vinifera]	XP_002282236.1	100263871	1.38	0.00522652
PREDICTED: ATP synthase subunit d, mitochondrial [Vitis vinifera]	XP_002277452.1	100241092	-1.38	0.00522881
photosystem II protein D2 (chloroplast) [Vitis vinifera]	ABE47529.1	4025083	-3.61	0.00533477
PREDICTED: chlorophyll a-b binding protein 6, chloroplastic [Vitis vinifera]	XP_002275552.1	100263275	2.67	0.00541682
PREDICTED: psbP domain-containing protein 4, chloroplastic isoform X1 [Vitis vinifera]	XP_002265695.1	100252244	-1.39	0.00546608
unnamed protein product, partial [Vitis vinifera]	CBI33169.3	100233050	1.61	0.00576987
PREDICTED: ferredoxin-thioredoxin reductase, variable chain [Vitis vinifera]	XP_002271306.1	100257686	-1.41	0.00590147
PREDICTED: calvin cycle protein CP12-3, chloroplastic [Vitis vinifera]	XP_002276622.1	100251226	-1.53	0.00604854
PREDICTED: uncharacterized protein At4g13200, chloroplastic [Vitis vinifera]	XP_002267372.1	100247719	-1.36	0.00642439
PREDICTED: cell division protein FtsZ homolog 2-1, chloroplastic [Vitis vinifera]	XP_002282740.1	100251032	-1.39	0.00653005
PREDICTED: cytochrome c oxidase subunit 6b-1 isoform X1 [Vitis vinifera]	XP_002282033.1	100263948	-3.47	0.00693886
PREDICTED: probable alpha-mannosidase At5g13980 [Vitis vinifera]	XP_002280858.1	100249067	-3.85	0.00703227
PREDICTED: far upstream element-binding protein 2 [Vitis vinifera]	XP_002278761.1	100259454	-1.38	0.00732646
type II peroxiredoxin E [Vitis vinifera]	NP_001268192.1	100264932	1.05	0.00746146
hypothetical protein VITISV_016403 [Vitis vinifera]	CAN81311.1	100265039	-1.95	0.00746887
PREDICTED: ATP-dependent zinc metalloprotease FTSH 2, chloroplastic [Vitis vinifera]	XP_002282107.1	100250511	1.28	0.00754459
PREDICTED: probable small nuclear ribonucleoprotein G [Vitis vinifera]	XP_002282193.1	100247783	-1.53	0.00756204
PREDICTED: uncharacterized protein LOC100264617 [Vitis vinifera]	XP_002275276.3	100264617	-1.36	0.00760193
PREDICTED: rho-N domain-containing protein 1, chloroplastic [Vitis vinifera]	XP_002277984.1	100261778	-1.36	0.00764504
PREDICTED: elongation factor Ts, mitochondrial [Vitis vinifera]	XP_002282316.1	100259510	2.02	0.00819309
PREDICTED: photosynthetic NDH subunit of subcomplex B 3, chloroplastic [Vitis vinifera]	XP_002284206.1	100241139	3.77	0.00840793
PREDICTED: peptide chain release factor APG3, chloroplastic [Vitis vinifera]	XP_002269884.1	100247720	1.97	0.00853368
PREDICTED: phosphoglycolate phosphatase 1B, chloroplastic [Vitis vinifera]	XP_002268808.3		2.19	0.00868715
PREDICTED: nascent polypeptide-associated complex subunit alpha-like protein 1 [Vitis vinifera]	XP_002266597.1	100245825	-1.09	0.00894656
PREDICTED: protein P21 [Vitis vinifera]	XP_002283030.1	100259841	3.03	0.0090328
PREDICTED: 40S ribosomal protein S12 [Vitis vinifera]	XP_002279327.1	100265590	2.93	0.0090728
PREDICTED: glycine-rich RNA-binding protein 4, mitochondrial [Vitis vinifera]	XP_002264895.1	100247038	-1.89	0.00907424
PREDICTED: mitochondrial outer membrane protein porin of 34 kDa [Vitis vinifera]	XP_002282471.1	100264665	3.65	0.00919076
PREDICTED: alpha-xylosidase 1 [Vitis vinifera]	XP_002282429.1	100262991	-2.86	0.00935178
PREDICTED: uncharacterized protein LOC100247770 isoform X1 [Vitis vinifera]	XP_002274959.1	100247770	-2.82	0.00948287
PREDICTED: stromal 70 kDa heat shock-related protein, chloroplastic [Vitis vinifera]	XP_002279101.1	100249184	1.36	0.0096434
PREDICTED: glycine-rich RNA-binding protein RZ1A [Vitis vinifera]	XP_003634493.1	100256416	2.97	0.00969493
PREDICTED: uncharacterized protein LOC100245159 [Vitis vinifera]	XP_002266350.1	100245159	-1.22	0.00975631
PREDICTED: mitochondrial import inner membrane translocase subunit Tim9 [Vitis vinifera]	XP_002283877.1	100244947	-1.5	0.00999247
PREDICTED: uncharacterized protein LOC100244206 [Vitis vinifera]	XP_002282517.1	100244206	3.92	0.0101528
PREDICTED: peroxisomal (S)-2-hydroxy-acid oxidase GLO1 isoform X2 [Vitis vinifera]	XP_010644817.1	100244701	-2.01	0.010243
PREDICTED: heterogeneous nuclear ribonucleoprotein 1 [Vitis vinifera]	XP_002277226.1	100246013	-1.09	0.0103587
PREDICTED: nucleoside diphosphate kinase 2, chloroplastic isoform X2 [Vitis vinifera]	XP_002263177.1	100242823	2.56	0.0103821
PREDICTED: peptidyl-prolyl cis-trans isomerase FKBP16-4, chloroplastic isoform X3 [Vitis vinifera]	XP_002264435.1	100260611	-2.54	0.0104615
PREDICTED: fructose-bisphosphate aldolase 1, chloroplastic [Vitis vinifera]	XP_002267726.1	100262354	1.36	0.010522
PREDICTED: NADH dehydrogenase [ubiquinone] 1 beta subcomplex subunit 9 [Vitis vinifera]	XP_002268405.1	100246984	-3.55	0.0106406
PREDICTED: multiple organellar RNA editing factor 9, chloroplastic [Vitis vinifera]	XP_010644312.1	100255654	3.88	0.0108647
PREDICTED: 3-isopropylmalate dehydratase small subunit 3 [Vitis vinifera]	XP_010647190.1	100241307	2.7	0.010955
PREDICTED: MLP-like protein 28 isoform X2 [Vitis vinifera]	XP_002284578.2	100262819	-1.66	0.0112673
PREDICTED: eukaryotic translation initiation factor 5A-like [Vitis vinifera]	XP_003635375.2	100853490	3.79	0.0114744
PREDICTED: putative quinone-oxidoreductase homolog, chloroplastic [Vitis vinifera]	XP_002267533.3	100248513	3.56	0.0121409
hypothetical protein VITISV_014971 [Vitis vinifera]	CAN60554.1	100264572	-1.79	0.0121495
PREDICTED: 50S ribosomal protein L1, chloroplastic [Vitis vinifera]	XP_002274498.1	100244868	1.3	0.0127714
PREDICTED: ruBisCO large subunit-binding protein subunit alpha [Vitis vinifera]	XP_002277357.2	100253324	1.13	0.0128287
PREDICTED: macrophage migration inhibitory factor homolog isoform X2 [Vitis vinifera]	XP_002263560.1	100256897	2.74	0.0129879
PREDICTED: uncharacterized protein LOC100265785 isoform X1 [Vitis vinifera]	XP_002284553.1	100265785	-1.89	0.0131307
PREDICTED: chaperone protein dnaJ A6, chloroplastic [Vitis vinifera]	XP_002274349.1	100268135	3.57	0.0132373
PREDICTED: cysteine synthase, chloroplastic/chromoplastic [Vitis vinifera]	XP_002277485.1	100233046	1.09	0.0135553
PREDICTED: haloacid dehalogenase-like hydrolase domain-containing protein At4g39970 [Vitis vinifera]	XP_003635299.1	100853189	3.67	0.0135698
PREDICTED: V-type proton ATPase subunit B 2 isoform X2 [Vitis vinifera]	XP_002285897.1	100257413	2.76	0.0138757
PREDICTED: mitochondrial outer membrane protein porin 4 [Vitis vinifera]	XP_002272180.1	100242708	2.38	0.01392
PREDICTED: peptide methionine sulfoxide reductase A1 [Vitis vinifera]	XP_002281325.1	100258013	1.49	0.0140208
PREDICTED: actin-7 [Vitis vinifera]	XP_002282516.1	100232866	2.03	0.0140355
PREDICTED: heat shock 70 kDa protein, mitochondrial [Vitis vinifera]	XP_002272173.2	100248447	1.97	0.0142739
unnamed protein product, partial [Vitis vinifera]	CBI26077.3	100264903	-1.76	0.0143677
PREDICTED: polyadenylate-binding protein 2 isoform X1 [Vitis vinifera]	XP_002285190.1	100241923	3.32	0.0145917
PREDICTED: protein SPIRAL1-like 1 [Vitis vinifera]	XP_002285501.1	100252679	-1.48	0.0147657
unnamed protein product, partial [Vitis vinifera]	CBI15803.3	100246786	2.42	0.0148806
malate dehydrogenase [Vitis vinifera]	AAF69802.1	100232859	1.23	0.0149914
PREDICTED: dnaJ protein homolog [Vitis vinifera]	XP_002270362.1	100251979	2.51	0.0154633
PREDICTED: ATP synthase delta chain, chloroplastic [Vitis vinifera]	XP_002274963.1	100251062	1	0.0154991
PREDICTED: protein disulfide isomerase-like 1-4 isoform X1 [Vitis vinifera]	XP_002285136.1	100246809	1.69	0.015821
PREDICTED: glutathione S-transferase DHAR3, chloroplastic isoform X1 [Vitis vinifera]	XP_002266106.1	100258402	0.941	0.0159359
PREDICTED: probable lactoylglutathione lyase, chloroplastic [Vitis vinifera]	XP_003633121.1	100252461	1.92	0.0161805
hypothetical protein VITISV_027349 [Vitis vinifera]	CAN65010.1	104880199	2.11	0.0162242
unnamed protein product, partial [Vitis vinifera]	CBI23563.3		-1.48	0.016406
PREDICTED: actin-depolymerizing factor 2 [Vitis vinifera]	XP_002284292.1	100246819	2.86	0.0168547
hypothetical protein VITISV_012048 [Vitis vinifera]	CAN69132.1		-1.33	0.0169103
PREDICTED: putative 4-hydroxy-4-methyl-2-oxoglutarate aldolase 2 [Vitis vinifera]	XP_002277981.1	100263339	1.49	0.0170282
PREDICTED: peroxisome biogenesis protein 19-2 [Vitis vinifera]	XP_002269360.1	100242021	3.03	0.0173285
PREDICTED: peptide methionine sulfoxide reductase B5 [Vitis vinifera]	XP_002265129.2	100264443	1.04	0.0173306
PREDICTED: heterogeneous nuclear ribonucleoprotein 1 [Vitis vinifera]	XP_002274589.1	100267443	-1.5	0.017616
superoxide dismutase [Vitis vinifera]	AKG51696.1	100233137	0.936	0.0176345
PREDICTED: 40S ribosomal protein S7 [Vitis vinifera]	XP_002283918.1	100241243	-2.67	0.0177534
metacaspase-5-like [Vitis vinifera]	NP_001268027.1	100241522	1.91	0.0179113
unnamed protein product, partial [Vitis vinifera]	CBI38417.3	100250759	2.92	0.0179138
unnamed protein product, partial [Vitis vinifera]	CBI28691.3	100263214	-1.19	0.0179487
PREDICTED: ATP-dependent Clp protease proteolytic subunit 4, chloroplastic [Vitis vinifera]	XP_002282652.1	100254000	-1.45	0.0180424
PREDICTED: 30S ribosomal protein S20, chloroplastic [Vitis vinifera]	XP_002285149.1	100265925	-1.11	0.0181496
unnamed protein product, partial [Vitis vinifera]	CBI31602.3		1.76	0.0182692
PREDICTED: 23.6 kDa heat shock protein, mitochondrial [Vitis vinifera]	XP_002270632.1	100243757	-1.17	0.0185828
PREDICTED: ATP synthase subunit beta, mitochondrial [Vitis vinifera]	XP_002280824.1	100259544	1.16	0.0187316
PREDICTED: bifunctional monothiol glutaredoxin-S16, chloroplastic [Vitis vinifera]	XP_002263823.1	100245544	3.42	0.0193362
PREDICTED: polyadenylate-binding protein 8 [Vitis vinifera]	XP_002284923.1	100255846	2.06	0.0194159
PREDICTED: indole-3-glycerol phosphate synthase, chloroplastic [Vitis vinifera]	XP_002265275.1	100251045	2.53	0.0195313
PREDICTED: prefoldin subunit 6 [Vitis vinifera]	XP_002269426.2	100245160	-2.64	0.0198512
PREDICTED: uncharacterized protein LOC100245250 [Vitis vinifera]	XP_002282265.2	100245250	1.7	0.0199575
PREDICTED: thiosulfate sulfurtransferase 16, chloroplastic [Vitis vinifera]	XP_002271073.3	100259157	0.986	0.0201504
PREDICTED: uncharacterized protein LOC100249521 [Vitis vinifera]	XP_002270877.1	100249521	3.89	0.0202954
ribulose-1,5-bisphosphate carboxylase/oxygenase large subunit, partial (chloroplast) [Vitis vinifera]	CAG25748.1		1.59	0.0206022
PREDICTED: psbP domain-containing protein 3, chloroplastic [Vitis vinifera]	XP_002273332.1	100263326	-2.21	0.0208747
PREDICTED: phosphoglycerate kinase, chloroplastic [Vitis vinifera]	XP_002263796.1	100249576	0.915	0.0208953
PREDICTED: heat shock 70 kDa protein, mitochondrial isoform X1 [Vitis vinifera]	XP_002263457.1	100250929	2.12	0.0209744
PREDICTED: phosphoglycolate phosphatase 2 isoform X2 [Vitis vinifera]	XP_003635038.1	100243036	3.28	0.0210228
PREDICTED: uncharacterized protein LOC100252564 [Vitis vinifera]	XP_002277983.1	100252564	-1.65	0.0210386
PREDICTED: V-type proton ATPase subunit E [Vitis vinifera]	XP_002274995.1	100246834	2.81	0.0213692
PREDICTED: 60S ribosomal protein L23a [Vitis vinifera]	XP_002284261.1	100254719	-1.92	0.0216021
PREDICTED: V-type proton ATPase subunit E1 [Vitis vinifera]	XP_002270168.1	100248521	3.8	0.0217082
PREDICTED: vacuolar protein sorting-associated protein 20 homolog 2 [Vitis vinifera]	XP_002270590.1	100248753	-1.79	0.022096
PREDICTED: ran-binding protein 1 homolog b [Vitis vinifera]	XP_002276692.1	100257001	3.21	0.0222878
PREDICTED: glutaredoxin-C4 [Vitis vinifera]	XP_002266525.1	100241059	-1.87	0.0224469
PREDICTED: 40S ribosomal protein S19-3 [Vitis vinifera]	XP_002284393.1	100255295	-3.44	0.0236052
PREDICTED: protein PLASTID TRANSCRIPTIONALLY ACTIVE 12 isoform X2 [Vitis vinifera]	XP_002272288.2	100251522	-1.85	0.0238544
PREDICTED: uncharacterized protein LOC100257445 [Vitis vinifera]	XP_002285622.1	100257445	-2.13	0.0243541
unnamed protein product, partial [Vitis vinifera]	CBI28434.3		1.76	0.0244024
PREDICTED: 50S ribosomal protein L3, chloroplastic [Vitis vinifera]	XP_002271466.1	100267754	-2.31	0.0249103
PREDICTED: 10 kDa chaperonin, mitochondrial [Vitis vinifera]	XP_002282838.1	100265504	-3.87	0.0252094
hypothetical protein VITISV_035042 [Vitis vinifera]	CAN68405.1	100246364	-1.49	0.0253245
PREDICTED: calmodulin-7 isoform X2 [Vitis vinifera]	XP_003632229.1	100261610	-1.15	0.0253625
hypothetical protein VITISV_008571 [Vitis vinifera]	CAN62909.1		-1.42	0.0253904
PREDICTED: eukaryotic translation initiation factor 3 subunit G [Vitis vinifera]	XP_002282439.1	100251333	1.68	0.0256636
PREDICTED: 50S ribosomal protein L17, chloroplastic [Vitis vinifera]	XP_002275983.1	100263106	-1.47	0.0257237
PREDICTED: 50S ribosomal protein L29, chloroplastic [Vitis vinifera]	XP_003633349.1	100248255	-0.968	0.0264741
PREDICTED: putative lipid-binding protein At4g00165 [Vitis vinifera]	XP_003633921.2	100259034	2.63	0.0267264
unnamed protein product, partial [Vitis vinifera]	CBI40714.3	100244516	1.59	0.0272956
PREDICTED: major allergen Pru av 1 [Vitis vinifera]	XP_002274617.1	100256795	-1.24	0.0274992
PREDICTED: ran-binding protein 1 homolog a [Vitis vinifera]	XP_002280173.1	100247393	1.43	0.0275308
PREDICTED: NADH dehydrogenase [ubiquinone] flavoprotein 2, mitochondrial [Vitis vinifera]	XP_002281655.1	100242595	2.39	0.0279742
PREDICTED: TOM1-like protein 2 [Vitis vinifera]	XP_010644085.1	100264036	1.86	0.0280595
unnamed protein product, partial [Vitis vinifera]	CBI30370.3	100259748	0.911	0.0281599
PREDICTED: thioredoxin [Vitis vinifera]	XP_002266022.1	100264263	1.06	0.0285501
PREDICTED: oxygen-dependent coproporphyrinogen-III oxidase, chloroplastic [Vitis vinifera]	XP_002263190.1	100243271	3.03	0.0291833
PREDICTED: photosynthetic NDH subunit of lumenal location 4, chloroplastic [Vitis vinifera]	XP_002281281.1	100268058	-0.944	0.0303722
PREDICTED: 60S ribosomal protein L19-2 [Vitis vinifera]	XP_002272727.1	100267158	2.36	0.0304577
PREDICTED: uncharacterized protein LOC100253402 [Vitis vinifera]	XP_002266468.1	100253402	2.29	0.0305226
PREDICTED: 22.0 kDa class IV heat shock protein [Vitis vinifera]	XP_002263376.1	100263588	-2.81	0.0312185
PREDICTED: small heat shock protein, chloroplastic [Vitis vinifera]	XP_002272065.1	100261354	-0.934	0.0313108
PREDICTED: lactoylglutathione lyase isoform X2 [Vitis vinifera]	XP_003632261.1	100244888	1.32	0.0315667
unnamed protein product, partial [Vitis vinifera]	CBI16028.3	100854199	-1.45	0.03239
PREDICTED: chaperonin CPN60-2, mitochondrial [Vitis vinifera]	XP_002285608.1	100244356	3.97	0.0324764
PREDICTED: ribulose bisphosphate carboxylase small chain, chloroplastic [Vitis vinifera]	XP_002276967.1	100267942	1.47	0.0326498
PREDICTED: probable WRKY transcription factor 20 isoform X1 [Vitis vinifera]	XP_002272407.1	100256306	1.76	0.0340543
PREDICTED: photosystem II repair protein PSB27-H1, chloroplastic [Vitis vinifera]	XP_002277789.1	100263742	-1.15	0.0345727
PREDICTED: UBX domain-containing protein 4 [Vitis vinifera]	XP_002273725.1	100248761	2.7	0.0350912
PREDICTED: monothiol glutaredoxin-S15, mitochondrial [Vitis vinifera]	XP_002285351.1	100263408	2.75	0.0351219
PREDICTED: methyl-CpG-binding domain-containing protein 11 isoform X1 [Vitis vinifera]	XP_002285323.1	100259445	-0.953	0.035204
PREDICTED: nascent polypeptide-associated complex subunit alpha-like protein 2 [Vitis vinifera]	XP_003634163.1	100854239	-1.64	0.0355965
PREDICTED: uncharacterized protein LOC100262932 [Vitis vinifera]	XP_002280712.1	100262932	1.67	0.0356952
PREDICTED: clathrin light chain 2 [Vitis vinifera]	XP_002269465.1	100248438	-0.956	0.0360516
unnamed protein product [Vitis vinifera]	CBM39207.1	100249611	-3.42	0.0364963
PREDICTED: malate dehydrogenase, mitochondrial [Vitis vinifera]	XP_002285356.1	100253724	1.55	0.0370389
PREDICTED: uncharacterized protein LOC100246892 [Vitis vinifera]	XP_002270599.1		-1.23	0.0371749
PREDICTED: photosystem II 10 kDa polypeptide, chloroplastic [Vitis vinifera]	XP_002271791.1	100243967	-1.23	0.0371941
PREDICTED: pyruvate dehydrogenase E1 component subunit alpha, mitochondrial [Vitis vinifera]	XP_002274285.1	100243322	2	0.0385098
PREDICTED: ATP-dependent Clp protease ATP-binding subunit CLPT1, chloroplastic isoform X1 [Vitis vinifera]	XP_002268037.2	100261804	-0.831	0.0385119
PREDICTED: eukaryotic translation initiation factor 3 subunit J [Vitis vinifera]	XP_002284709.1	100242541	-1.34	0.038514
PREDICTED: elongation factor 1-alpha [Vitis vinifera]	XP_002277159.1	100261589	2.57	0.0387441
PREDICTED: ubiquitin receptor RAD23c [Vitis vinifera]	XP_002283656.1	100244610	2.44	0.0391385
PREDICTED: ribulose bisphosphate carboxylase/oxygenase activase, chloroplastic [Vitis vinifera]	XP_002282979.1	100266698	1.06	0.0392578
PREDICTED: uncharacterized protein LOC100249806 [Vitis vinifera]	XP_002268800.2	100249806	2.08	0.0395582
unnamed protein product, partial [Vitis vinifera]	CBI30402.3		2.05	0.0402135
PREDICTED: polyadenylate-binding protein 2 [Vitis vinifera]	XP_002279148.1	100242522	-1.31	0.0406385
PREDICTED: ferritin-3, chloroplastic [Vitis vinifera]	XP_002277114.1	100267235	-1.11	0.0414939
PREDICTED: uncharacterized protein LOC100262744 isoform X2 [Vitis vinifera]	XP_010645005.1	100262744	1.98	0.0424641
PREDICTED: serine hydroxymethyltransferase, mitochondrial [Vitis vinifera]	XP_010646402.1	100243424	2.34	0.0427396
PREDICTED: heterogeneous nuclear ribonucleoprotein 1 [Vitis vinifera]	XP_002271592.1	100265210	-1.03	0.0431333
PREDICTED: heterogeneous nuclear ribonucleoprotein 1 [Vitis vinifera]	XP_002285419.1	100257917	-1.97	0.0434306
PREDICTED: uncharacterized protein LOC100241562 [Vitis vinifera]	XP_002285744.1	100241562	0.951	0.04361
unnamed protein product, partial [Vitis vinifera]	CBI17497.3	100244526	-2.77	0.0439401
PREDICTED: uncharacterized protein LOC100241479 [Vitis vinifera]	XP_002267558.1	100241479	1.64	0.0439585
PREDICTED: uncharacterized protein LOC100255721 [Vitis vinifera]	XP_002285601.1	100255721	2.22	0.045451
PREDICTED: uncharacterized protein LOC100266598 [Vitis vinifera]	XP_002282019.1	100266598	3.15	0.0455342
PREDICTED: CBS domain-containing protein CBSX1, chloroplastic [Vitis vinifera]	XP_002283079.1	100257777	-0.901	0.0472113
germin-like protein 2 precursor [Vitis vinifera]	NP_001267914.1	100232998	-1.3	0.0472266
PREDICTED: NAD(P)H-quinone oxidoreductase subunit O, chloroplastic isoform X1 [Vitis vinifera]	XP_002280638.1	100248924	-1.19	0.0474802
unnamed protein product, partial [Vitis vinifera]	CBI36823.3	100255621	2.58	0.0481034
PREDICTED: cysteine proteinase inhibitor 12 [Vitis vinifera]	XP_002267841.1	100260839	-1.59	0.0482933
PREDICTED: 60S ribosomal protein L6-3 [Vitis vinifera]	XP_002265394.1	100252724	-1.47	0.0485325
PREDICTED: secoisolariciresinol dehydrogenase-like [Vitis vinifera]	XP_002272838.1	100248353	1.97	0.0488778
PREDICTED: stress-response A/B barrel domain-containing protein UP3-like [Vitis vinifera]	XP_002279848.1	100249118	1.91	0.0491928
PREDICTED: peptidyl-prolyl cis-trans isomerase CYP37, chloroplastic [Vitis vinifera]	XP_002284643.3	100258986	0.998	0.0494732
PREDICTED: SKP1-like protein 1B [Vitis vinifera]	XP_002270061.1	100252349	1.68	0.049711
unnamed protein product, partial [Vitis vinifera]	CBI17306.3		-3.66	0.0497841
